# Supplementary material for: Synthesis of 8-heteroaryl nitroxoline analogues via one-pot sequential Pd-catalyzed coupling reactions
Source: Royal Society of Chemistry journal article supplement (doi:10.1039/c5ob02364e), 2016-01-01
Supplement: c5ob02364e1.pdf [file c5ob02364e1.pdf]

## Synthesis of 8-Heteroaryl Nitroxoline Analogues via One-Pot Sequential Pd-Catalyzed Coupling Reactions

Supplementary Information

Helena Brodnik,<sup>a</sup> Franc Požgan,<sup>a</sup> and Bogdan Štefane<sup>a\*</sup>

<sup>a</sup>Faculty of Chemistry and Chemical Technology, University of Ljubljana, Večna pot 113, SI-1000 Ljubljana,  
Slovenia

*E-mail: bogdan.stefane@fkk.uni-lj.si*

**Table 1.** C–H activation of furan with 8-bromoquinoline (5 equivalents of furan were used).

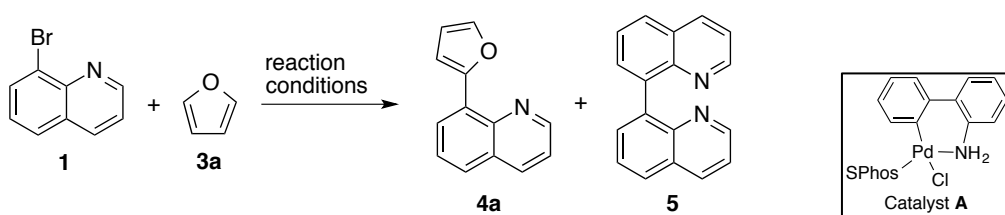

| Entry | Pd-catalyst(mol-%)                       | Ligand (mol-%)<br>[additive]               | Base                                      | Solvent                               | T (°C)     | Reaction<br>time (h) | Conversion (%) <sup>a</sup> | 4a:5a        |
|-------|------------------------------------------|--------------------------------------------|-------------------------------------------|---------------------------------------|------------|----------------------|-----------------------------|--------------|
| 1     | Pd(OAc) <sub>2</sub> (0.5)               | PPh <sub>3</sub> (1.0)                     | KOAc (2 eq)                               | DMAc                                  | 150        | 24                   | 0                           | -            |
| 2     | Pd(OAc) <sub>2</sub> (0.5)               | -                                          | KOAc (2 eq)                               | DMAc                                  | 150        | 24                   | 0                           | -            |
| 3     | Pd <sub>2</sub> (dba) <sub>3</sub> (0.5) | -                                          | KOAc (2 eq)                               | DMAc                                  | 150        | 24                   | 0                           | -            |
| 4     | PdCl <sub>2</sub> (0.5)                  | PPh <sub>3</sub> (1.0)                     | KOAc (2 eq)                               | DMAc                                  | 150        | 24                   | 0                           | -            |
| 5     | Pd(acac) <sub>2</sub> (0.5)              | PPh <sub>3</sub> (1.0)                     | KOAc (2 eq)                               | DMAc                                  | 150        | 24                   | 23                          | 1:1          |
| 6     | Pd(TFA) <sub>2</sub> (0.5)               | PPh <sub>3</sub> (1.0)                     | KOAc (2 eq)                               | DMAc                                  | 150        | 24                   | 0                           | -            |
| 7     | Pd(PPh <sub>3</sub> ) <sub>4</sub> (0.5) | -                                          | KOAc (2 eq)                               | DMAc                                  | 150        | 24                   | 28                          | 1:2          |
| 8     | Catalyst A (0.5)                         | -                                          | KOAc (2 eq)                               | DMAc                                  | 150        | 24                   | 41                          | 1:1.5        |
| 9     | PdCl <sub>2</sub> (dipp) (0.5)           | PivOH (5.0)                                | K <sub>2</sub> CO <sub>3</sub> (2 eq)     | DMAc                                  | 150        | 24                   | 33                          | 2:1          |
| 10    | PdCl <sub>2</sub> (dipp) (0.5)           | -                                          | K <sub>3</sub> PO <sub>4</sub> (2 eq)     | DMAc                                  | 150        | 24                   | 29                          | 1:1          |
| 11    | PdCl <sub>2</sub> (dipp) (0.5)           | -                                          | KAcO (2 eq)                               | DMAc                                  | 150        | 24                   | 23                          | 1:1          |
| 12    | Pd(OAc) <sub>2</sub> (1.0)               | Dppe (1.0)                                 | KOAc (2 eq)                               | DMAc                                  | 150        | 24                   | 29                          | 1:2          |
| 13    | <b>Pd(OAc)<sub>2</sub> (5.0)</b>         | <b>SPhos (10)</b>                          | <b>K<sub>3</sub>PO<sub>4</sub> (2 eq)</b> | <b>NMP</b>                            | <b>150</b> | <b>48</b>            | <b>100</b>                  | <b>1:2.4</b> |
| 14    | Pd(OAc) <sub>2</sub> (5.0)               | SPhos (10)                                 | K <sub>3</sub> PO <sub>4</sub> (2 eq)     | NMP                                   | 120        | 48                   | 61                          | 2:1          |
| 15    | Pd(OAc) <sub>2</sub> (5.0)               | SPhos (10)                                 | K <sub>3</sub> PO <sub>4</sub> (2 eq)     | Dioxane/H <sub>2</sub> O<br>4/1 (v/v) | 150        | 48                   | 29                          | 1:1          |
| 16    | Pd(OAc) <sub>2</sub> (5.0)               | SPhos (10)<br>[Bu <sub>4</sub> NBr (2 eq)] | K <sub>3</sub> PO <sub>4</sub> (2 eq)     | NMP                                   | 150        | 24                   | 61                          | 1:1          |
| 17    | Pd(OAc) <sub>2</sub> (5.0)               | SPhos (10)<br>[Bu <sub>4</sub> NBr (2 eq)] | K <sub>3</sub> PO <sub>4</sub> (2 eq)     | NMP                                   | 150        | 48                   | 88                          | 1:1          |
| 18    | Pd(OAc) <sub>2</sub> (5.0)               | PivOH (30)                                 | K <sub>2</sub> CO <sub>3</sub> (2 eq)     | DMAc                                  | 120        | 24                   | 52                          | 3:1          |
| 19    | Catalyst A (5.0)                         | PivOH (30)                                 | K <sub>2</sub> CO <sub>3</sub> (2 eq)     | DMAc                                  | 150        | 24                   | 96                          | 1:4.5        |
| 20    | Pd(OAc) <sub>2</sub> (5.0)               | (t-Bu) <sub>3</sub> P (10)                 | K <sub>2</sub> CO <sub>3</sub> (2 eq)     | Dioxane/H <sub>2</sub> O<br>4/1 (v/v) | 150        | 24                   | 33                          | 0:1          |

<sup>a</sup>Conversion was determined by <sup>1</sup>H NMR spectroscopy.

**Table 2.** C–H activation of **3a**, **3b**, and **3d–3f** with 8-bromoquinoline (5 equivalents of **3a**, **3b**, and **3d–3f** were used).

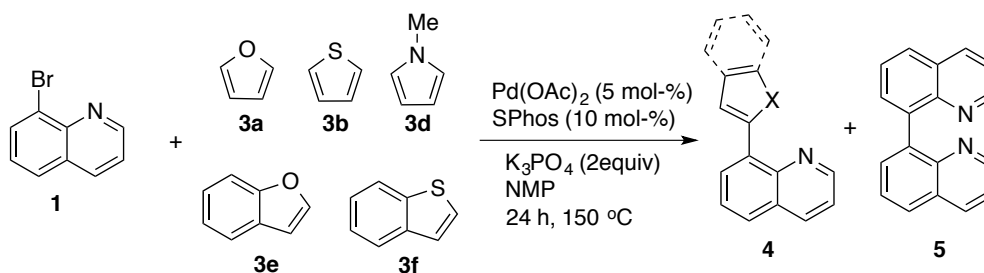

| Heteroarene <b>3</b>                       | Conversion-% <sup>a</sup> (ratio 4:5) |
|--------------------------------------------|---------------------------------------|
| furan ( <b>3a</b> )                        | 100 (1:2.4)                           |
| thiophene ( <b>3b</b> )                    | 89 (3.3:1)                            |
| 1-methyl-1 <i>H</i> -pyrrole ( <b>3d</b> ) | 82 (1:2)                              |
| benzo[ <i>b</i> ]furan ( <b>3e</b> )       | 73 (1:2.7)                            |
| benzo[ <i>b</i> ]thiophene ( <b>3f</b> )   | 100 (2:1)                             |

<sup>a</sup>Conversion was determined by <sup>1</sup>H NMR spectroscopy.

**Table 3.** Coupling of **1** with (furan-3-yl)boronic acid under different reaction conditions.

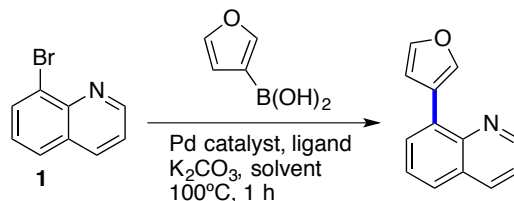

| Entry | Catalyst                           | Ligand           | Solvent                        | Conversion (%) <sup>a</sup> |
|-------|------------------------------------|------------------|--------------------------------|-----------------------------|
| 1     | Pd <sub>2</sub> (dba) <sub>3</sub> | /                | Toluene                        | 50                          |
| 2     | PdCl <sub>2</sub>                  | PPh <sub>3</sub> | Toluene                        | 33                          |
| 3     | Pd(acac) <sub>2</sub>              | PPh <sub>3</sub> | Toluene                        | 83                          |
| 4     | Pd(TFA) <sub>2</sub>               | PPh <sub>3</sub> | Toluene                        | 100                         |
| 5     | Pd(C), 10%                         | /                | Toluene                        | 0                           |
| 6     | Pd(OAc) <sub>2</sub>               | PPh <sub>3</sub> | Toluene                        | 53                          |
| 7     | Pd(PPh <sub>3</sub> ) <sub>4</sub> | /                | Toluene                        | 45                          |
| 8     | Pd(OAc) <sub>2</sub>               | PPh <sub>3</sub> | 1,4-Dioxane                    | 77                          |
| 9     | Pd(OAc) <sub>2</sub>               | PPh <sub>3</sub> | <i>N</i> -methyl-2-pyrrolidone | 23                          |
| 10    | Pd(OAc) <sub>2</sub>               | PPh <sub>3</sub> | 2-Propanol                     | 100                         |
| 11    | Pd(OAc) <sub>2</sub>               | PPh <sub>3</sub> | Water                          | 75                          |
| 12    | Pd(OAc) <sub>2</sub>               | PPh <sub>3</sub> | 1,4-Dioxane/water 4:1 (v/v)    | 95                          |
| 13    | Pd(TFA) <sub>2</sub>               | PPh <sub>3</sub> | 1,4-Dioxane                    | 100                         |
| 14    | Pd(TFA) <sub>2</sub>               | PPh <sub>3</sub> | <i>N</i> -methyl-2-pyrrolidone | 11                          |
| 15    | Pd(TFA) <sub>2</sub>               | PPh <sub>3</sub> | 2-Propanol                     | 100                         |
| 16    | Pd(TFA) <sub>2</sub>               | PPh <sub>3</sub> | Water                          | 63                          |
| 17    | Pd(TFA) <sub>2</sub>               | PPh <sub>3</sub> | 1,4-Dioxane/water 4:1 (v/v)    | 80                          |

<sup>a</sup>Conversion was determined by <sup>1</sup>H NMR spectroscopy.

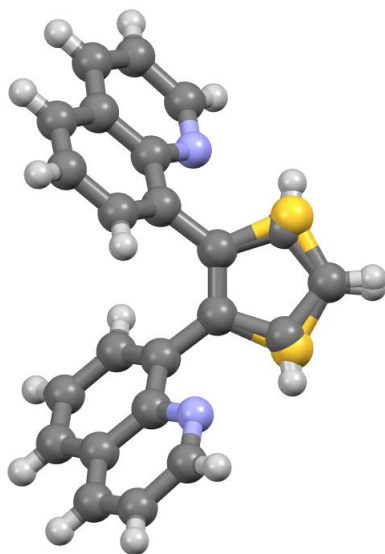

**Figure 1.** X-ray crystal structure of compound **4I'**.

#### **Synthesis of Pd catalyst A<sup>1,2</sup>**

A mixture of Pd(OAc)<sub>2</sub> (84 mg, 0.375 mmol) and 2-amino-biphenyl (63 mg, 0.375 mmol) in toluene (anhydrous, 2 mL) was heated at 60 °C for 1 h, at which the initial red color of the reaction mixture faded and a grey precipitate had formed. The mixture was allowed to cool to r.t., at which the solvent was removed via cannula. The remaining solid was washed with toluene (anhydrous, 2 x 2 mL) and further suspended in acetone (anhydrous, 2 mL). After the addition of lithium chloride (48 mg, 1.125 mmol) the reaction mixture was stirred at room temperature for 24 h to give a dark orange homogenous solution. SPhos (162 mg, 0.394 mmol) was added portionwise over 5 min to which white precipitate had formed. The mixture was stirred for an additional 24 h after which 90 % of the solvent was removed under reduced pressure and the remaining solid was suspended in methyl *tert*-butyl ether (MTBE, 3 mL) and acetone (anhydrous, 0.3 mL). The product was collected by suction filtration, washed with water (3 x 3 mL) and dried under vacuum. White solid (205 mg, 76 %); mp = 181–183 °C; *R*<sub>f</sub> (dichloromethane/methanol = 10/1) 0.28. FT-IR (ATR, neat): 3396, 3316, 2912, 2844, 1489, 1246, 1109, 1035, 1001, 780, 758, 723 cm<sup>-1</sup>. <sup>1</sup>H NMR (500 MHz, CDCl<sub>3</sub>): δ 7.47–7.45 (m, 1H), 7.40–7.31 (m, 2H), 7.22–7.17 (m, 5H), 7.06–7.05 (m, 2H), 6.94–6.91 (m, 1H), 6.70–6.59 (m, 4H), 4.79–4.61 (m, 2H), 3.76–3.66 (m, 6H), 2.04–0.80 (m, 20H). <sup>13</sup>C NMR (125 MHz, CDCl<sub>3</sub>): δ 157.9, 151.5, 140.0, 139.6, 138.5, 138.2, 136.2, 135.3, 133.3, 133.2, 129.5, 128.9, 127.8 (2C), 127.6, 126.5, 126.4, 125.6, 125.1 (2C), 125.0, 124.5, 120.2, 118.9, 104.1, 103.5, 55.3 (2C), 37.0, 35.2, 31.4, 30.9, 28.6, 27.7, 27.6, 27.2 (2C), 26.2. <sup>31</sup>P NMR (202 MHz, CDCl<sub>3</sub>): δ 53.2. HRMS (ESI<sup>+</sup>): *m/z* calcd for C<sub>38</sub>H<sub>45</sub>NO<sub>2</sub>PPd (M - HCl)<sup>+</sup>: 680.2238; found: 680.2236.

## Compound 2

### $^1\text{H}$ NMR

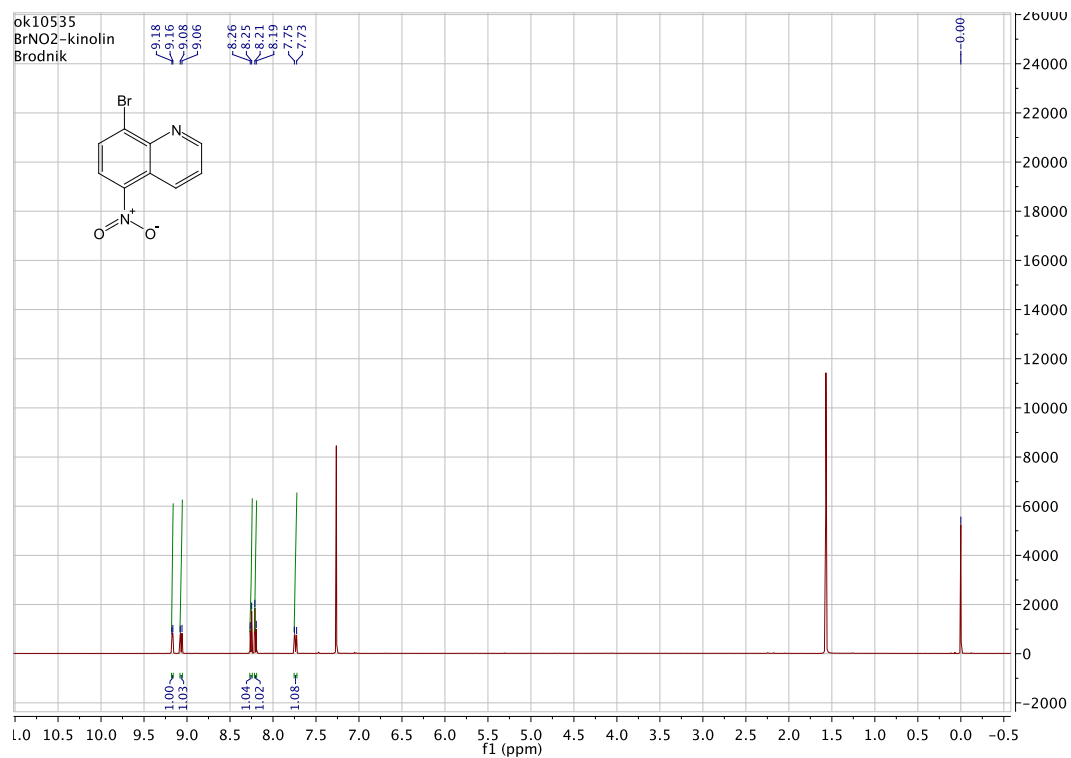

### $^{13}\text{C}$ NMR

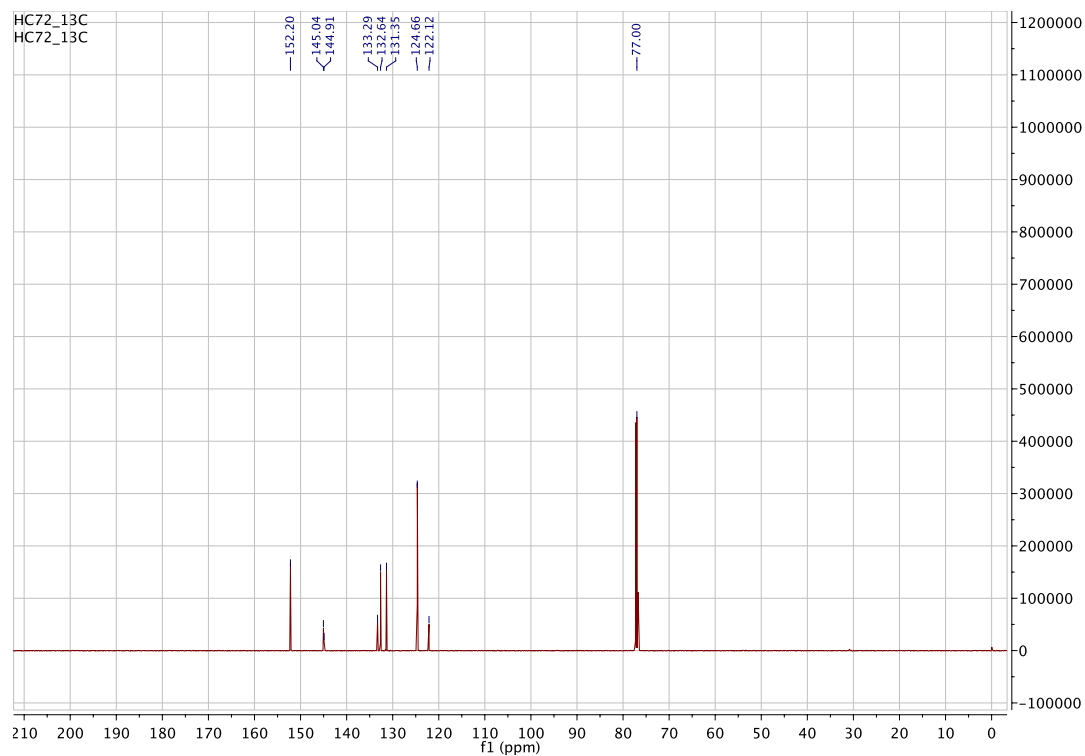

# Compound 4a

## <sup>1</sup>H NMR

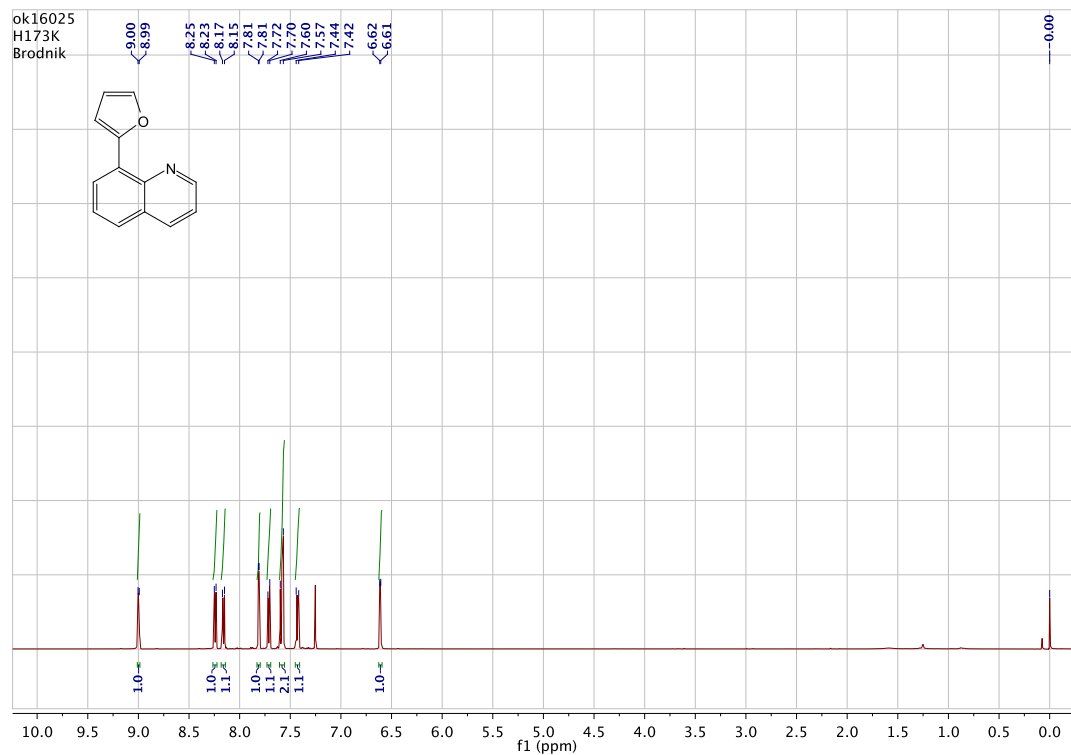

## <sup>13</sup>C NMR

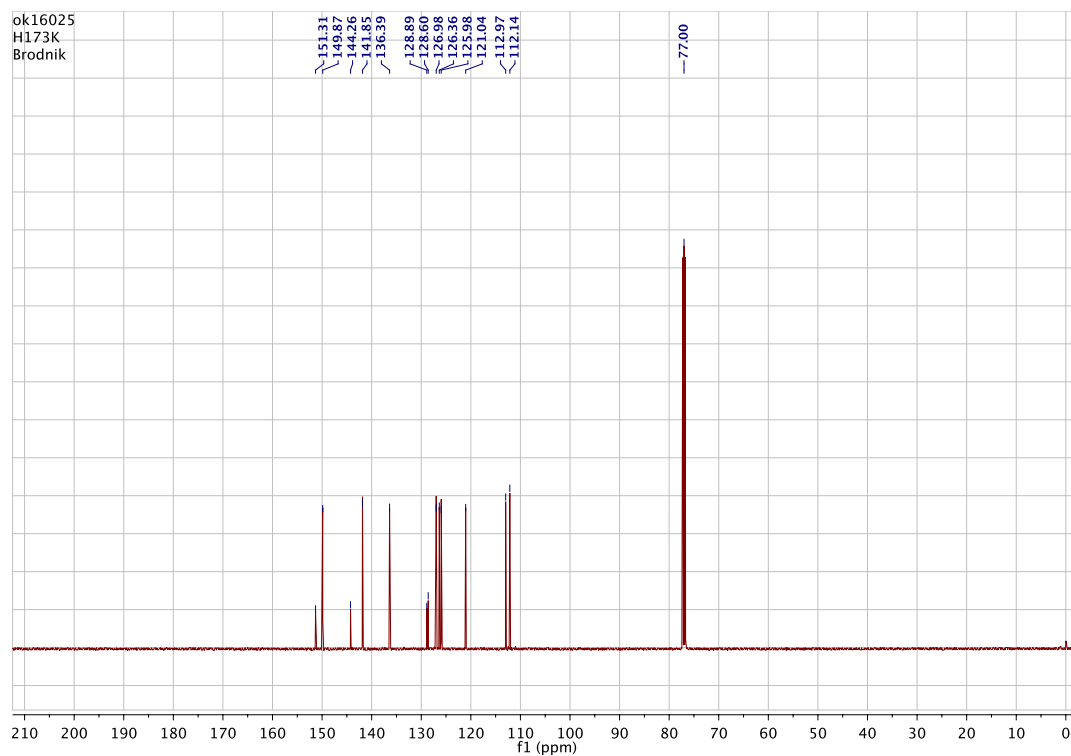

# Compound 4b

## <sup>1</sup>H NMR

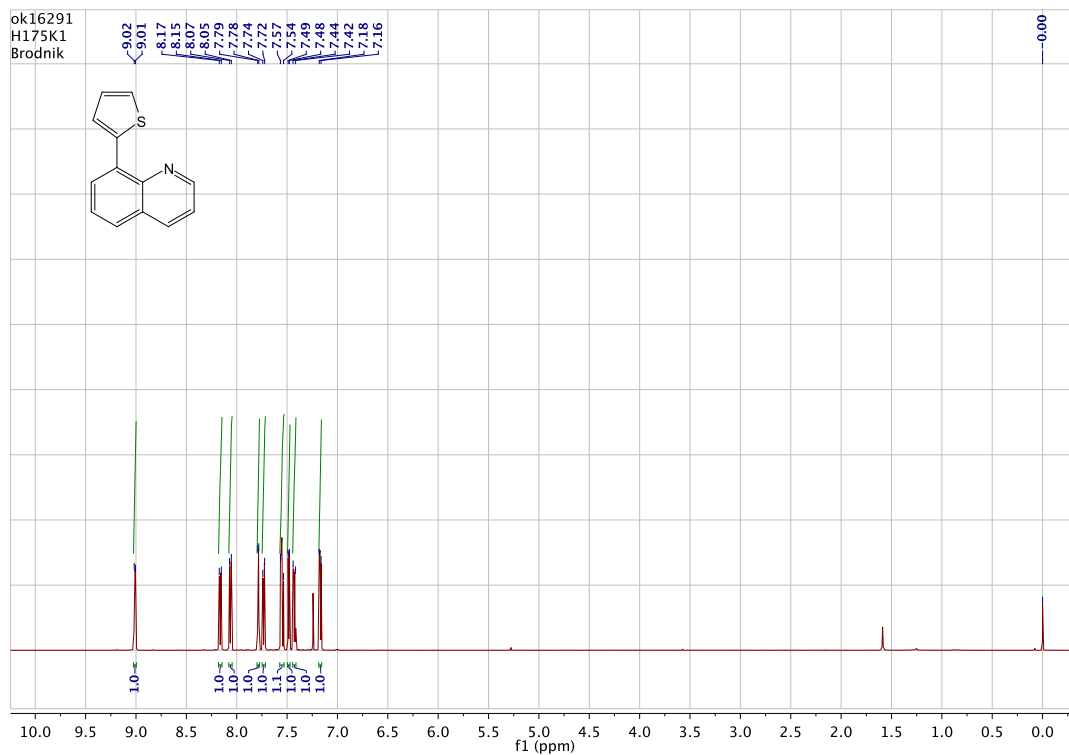

## <sup>13</sup>C NMR

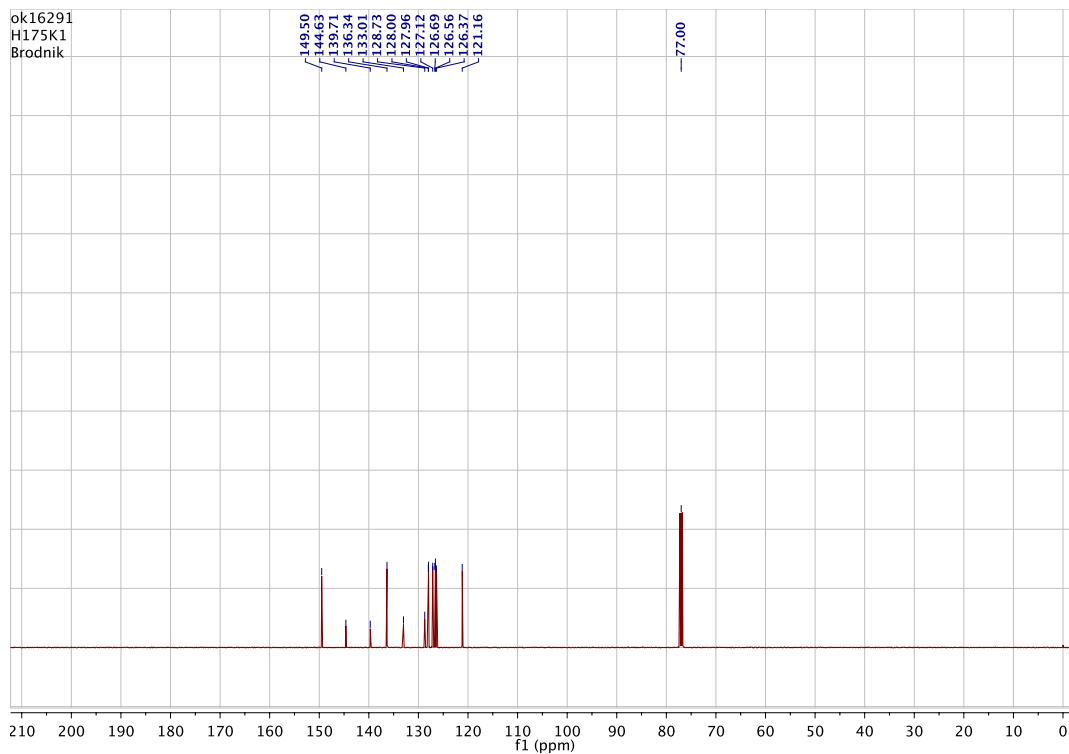

# Compound 4c

## <sup>1</sup>H NMR

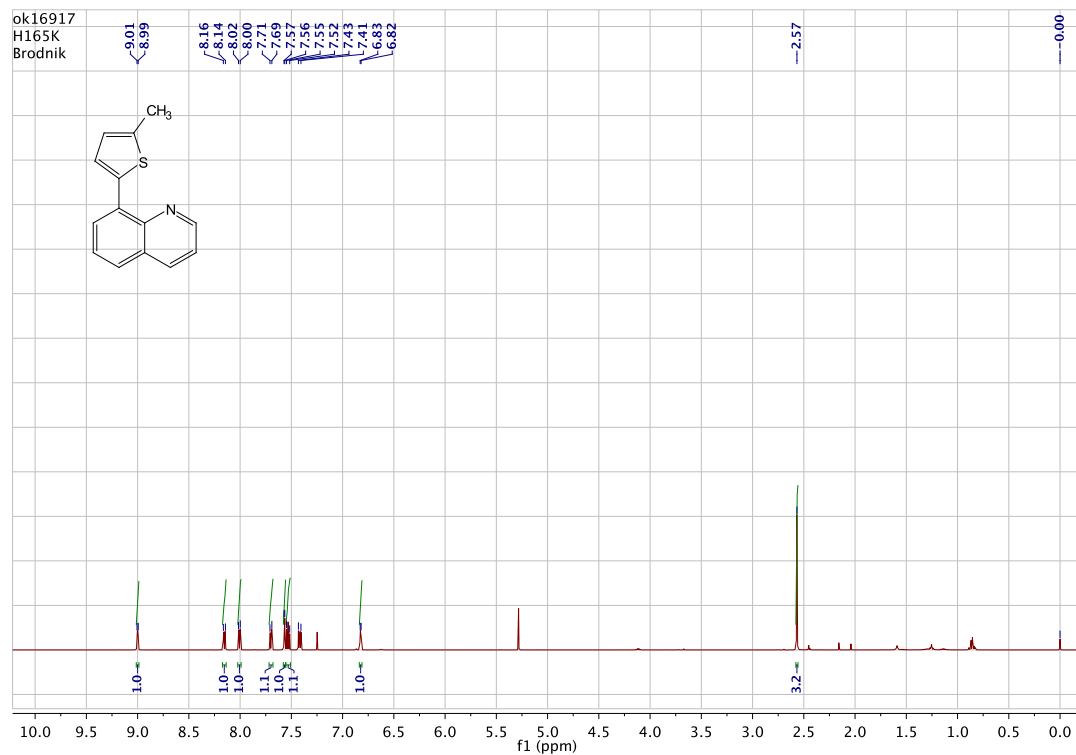

## <sup>13</sup>C NMR

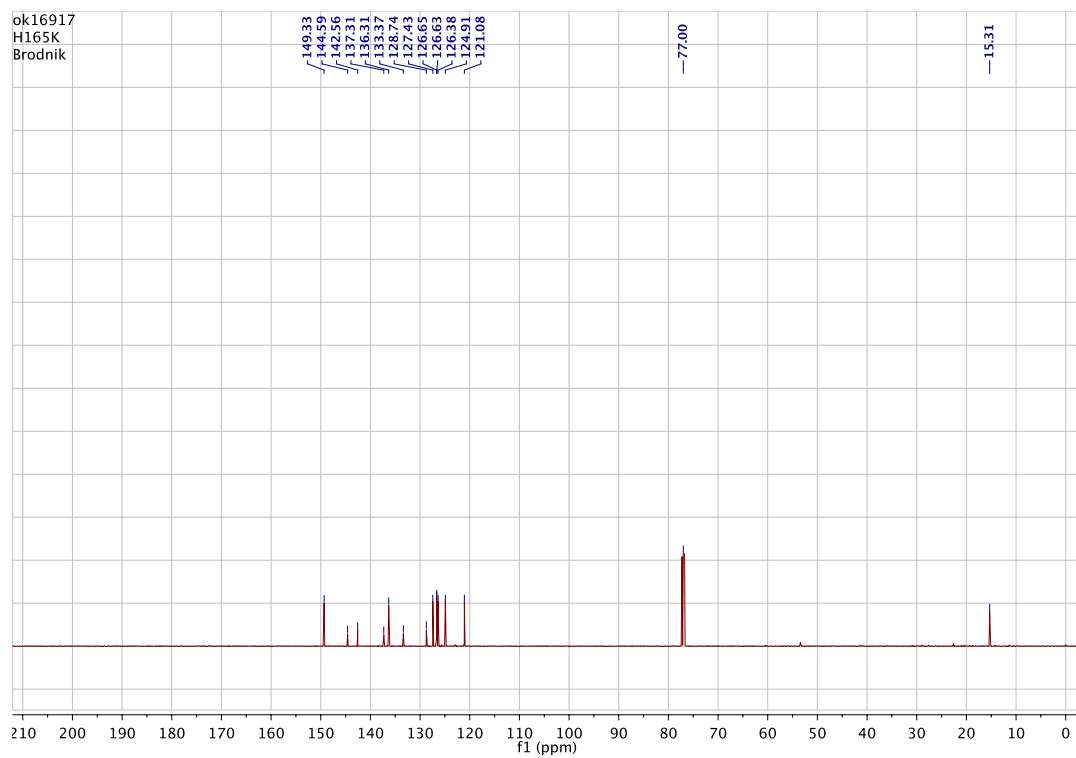

# Compound 4d

## <sup>1</sup>H NMR

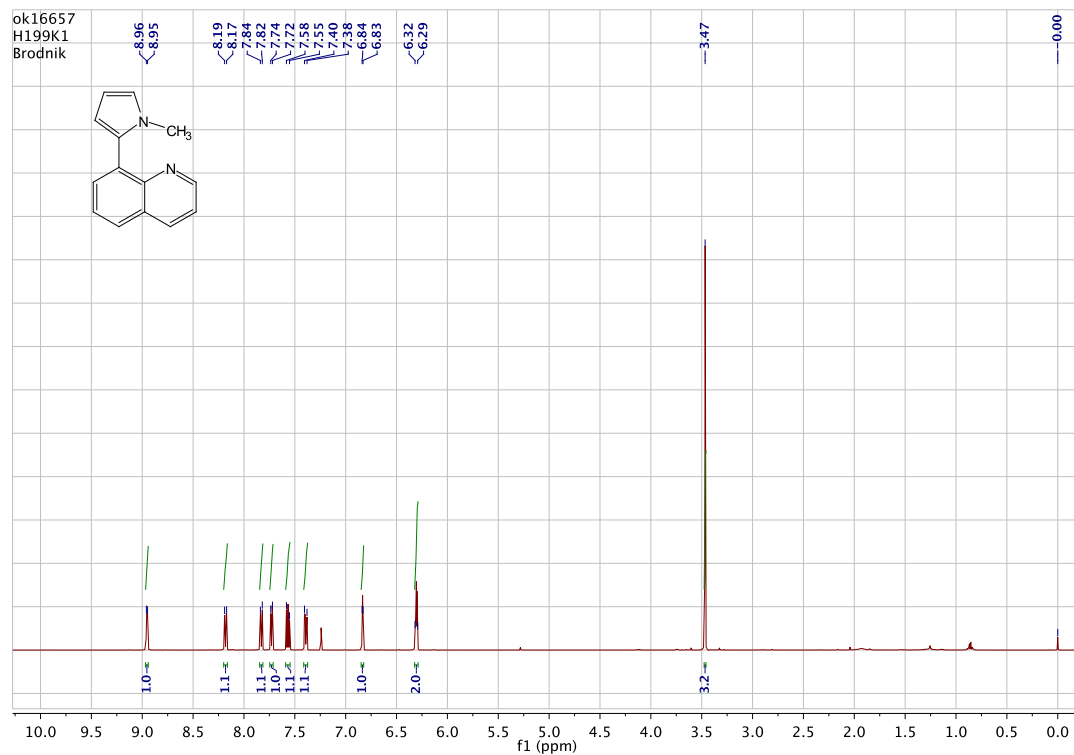

## <sup>13</sup>C NMR

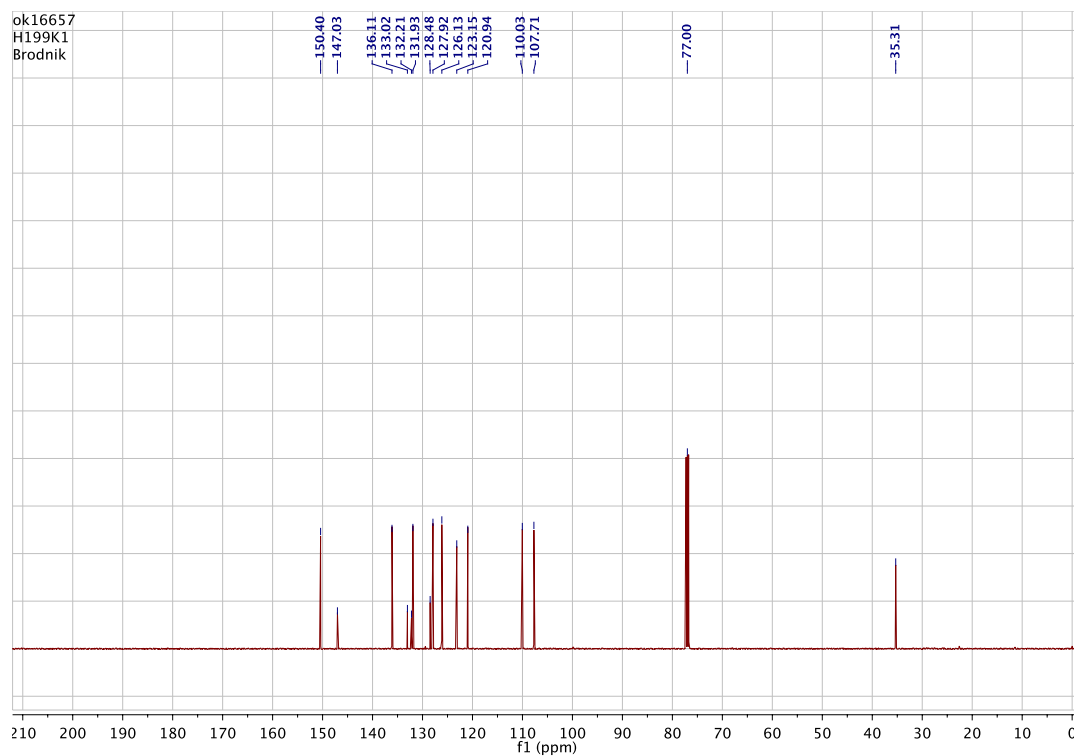



# Compound 4e

## <sup>1</sup>H NMR

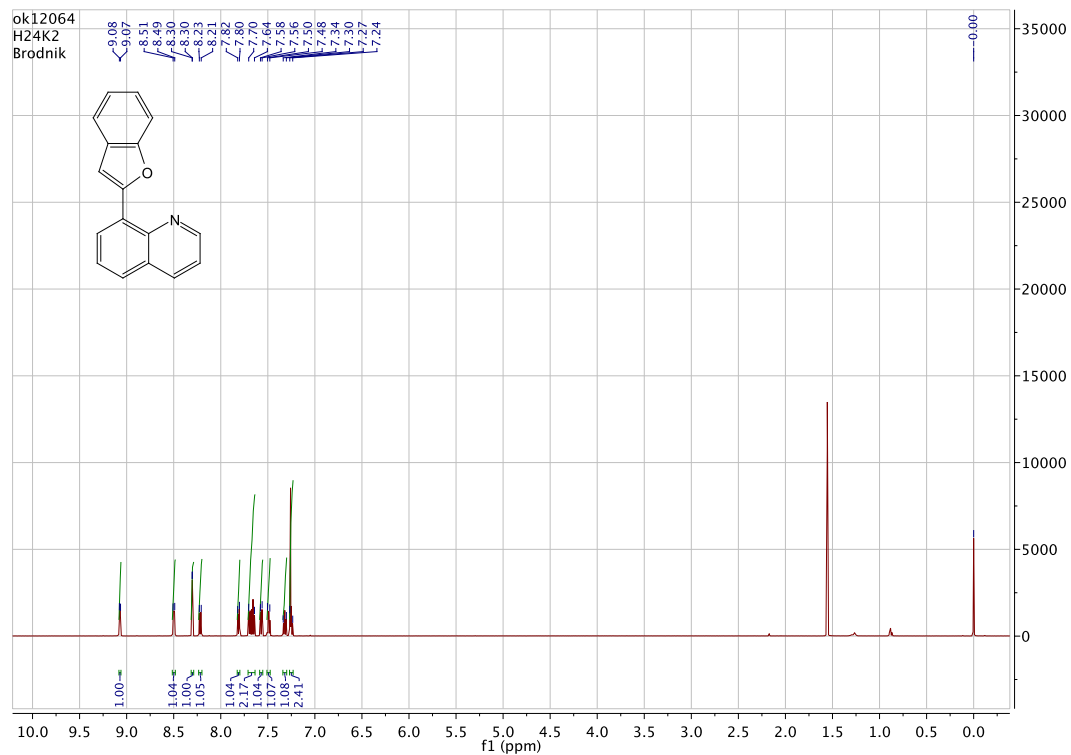

## <sup>13</sup>C NMR

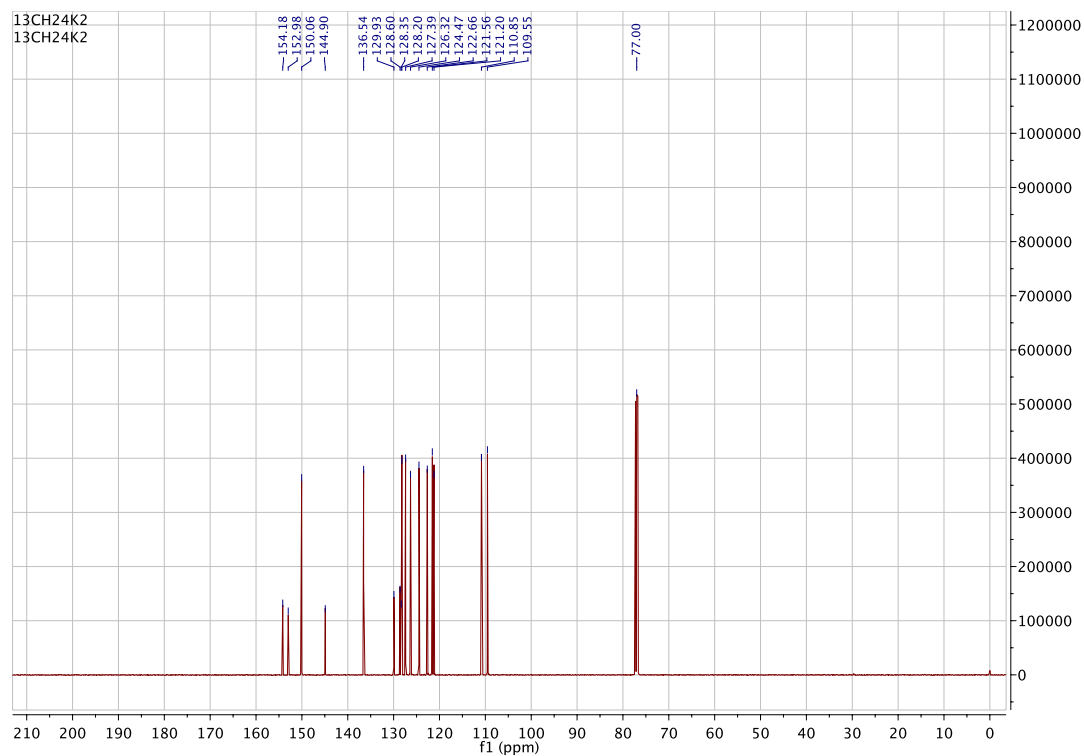

# Compound 4f

## <sup>1</sup>H NMR

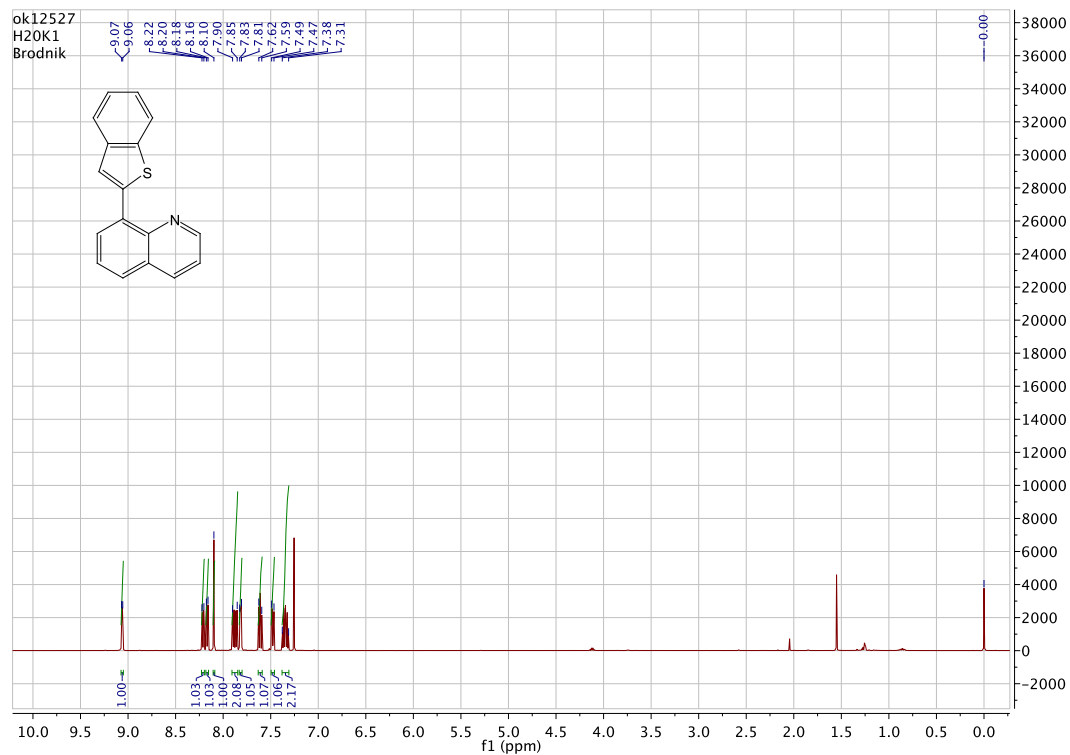

## <sup>13</sup>C NMR

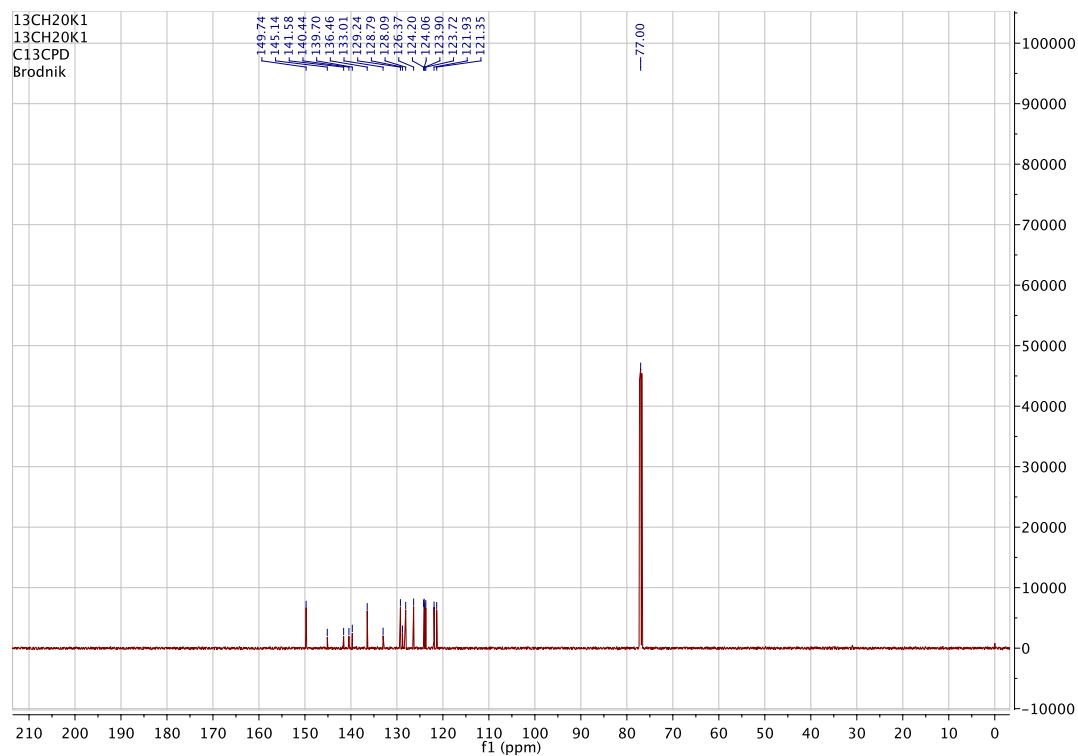

# Compound 4g

## <sup>1</sup>H NMR

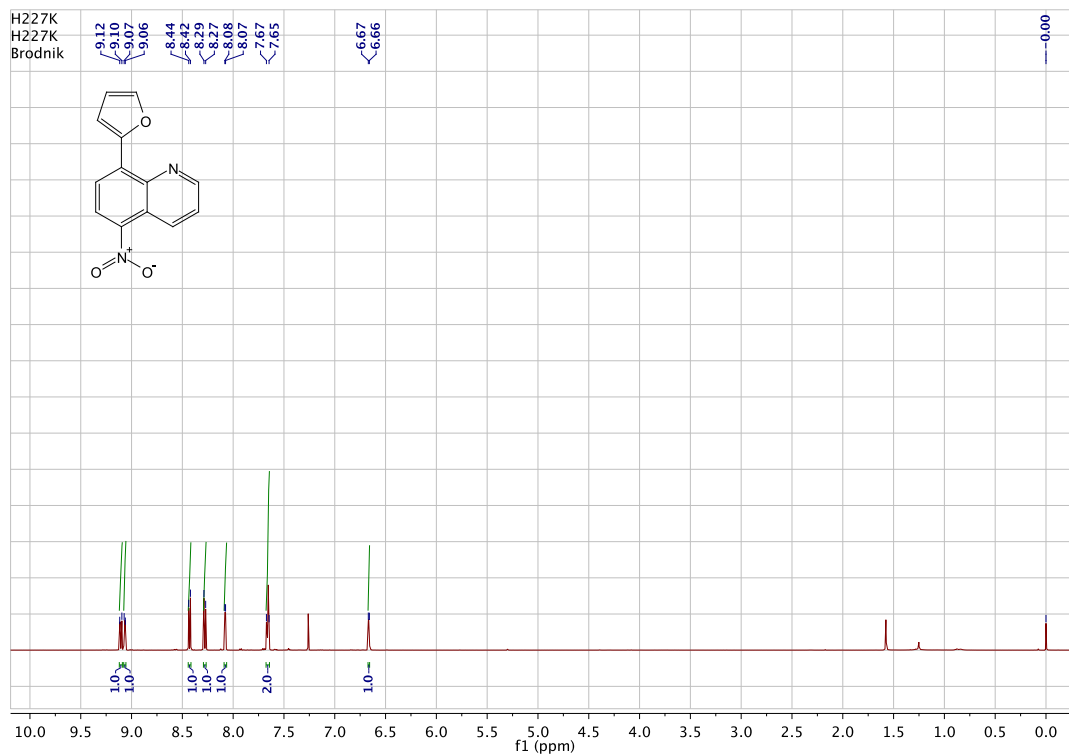

## <sup>13</sup>C NMR

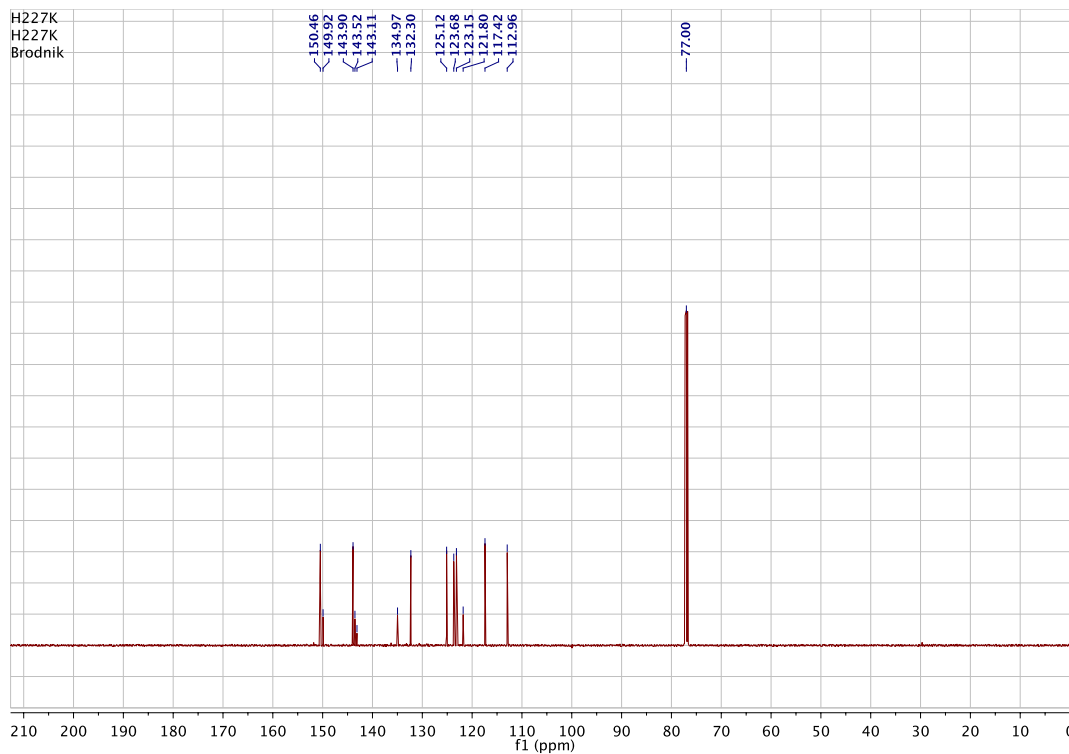

# Compound 4h

## <sup>1</sup>H NMR

H276a.1.fid  
H276a

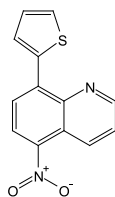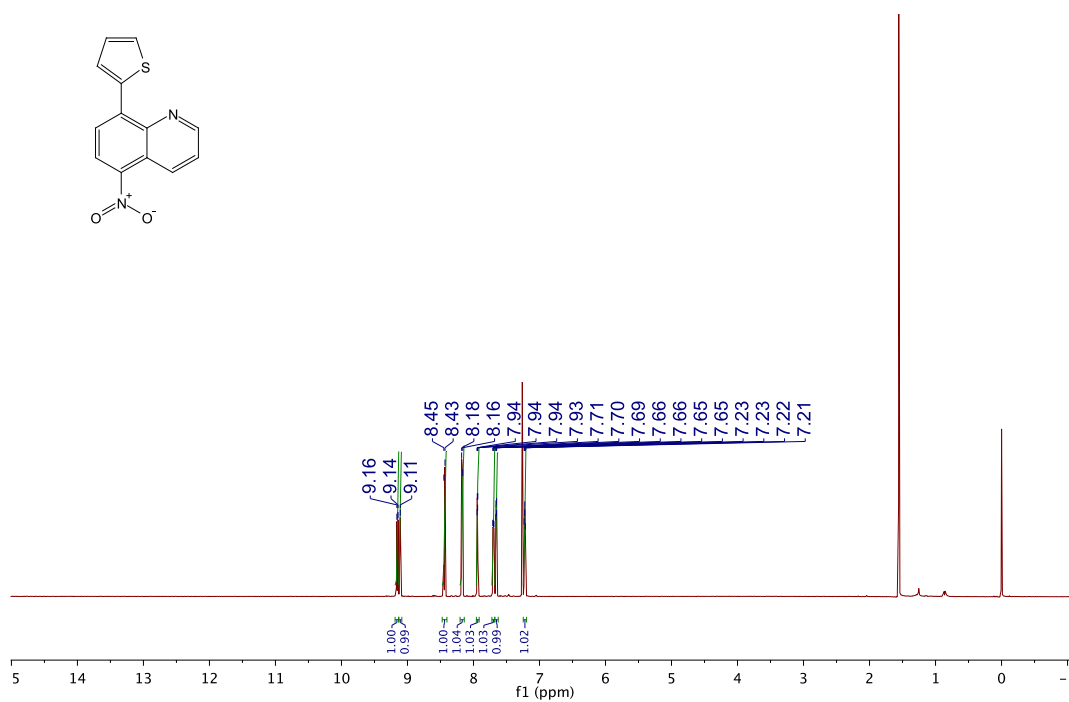

## <sup>13</sup>C NMR

H276a.2.fid  
H276a  
13C

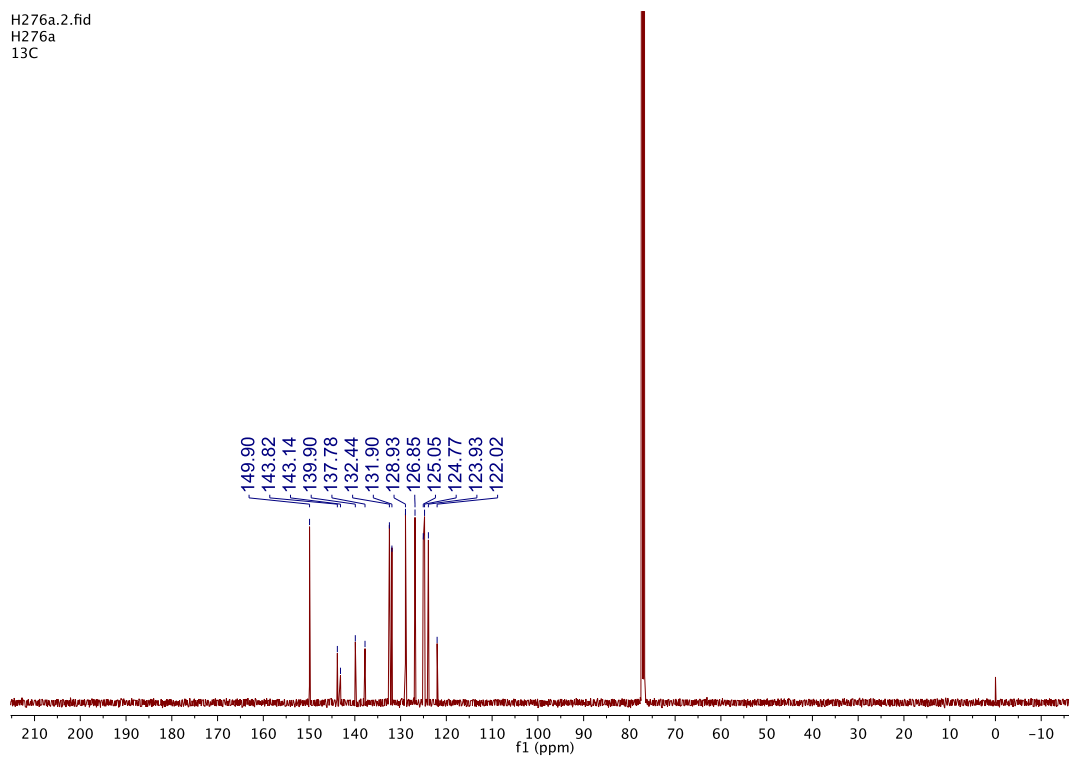

# Compound 4i

## <sup>1</sup>H NMR

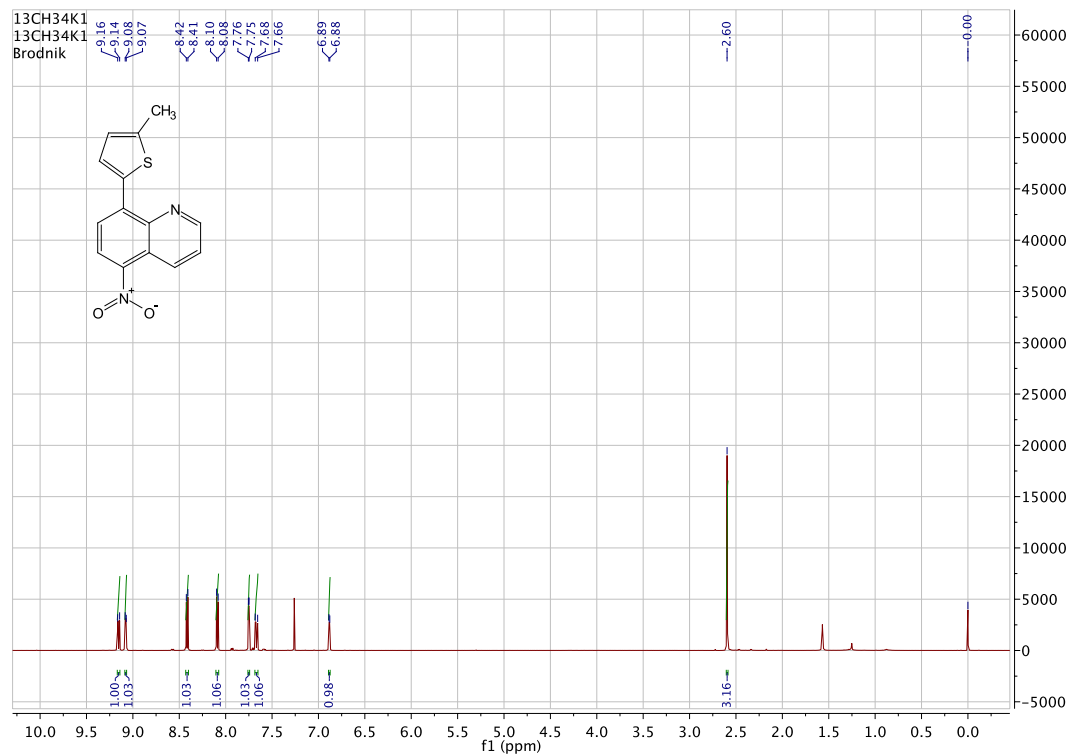

## <sup>13</sup>C NMR

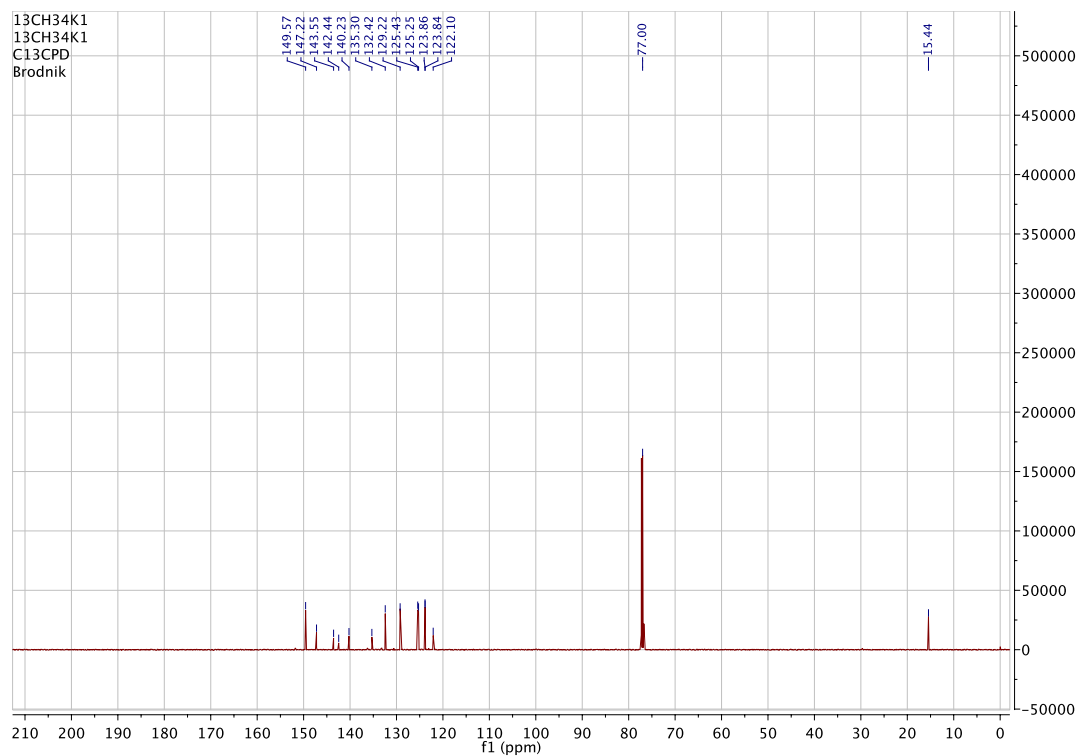

# Compound 4j

## <sup>1</sup>H NMR

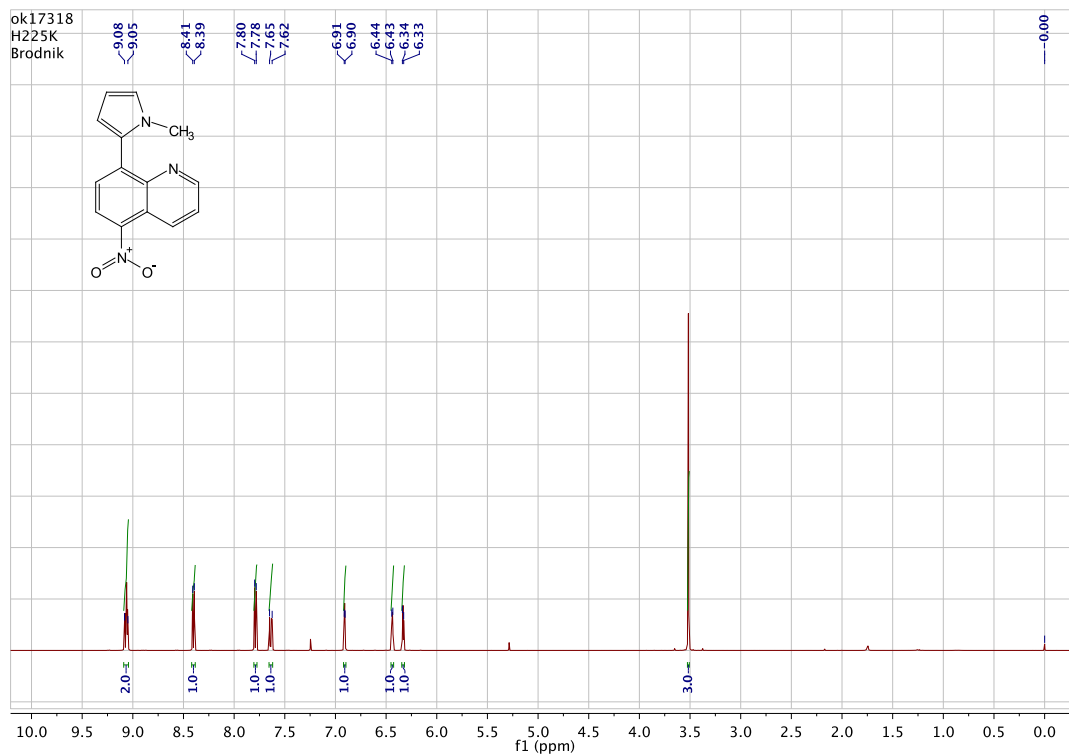

## <sup>13</sup>C NMR

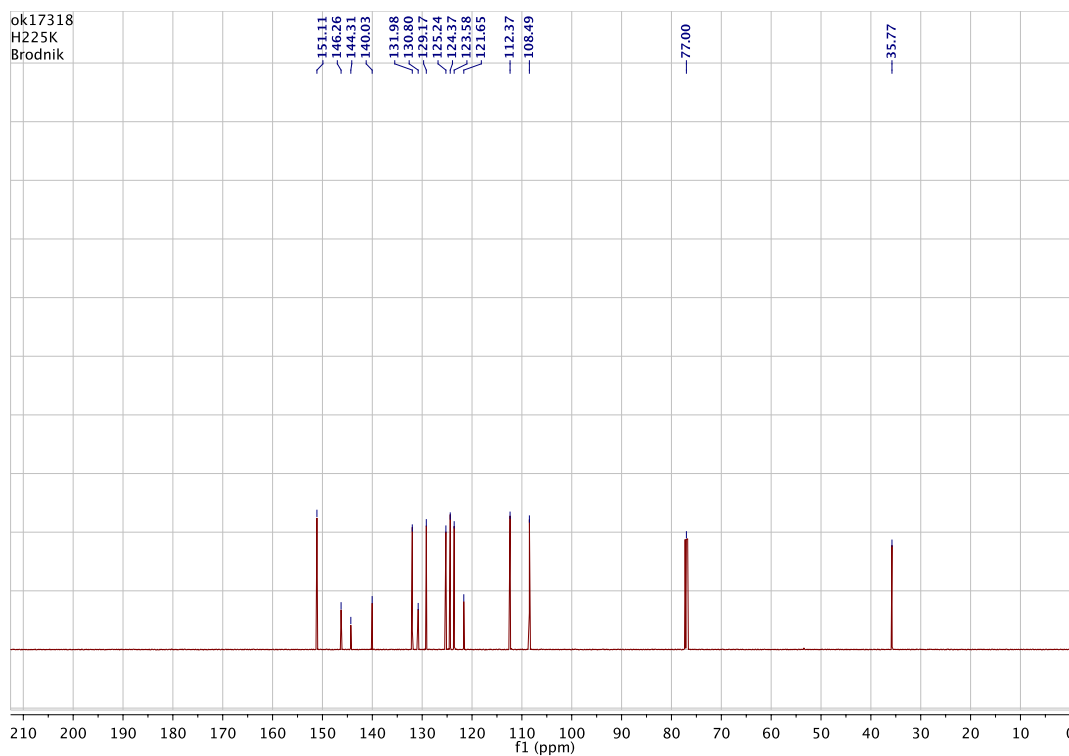

# Compound 4k

## <sup>1</sup>H NMR

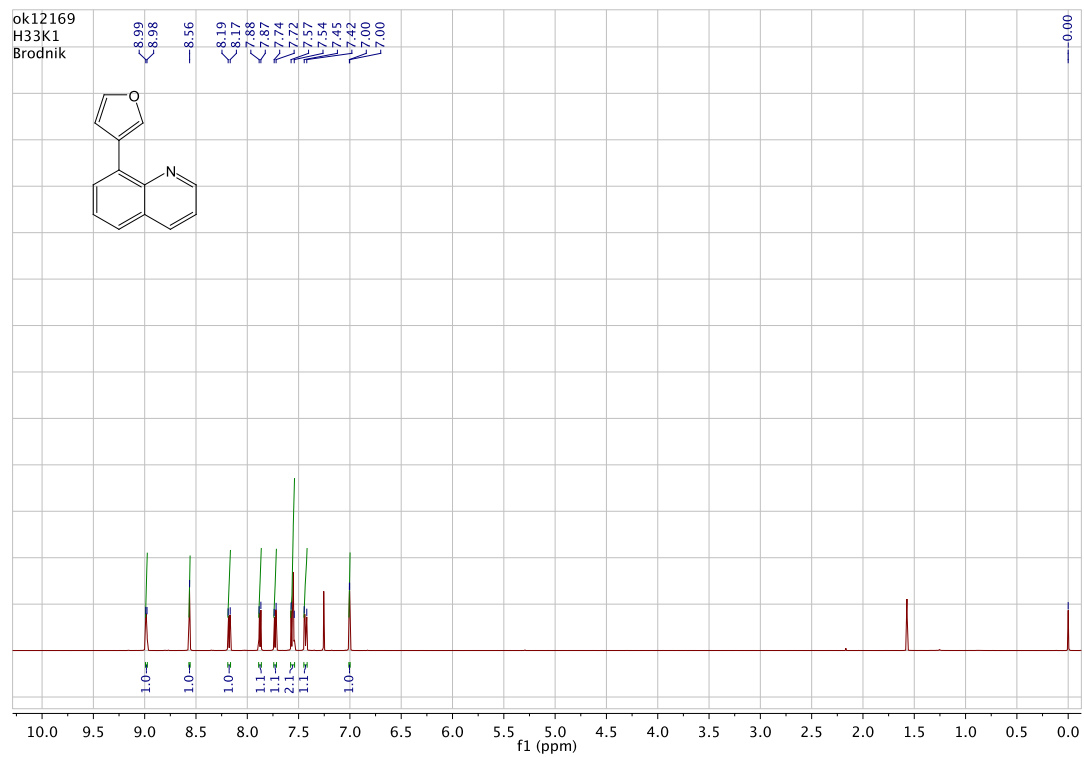

## <sup>13</sup>C NMR

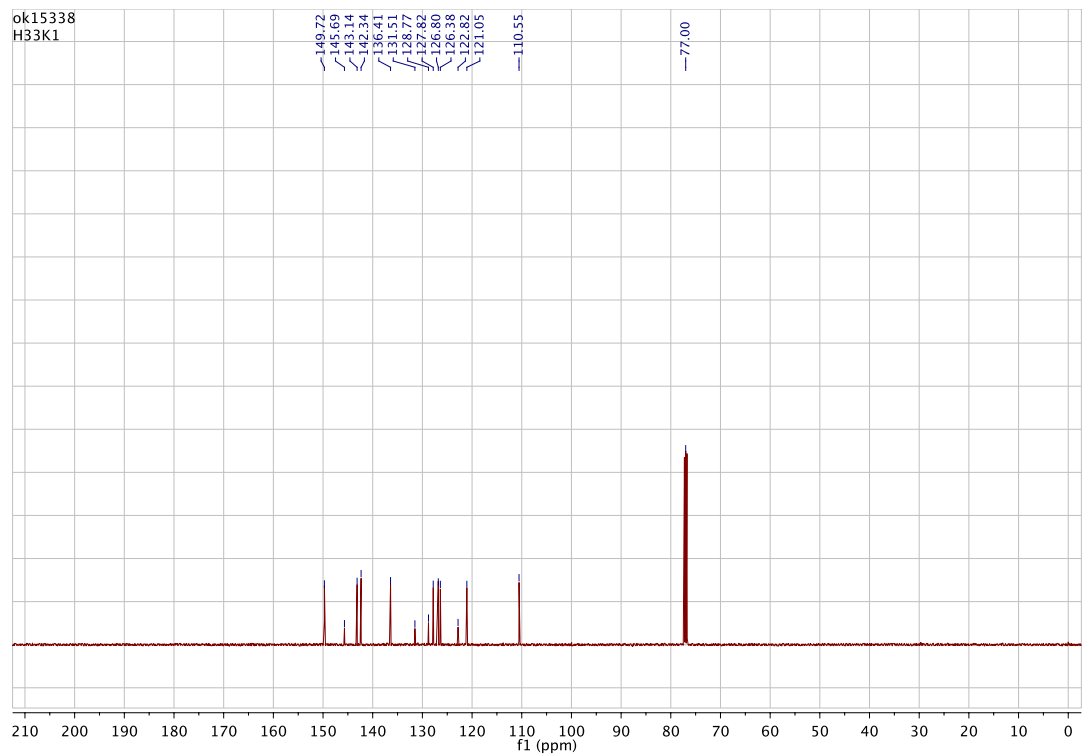

# Compound 4l

## <sup>1</sup>H NMR

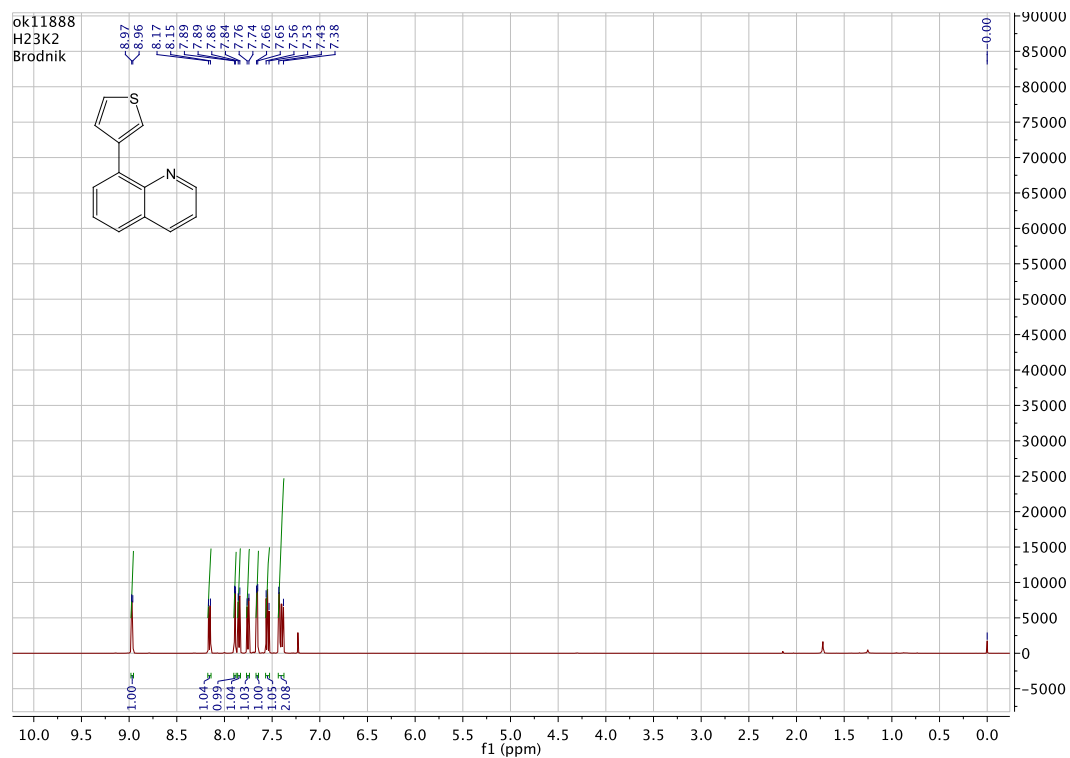

## <sup>13</sup>C NMR

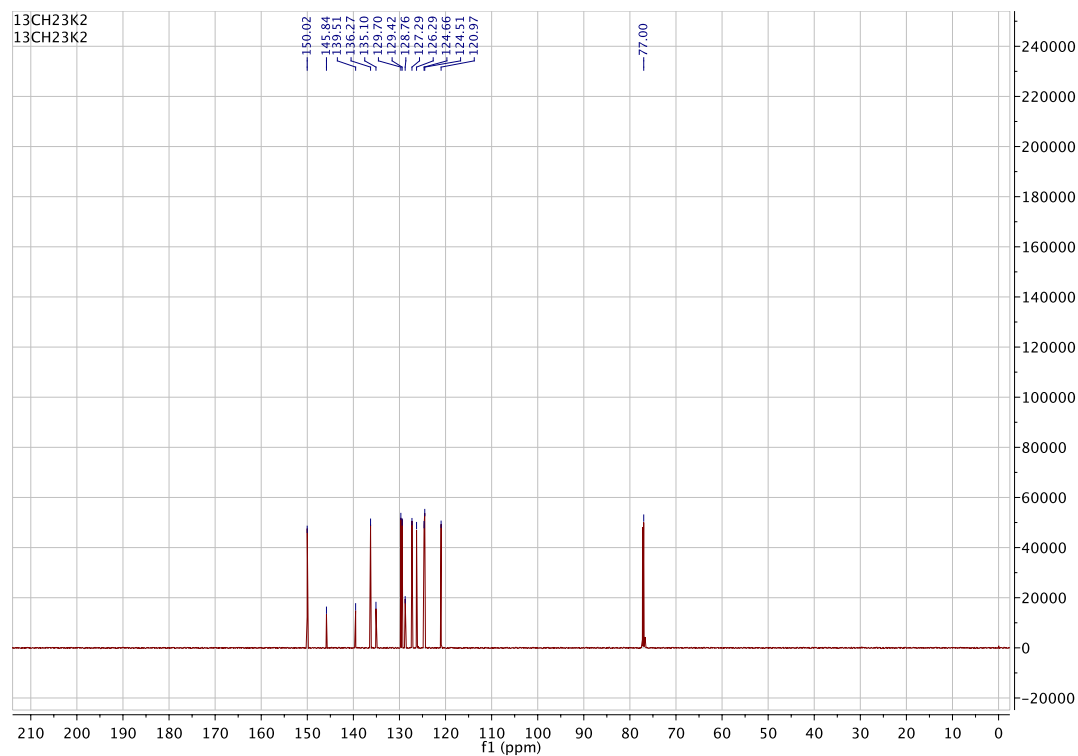



# Compound 4m

## <sup>1</sup>H NMR

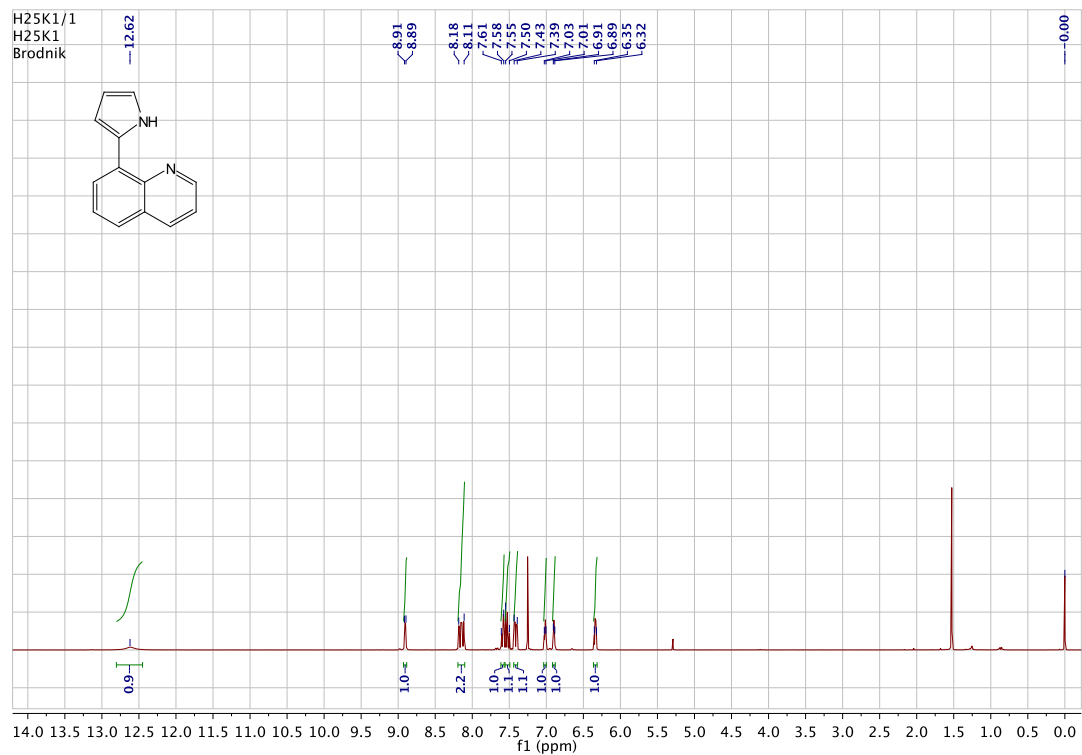

## <sup>13</sup>C NMR

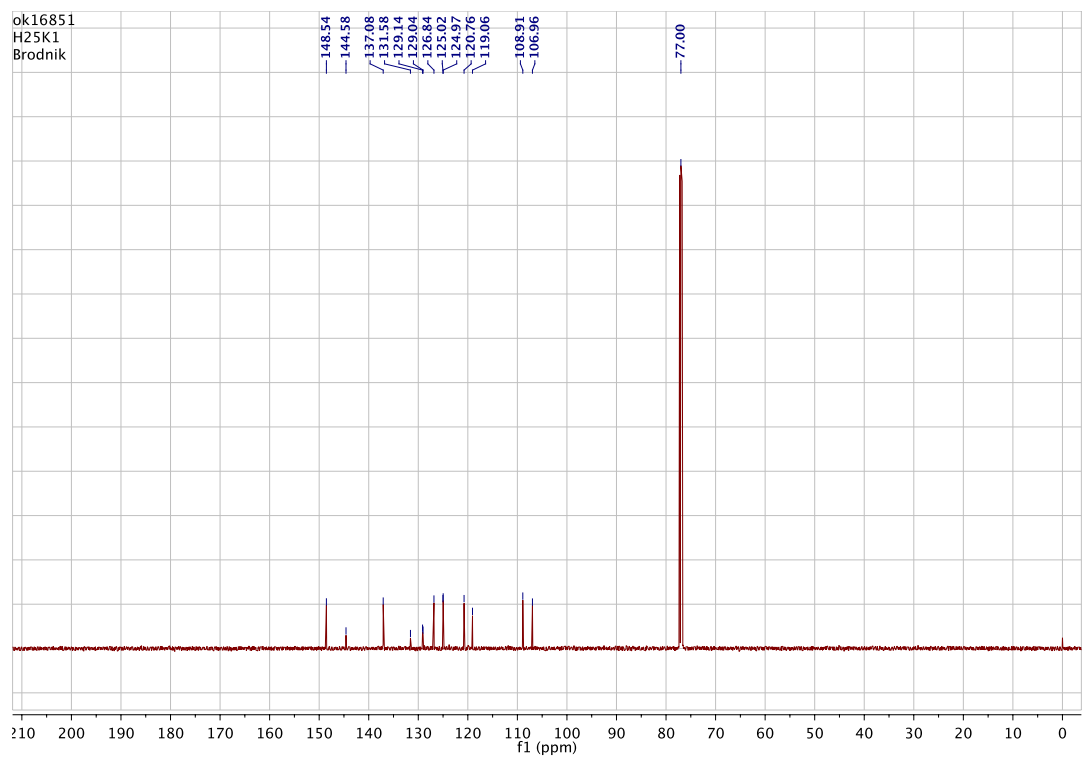

# Compound 4n

## <sup>1</sup>H NMR

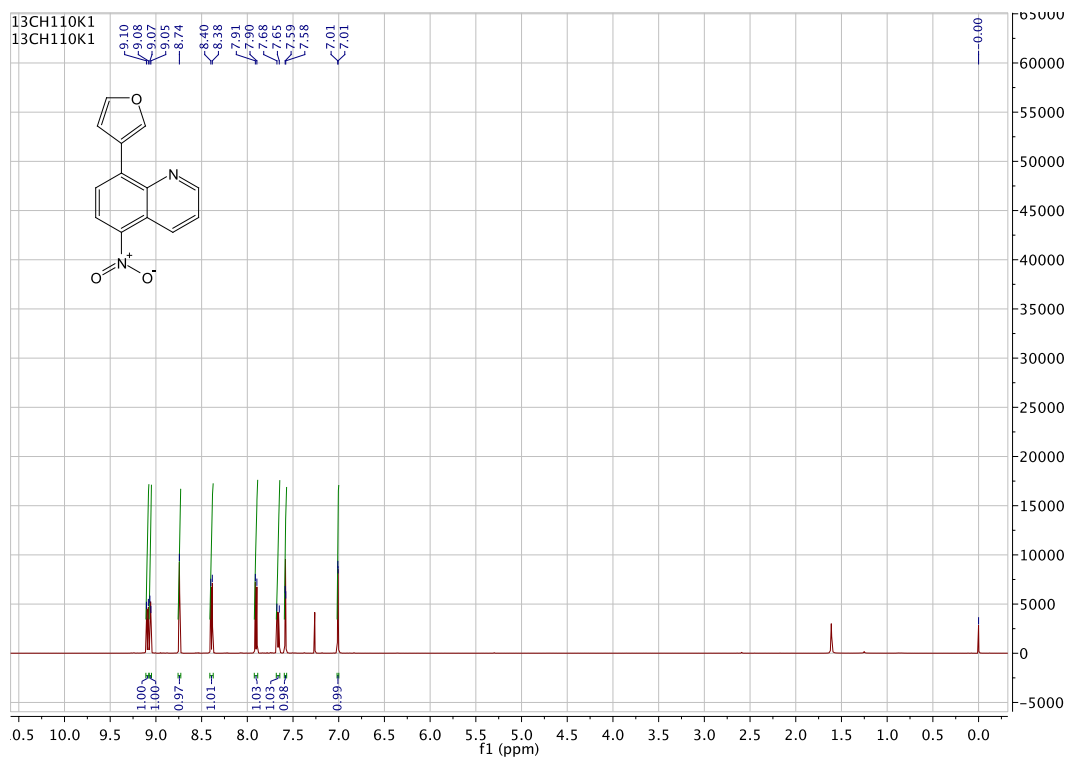

## <sup>13</sup>C NMR

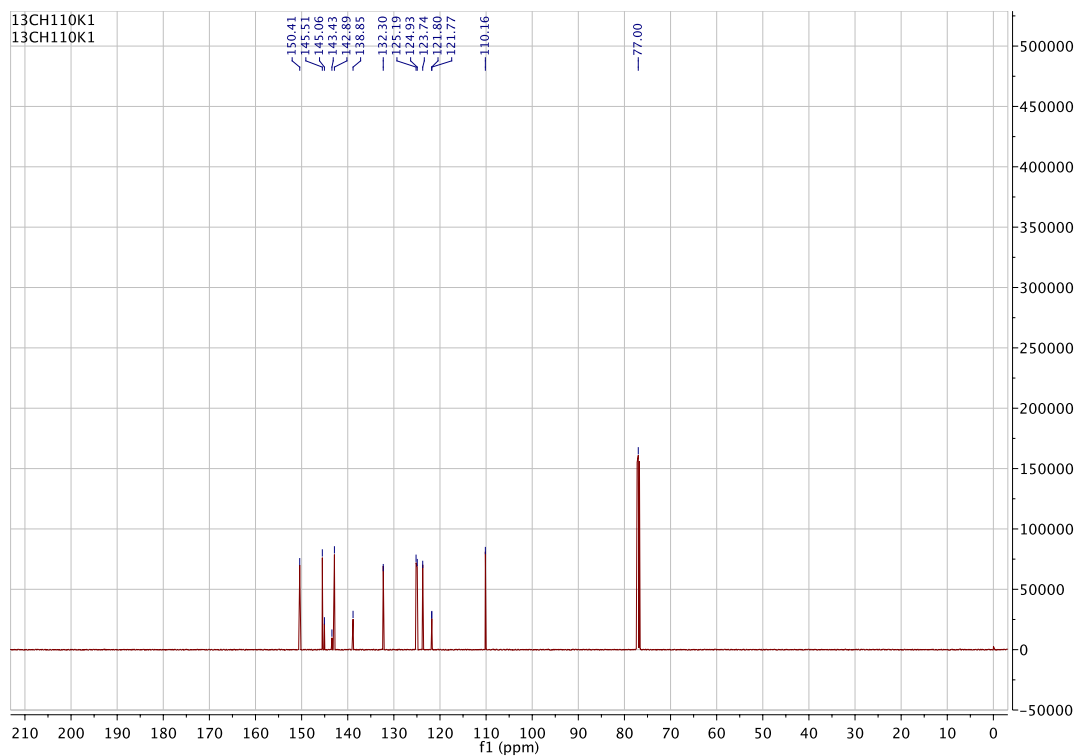

# Compound 4o

## <sup>1</sup>H NMR

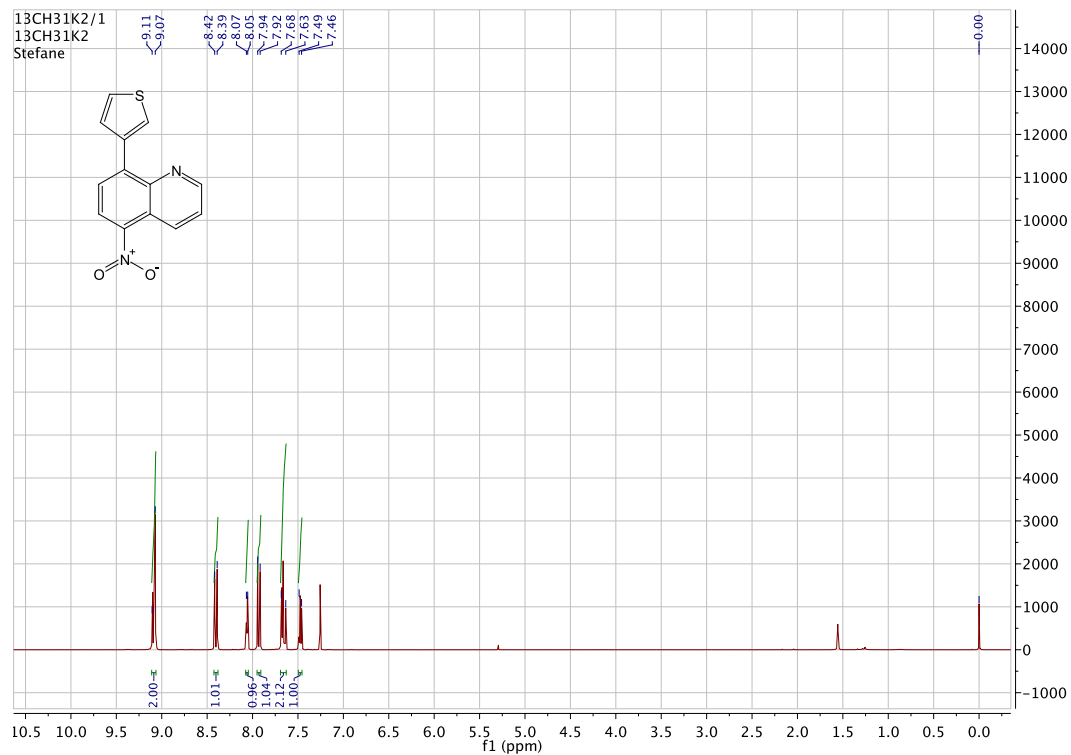

## <sup>13</sup>C NMR

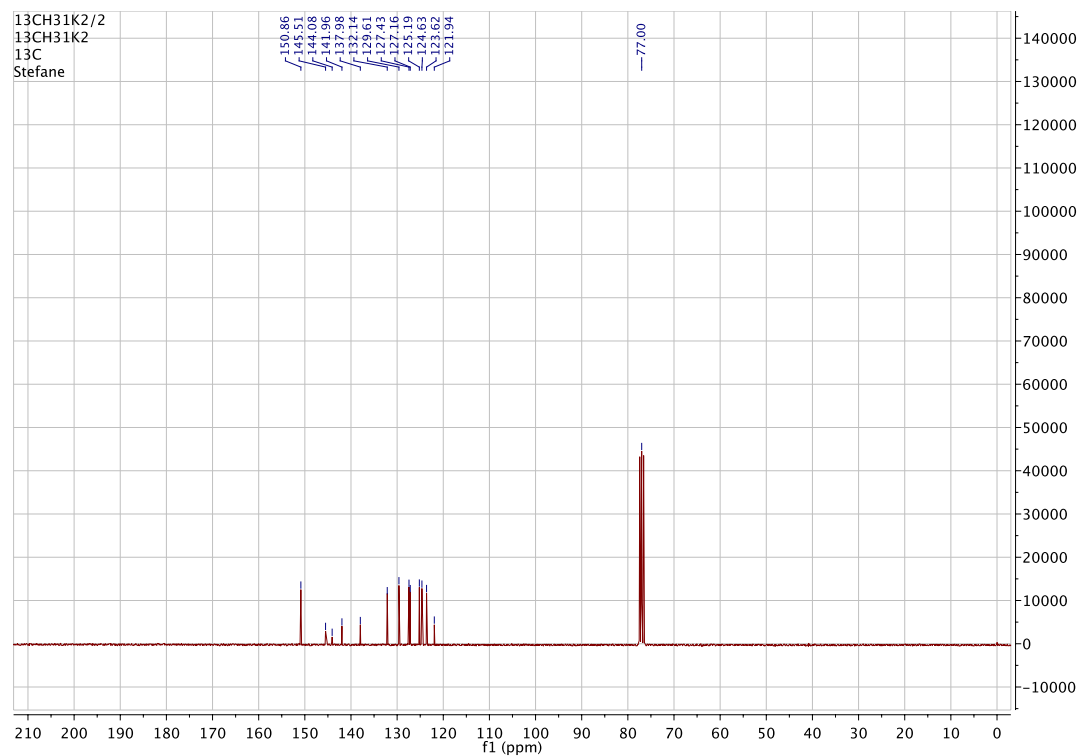

# Compound 4p

## <sup>1</sup>H NMR

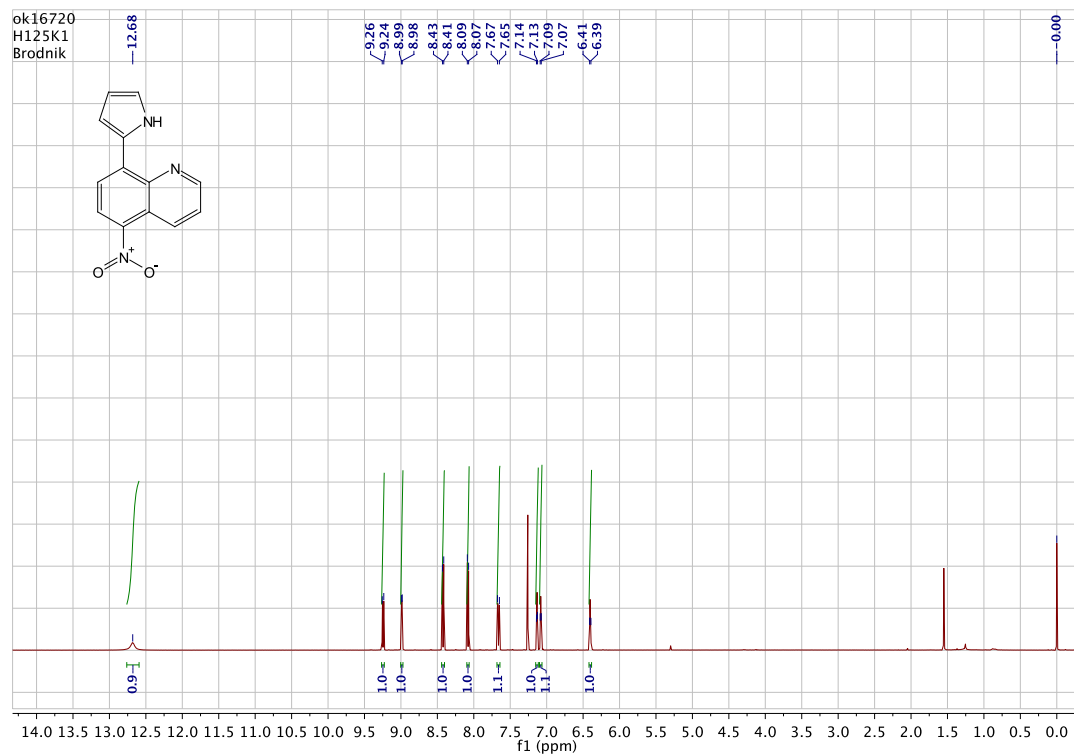

## <sup>13</sup>C NMR

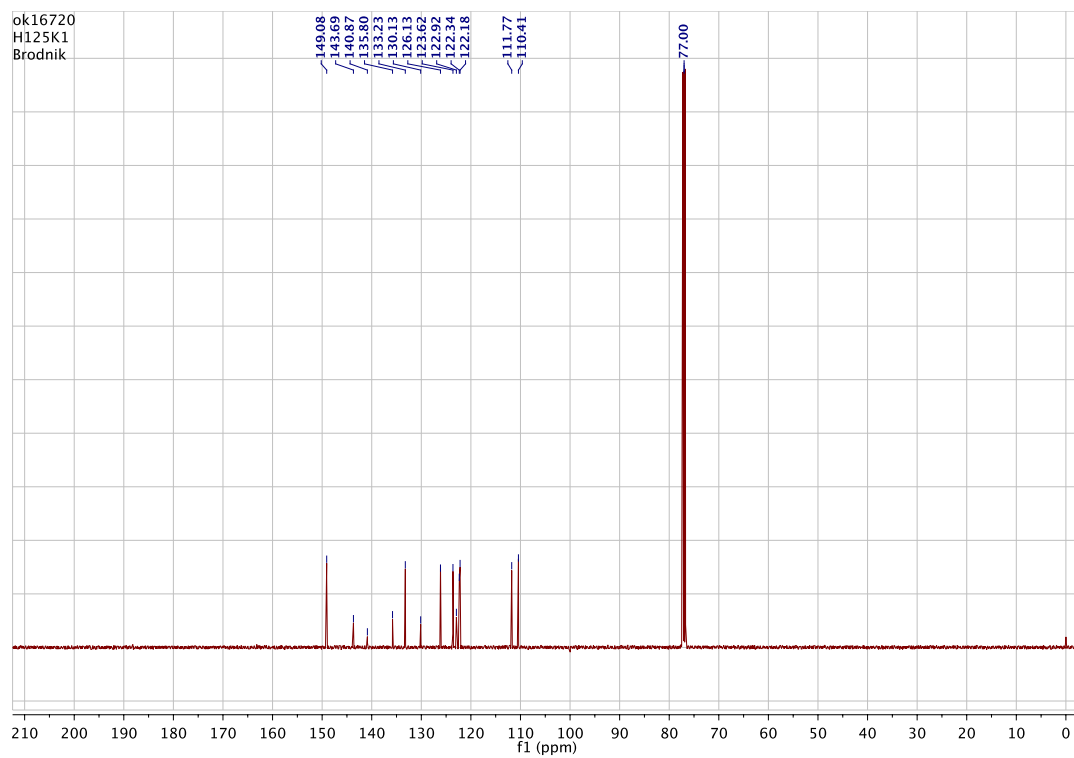

# Compound 4q

## <sup>1</sup>H NMR

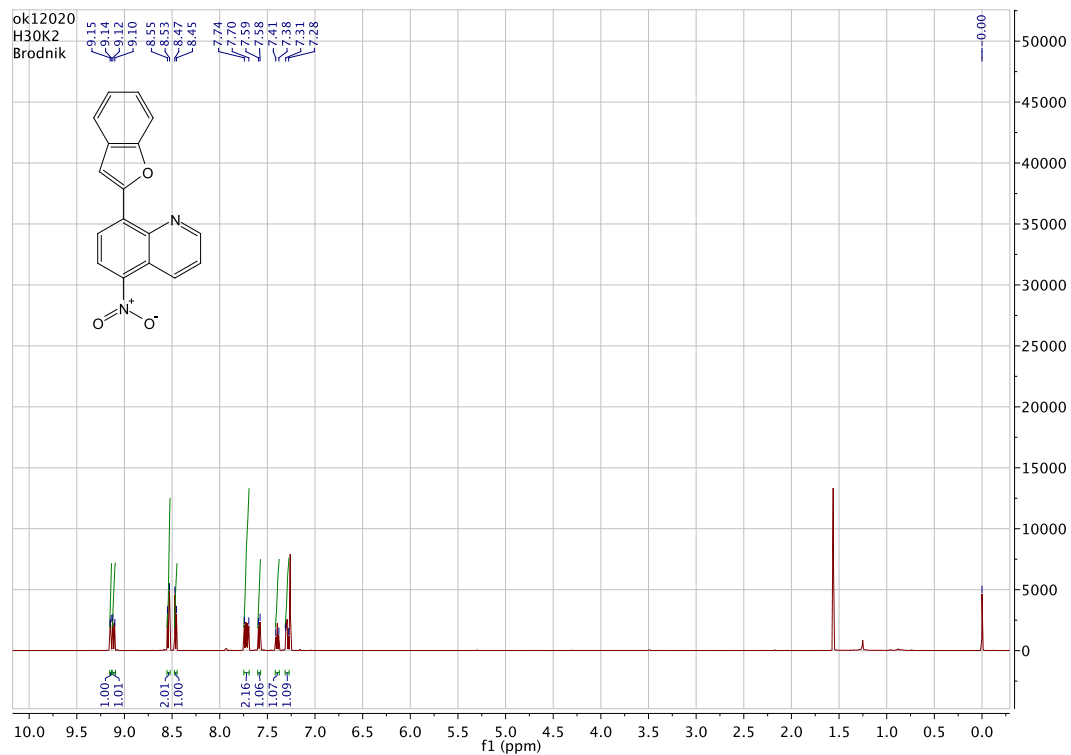

## <sup>13</sup>C NMR

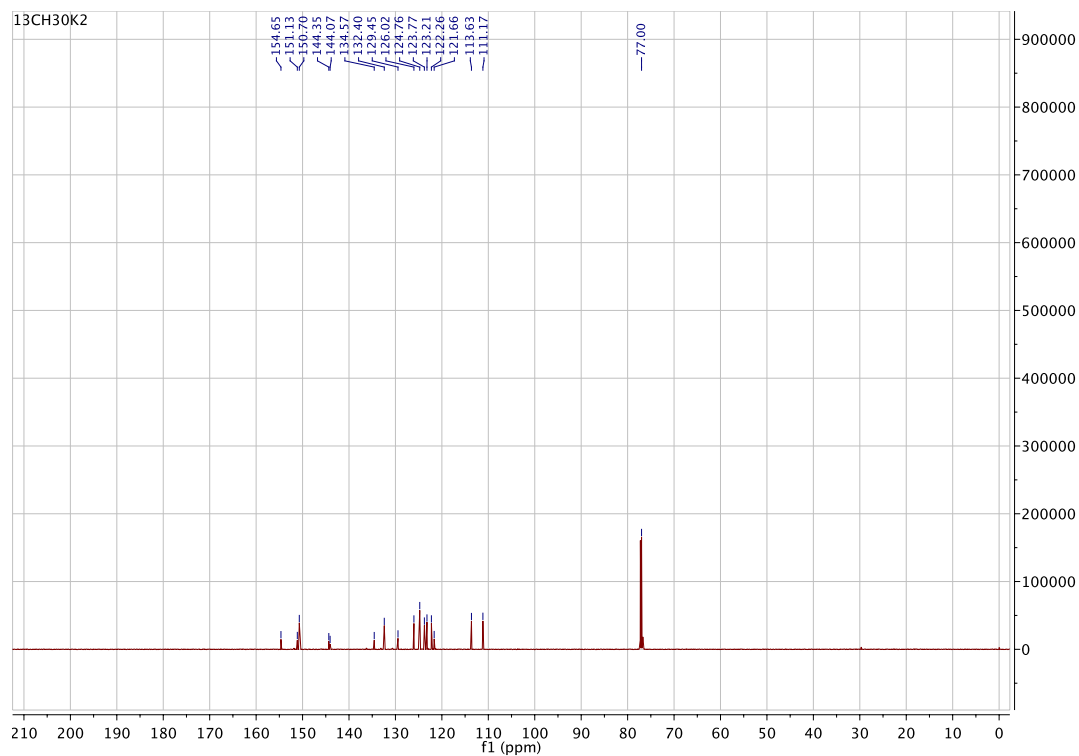

# Compound 4r

## <sup>1</sup>H NMR

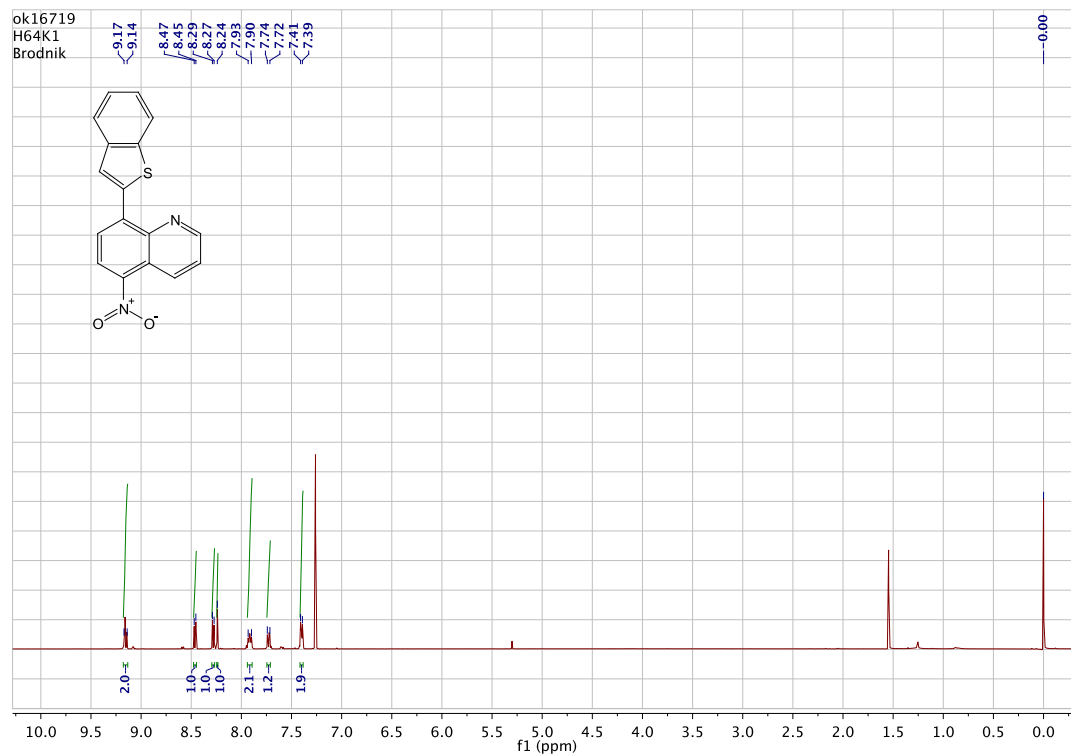

## <sup>13</sup>C NMR

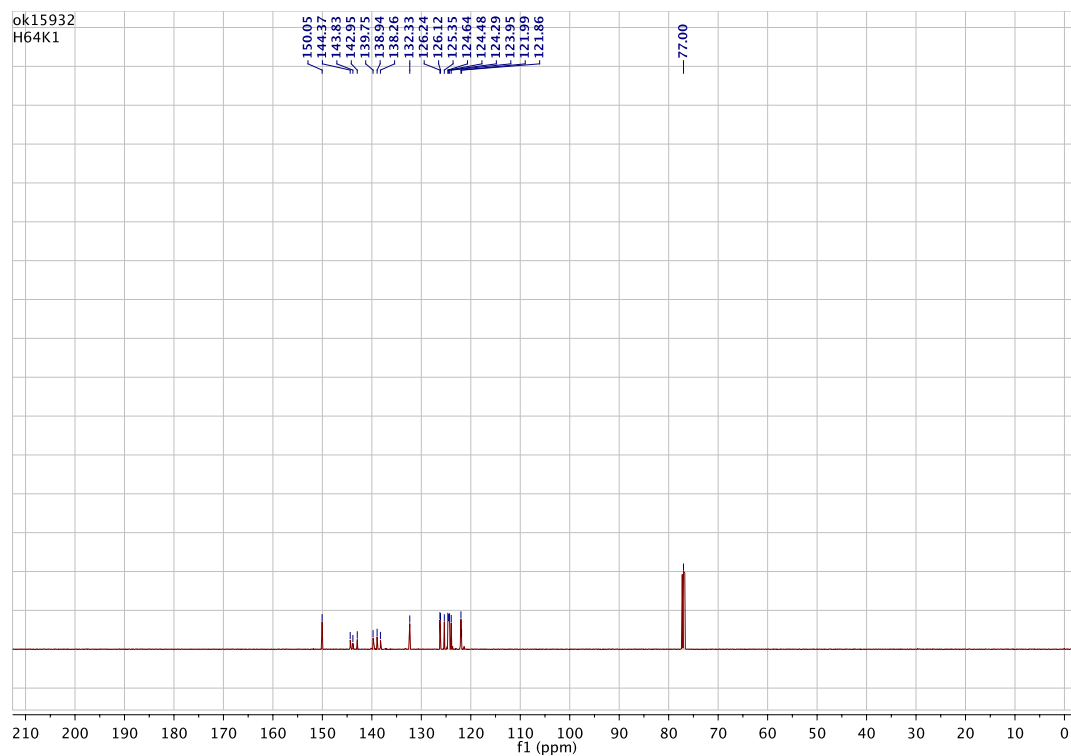

# Compound 4I'

## <sup>1</sup>H NMR

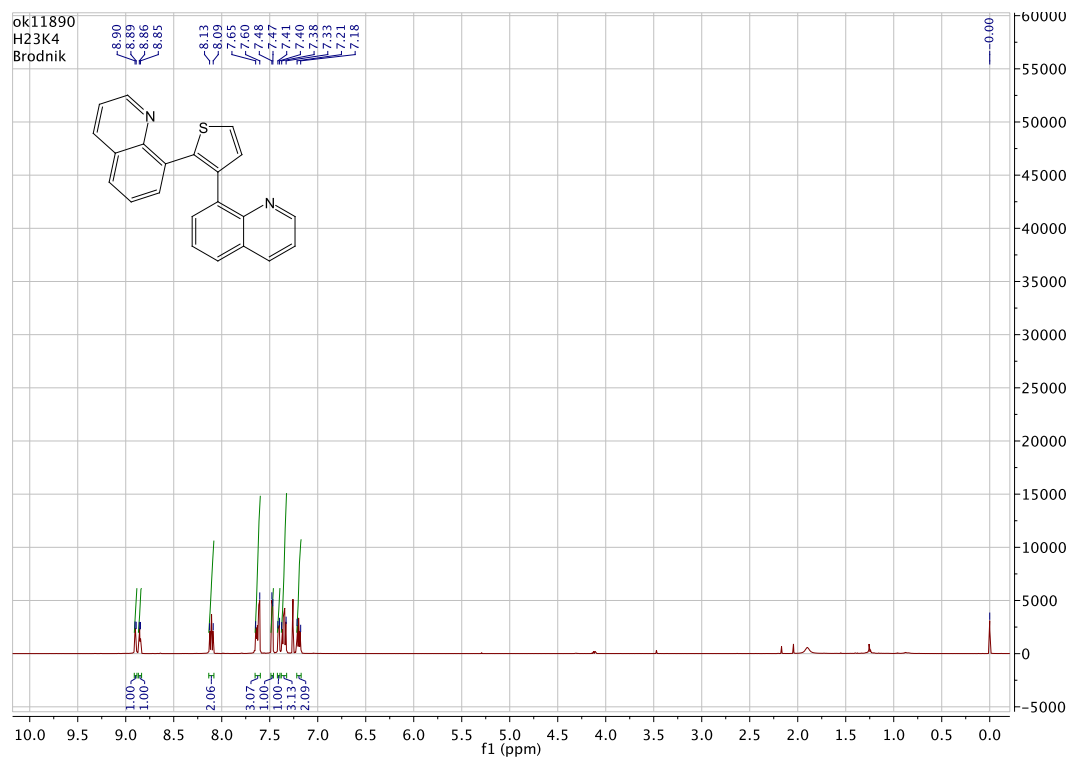

## <sup>13</sup>C NMR

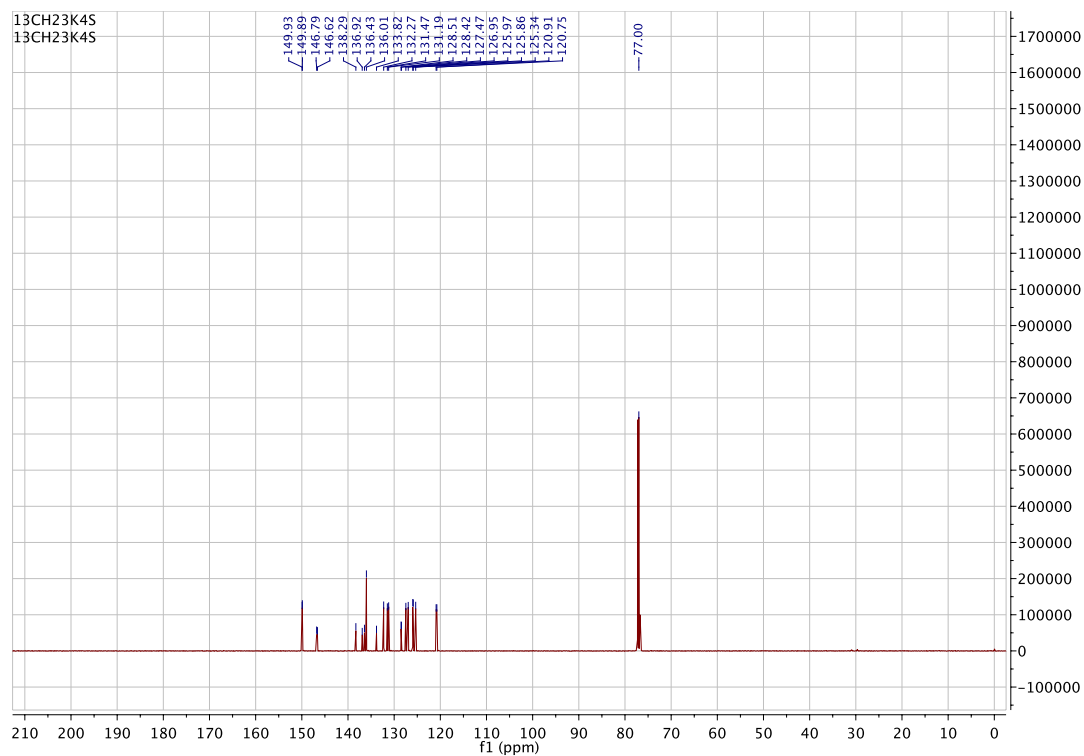

# Compound 7a

## <sup>1</sup>H NMR

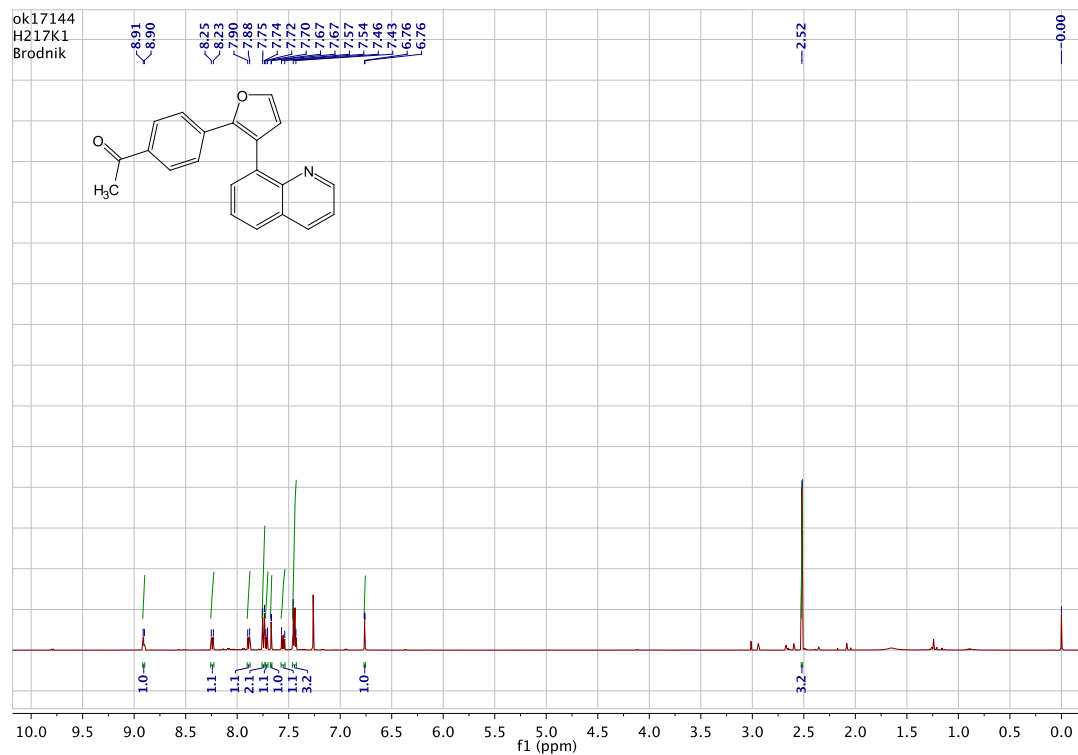

## <sup>13</sup>C NMR

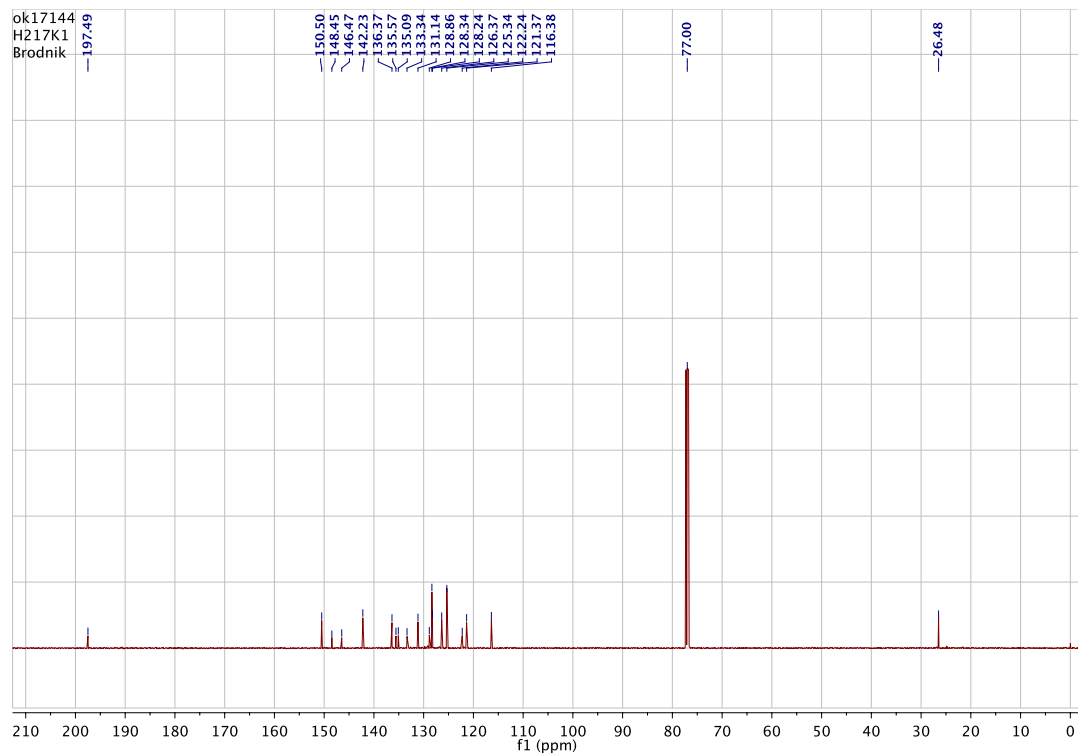



# Compound 7b

## <sup>1</sup>H NMR

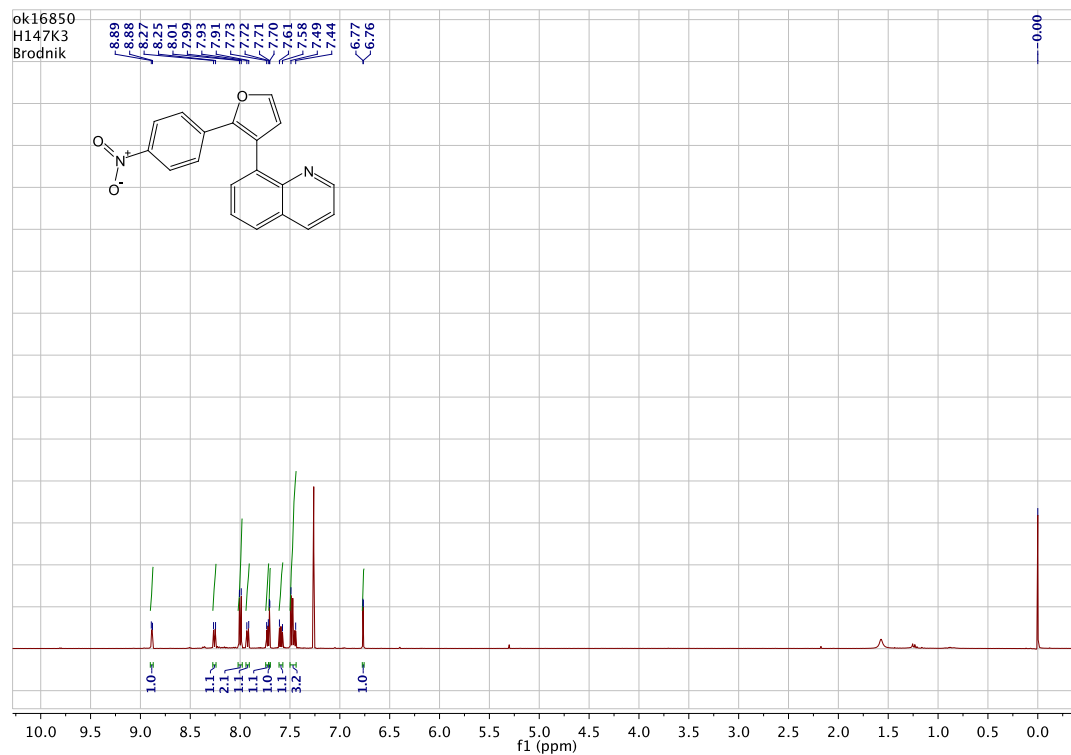

## <sup>13</sup>C NMR

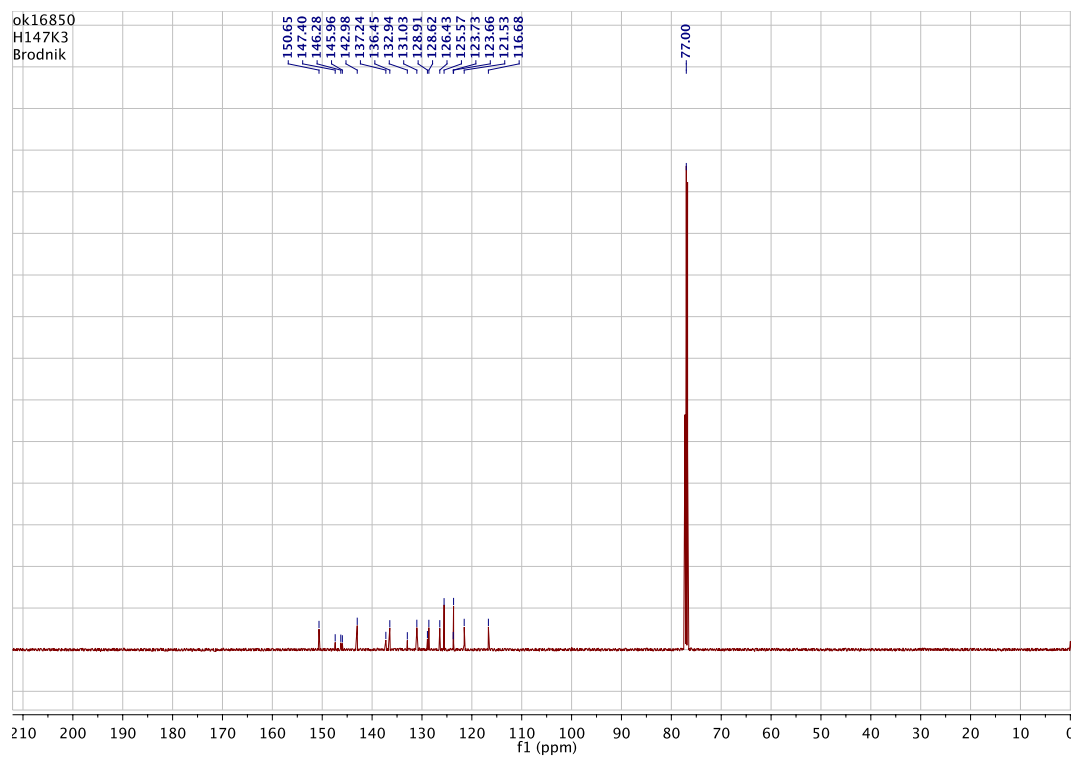

# Compound 7c

## <sup>1</sup>H NMR

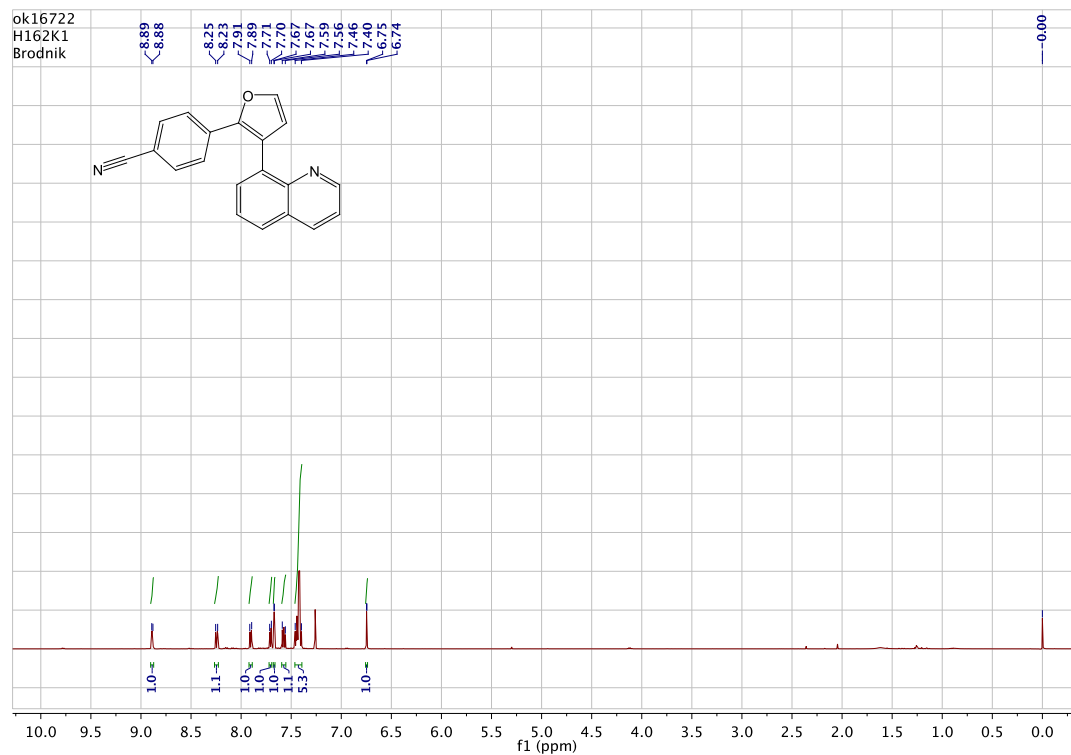

## <sup>13</sup>C NMR

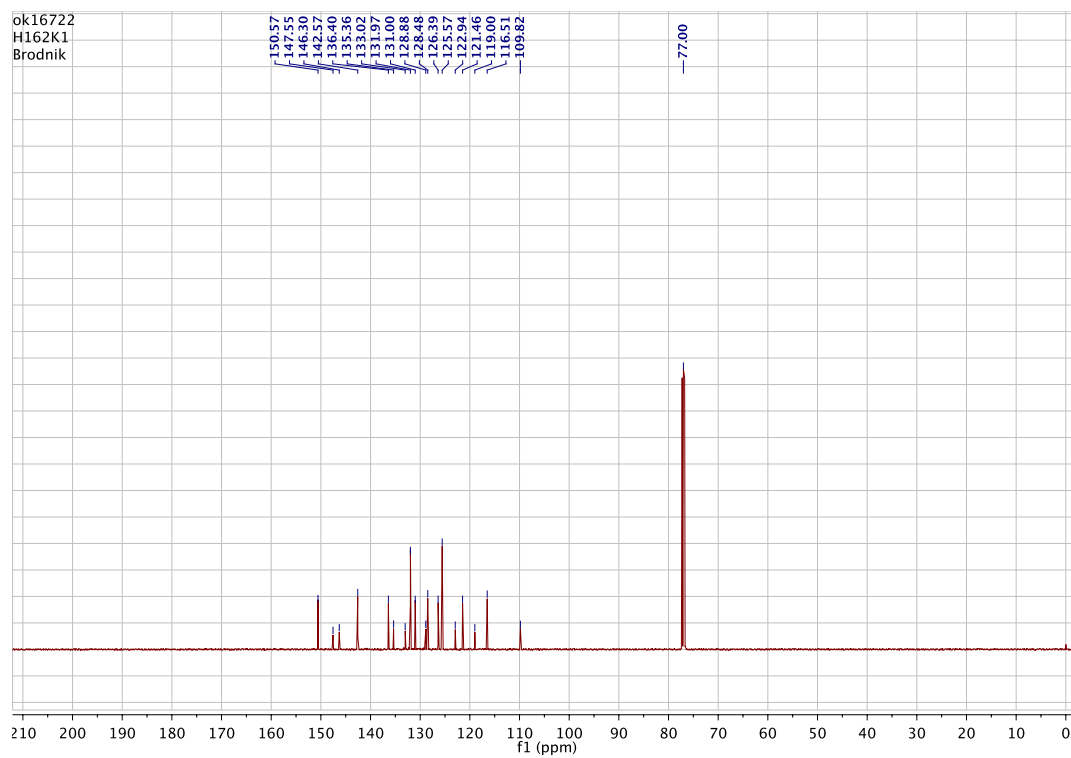

# Compound 7d

## <sup>1</sup>H NMR

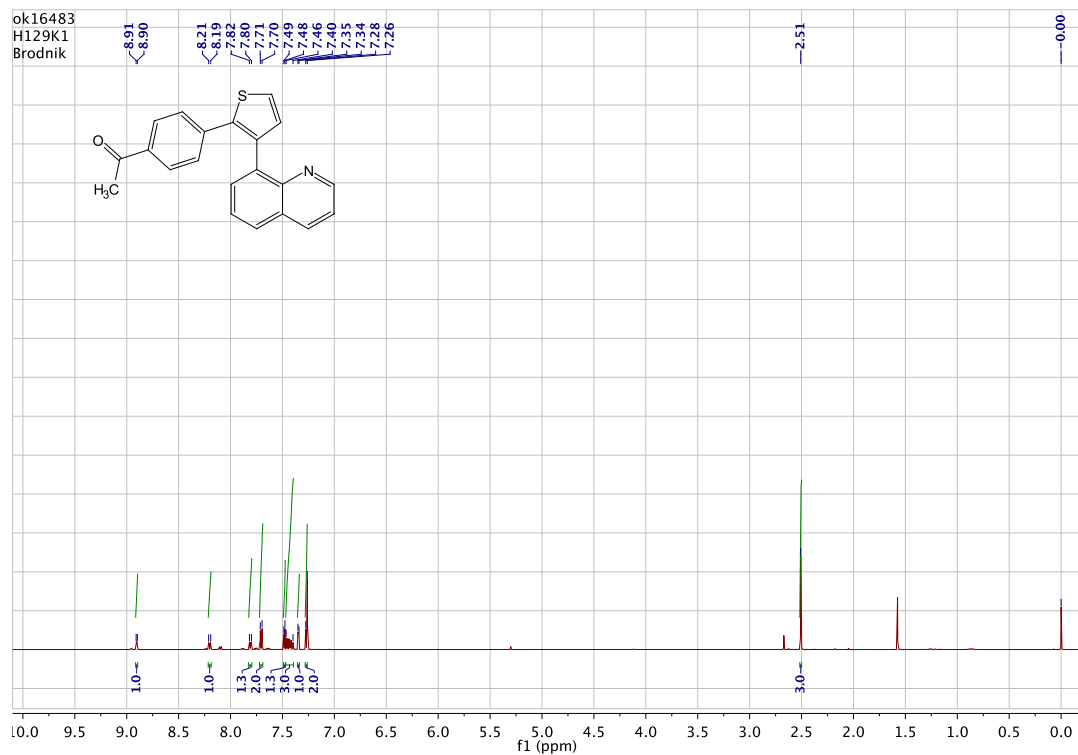

## <sup>13</sup>C NMR

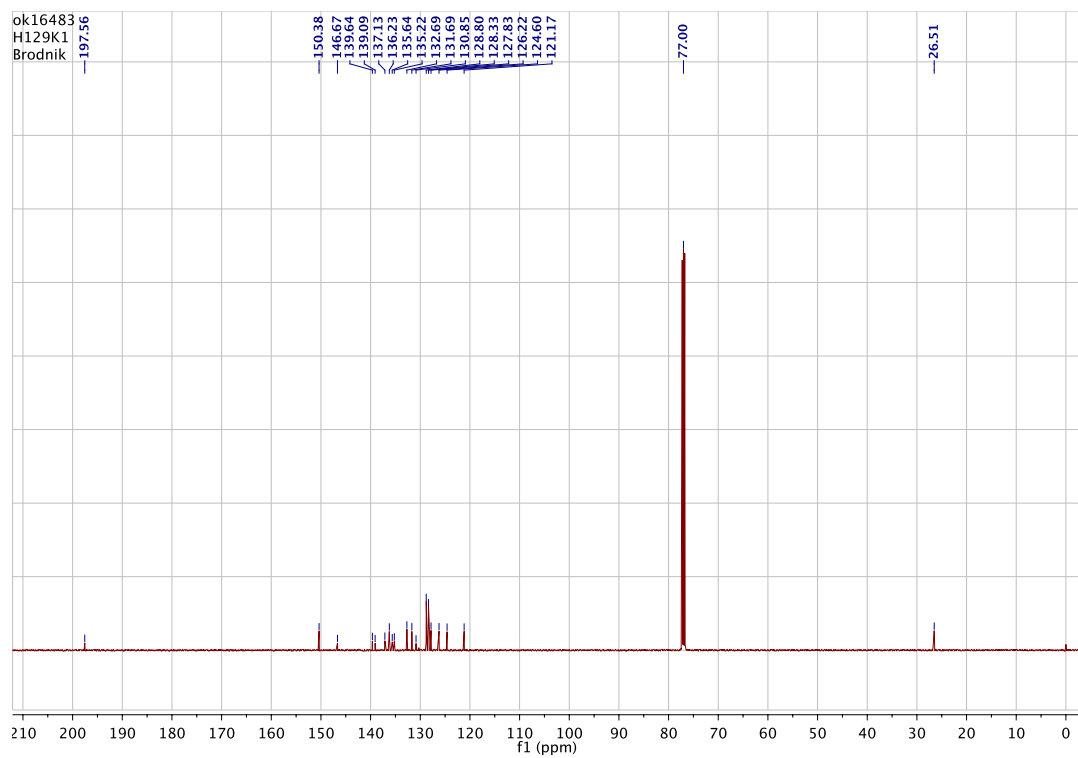

# Compound 7e

## <sup>1</sup>H NMR

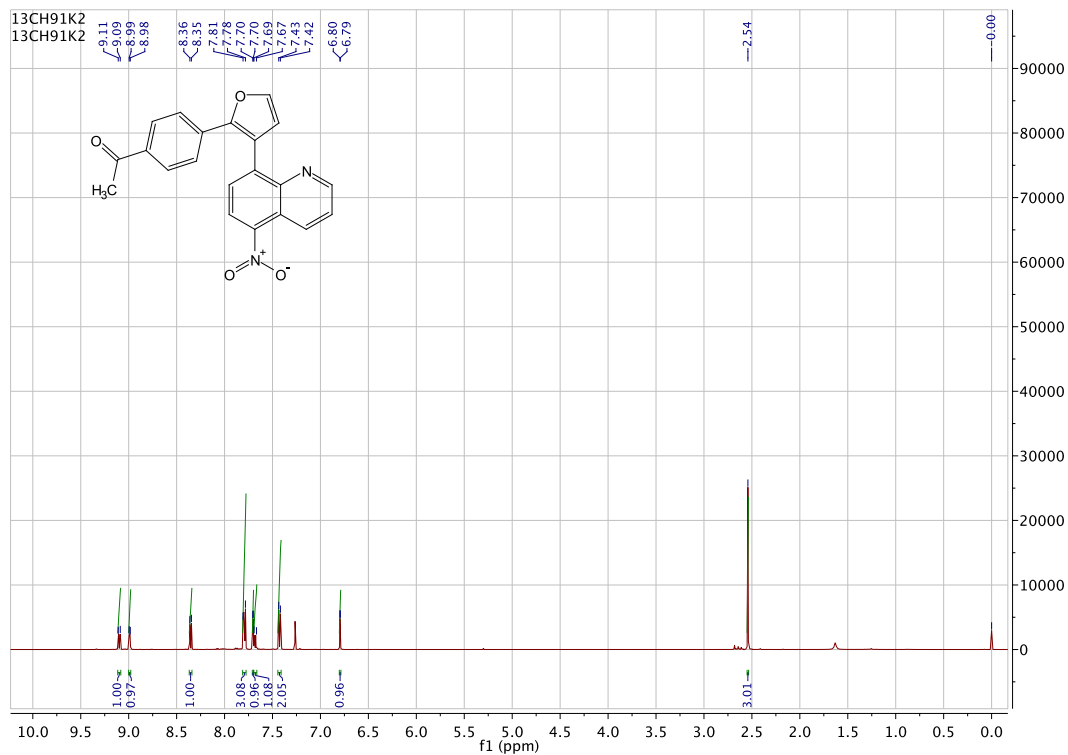

## <sup>13</sup>C NMR

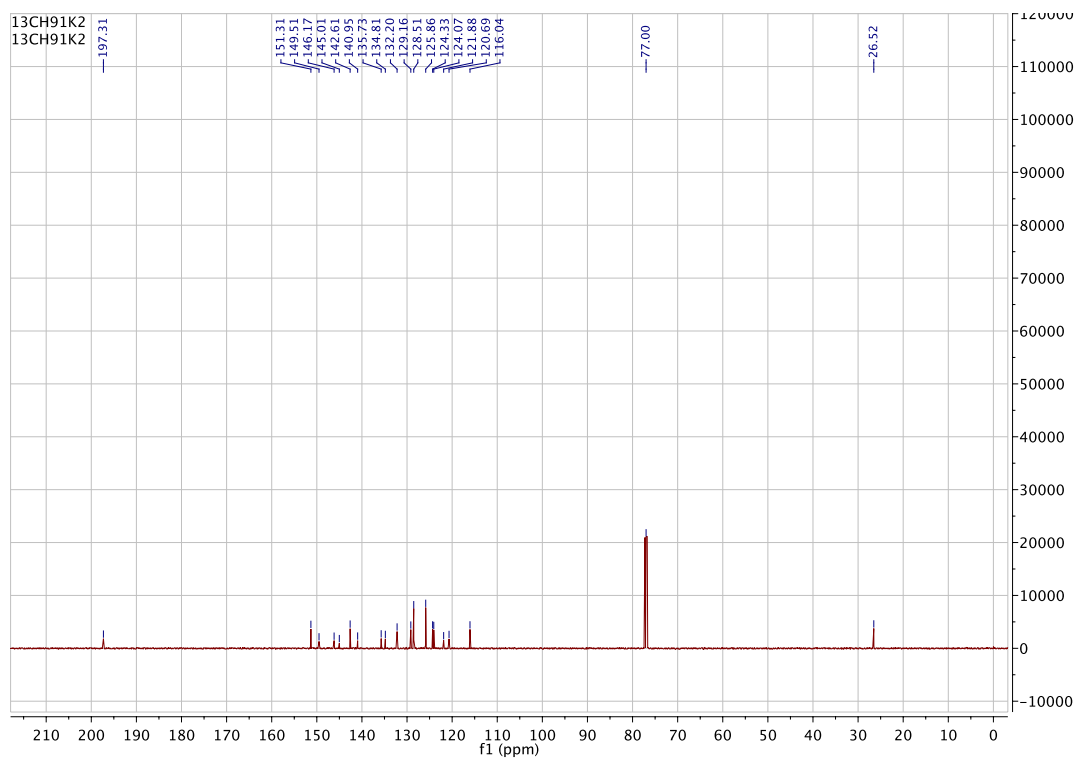

# Compound 7f

## <sup>1</sup>H NMR

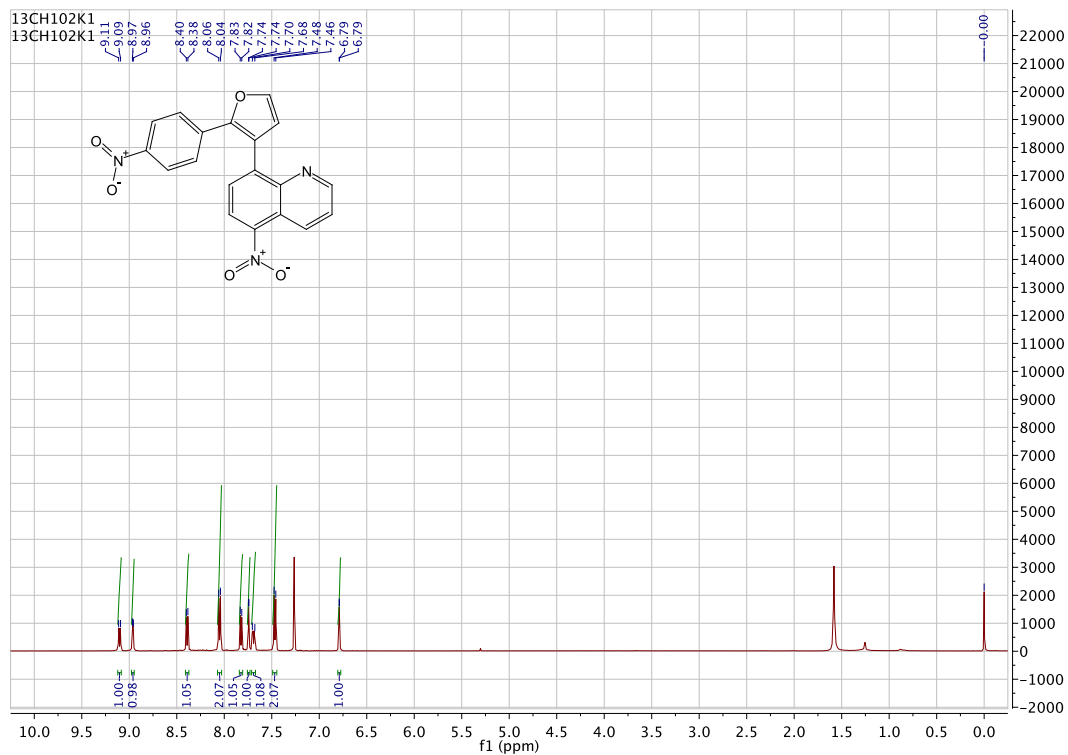

## <sup>13</sup>C NMR

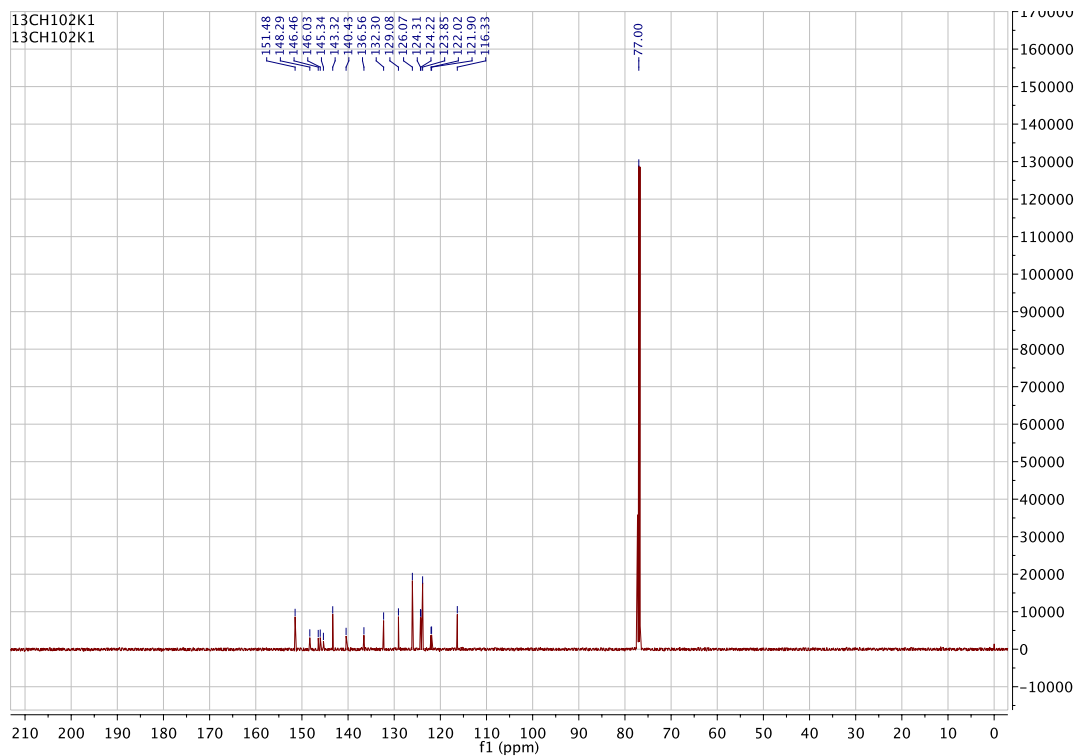

# Compound 7g

## <sup>1</sup>H NMR

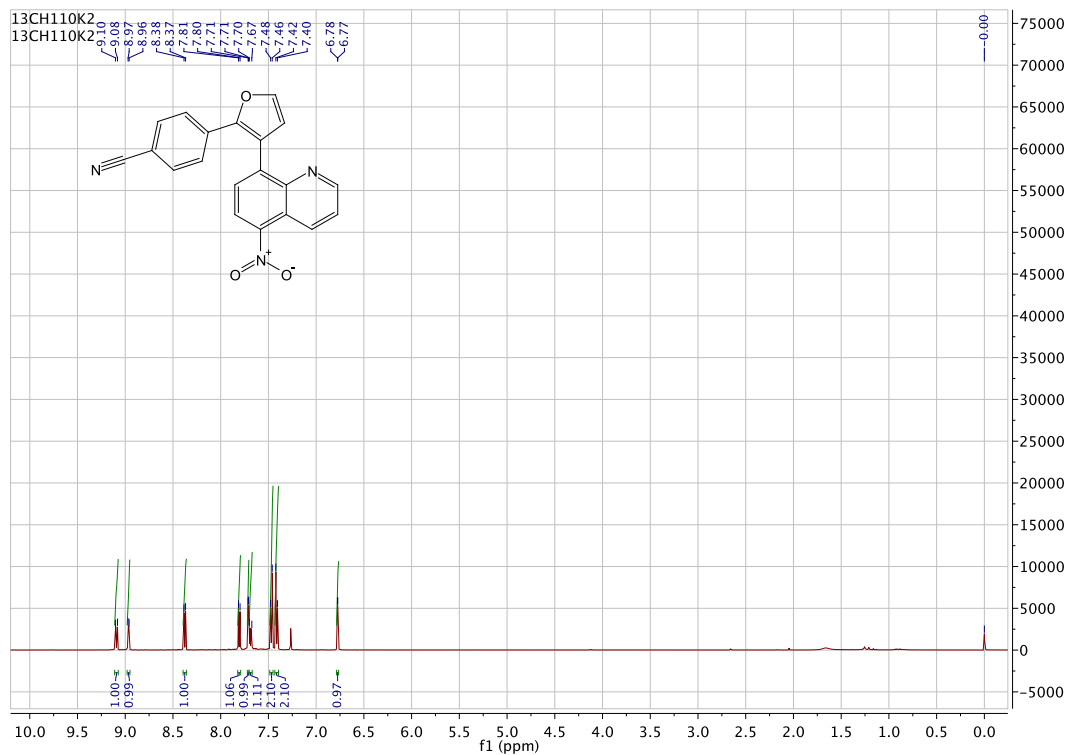

## <sup>13</sup>C NMR

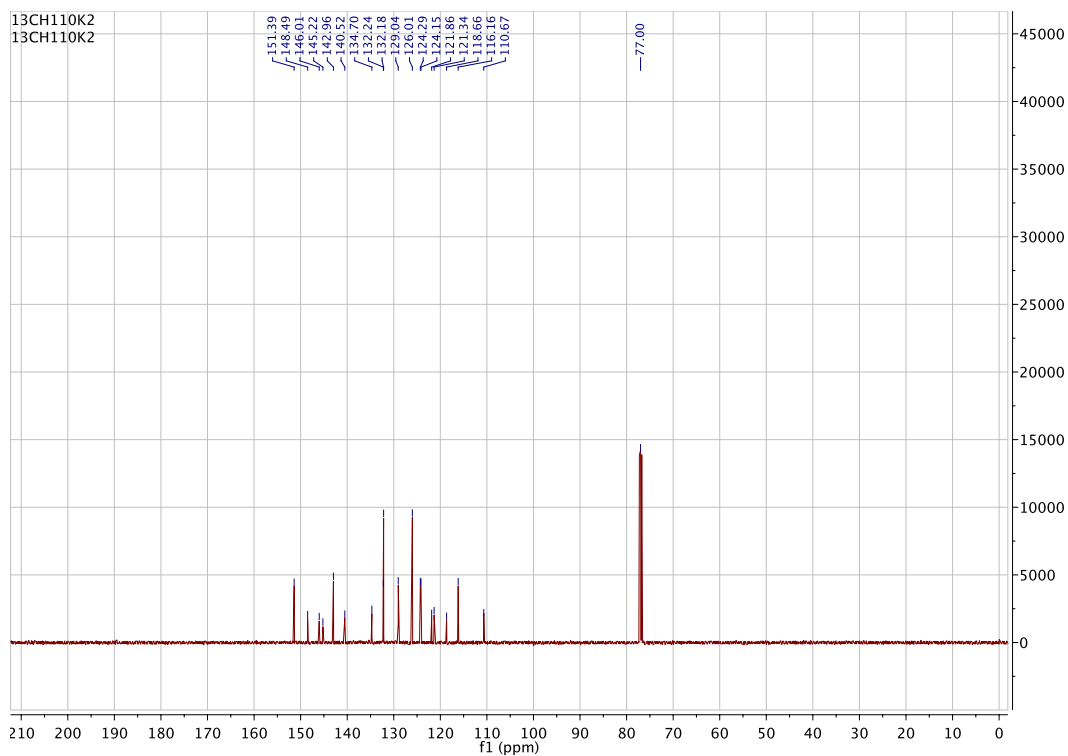

# Compound 7h

## <sup>1</sup>H NMR

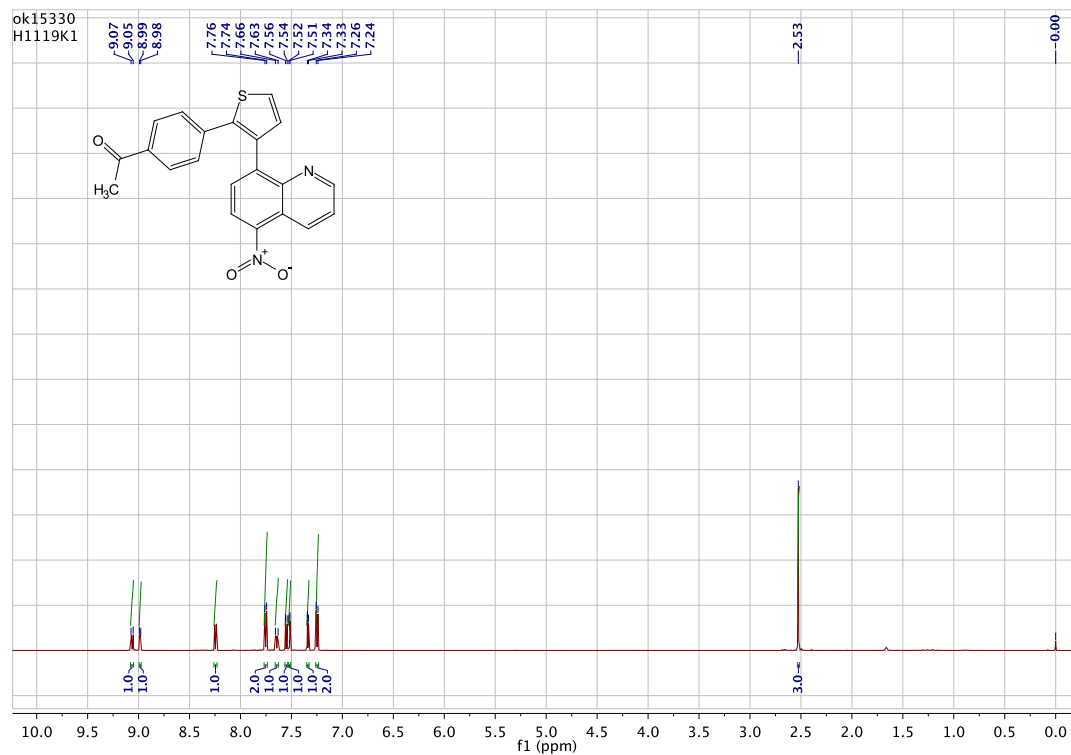

## <sup>13</sup>C NMR

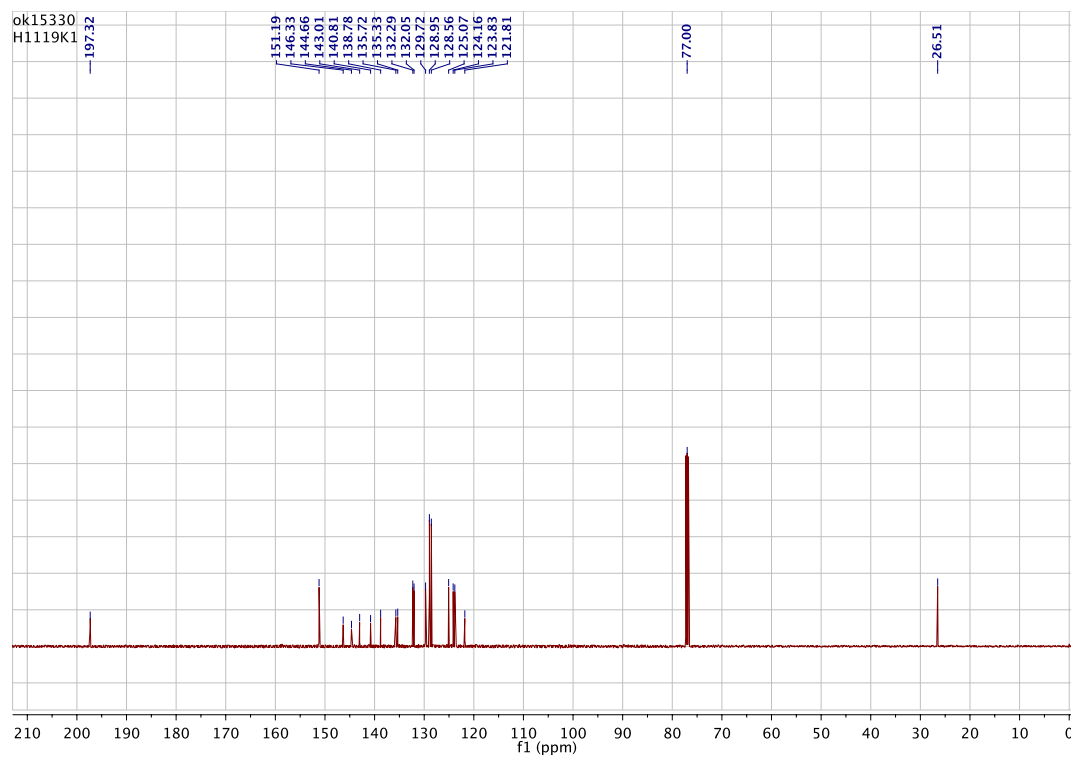

# Compound 7ca

## <sup>1</sup>H NMR

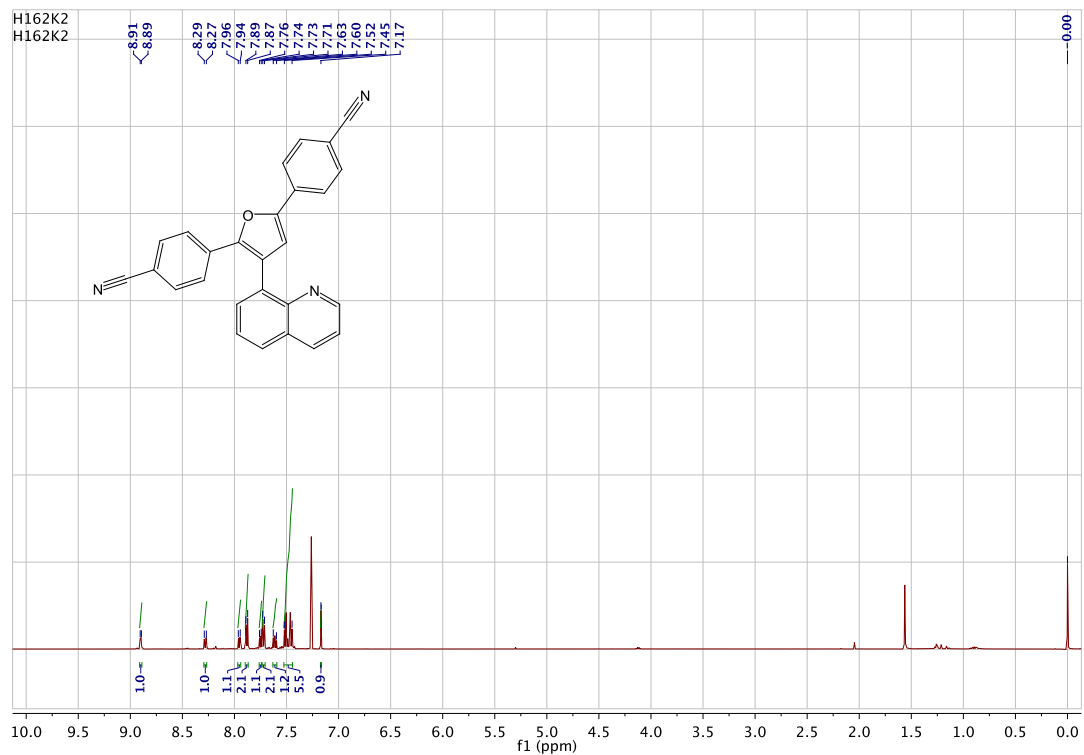

## <sup>13</sup>C NMR

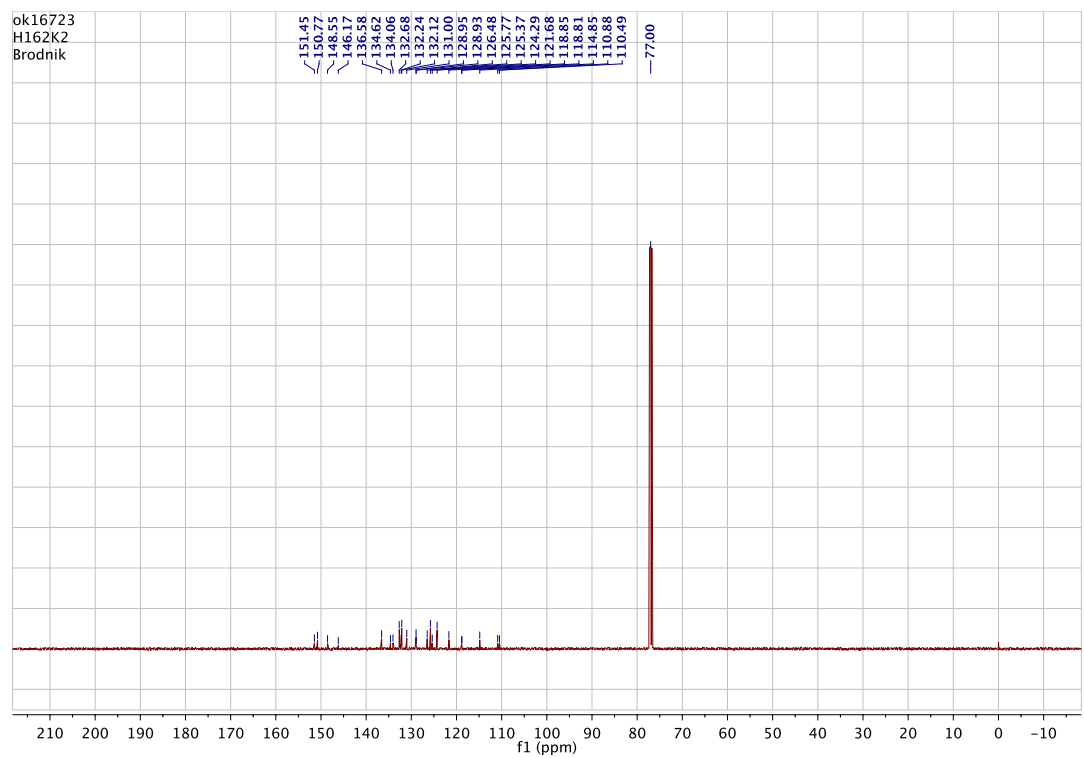



# Compound 7ea

## <sup>1</sup>H NMR

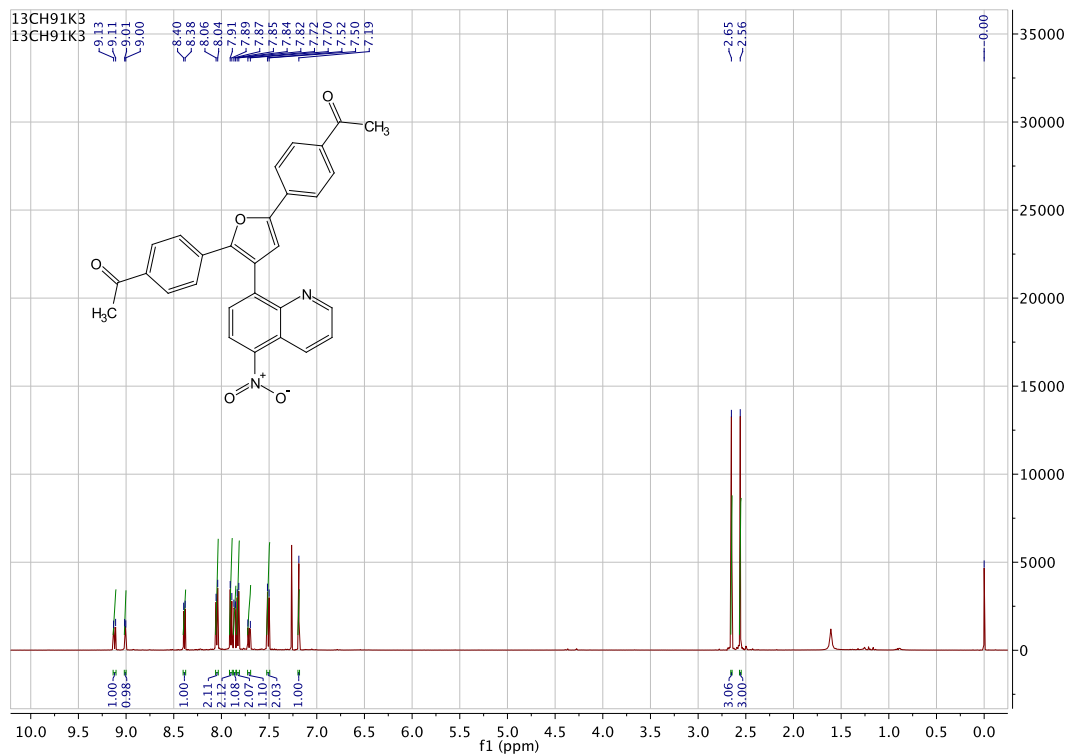

## <sup>13</sup>C NMR

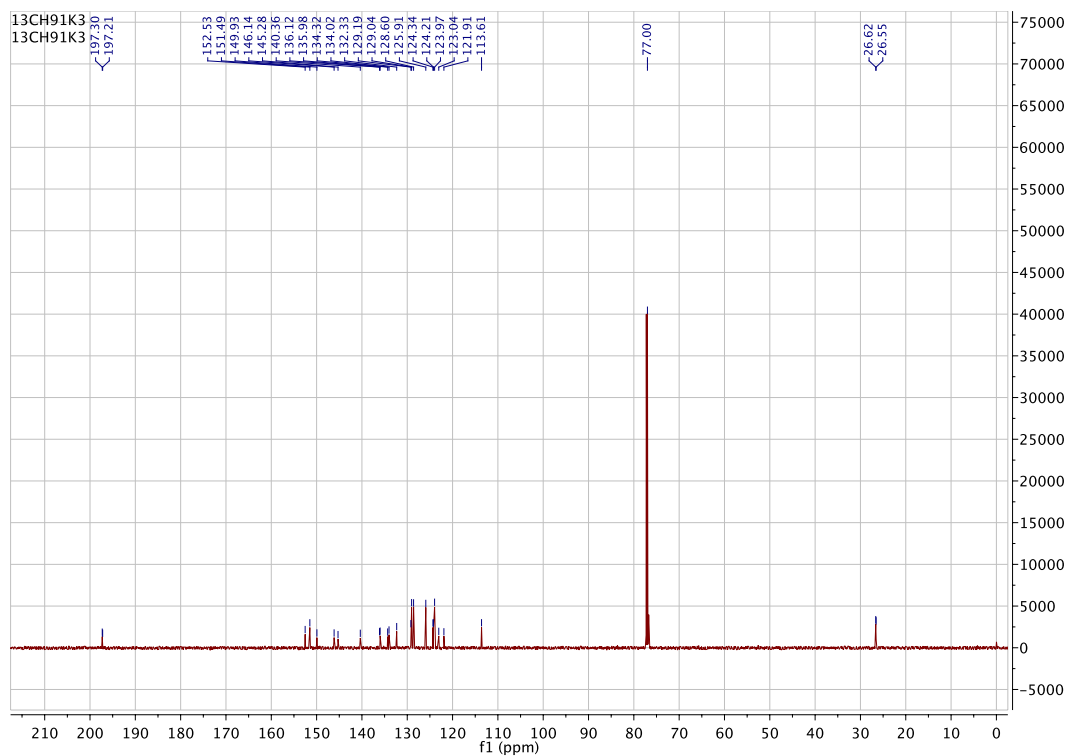

# Compound 7i

## <sup>1</sup>H NMR

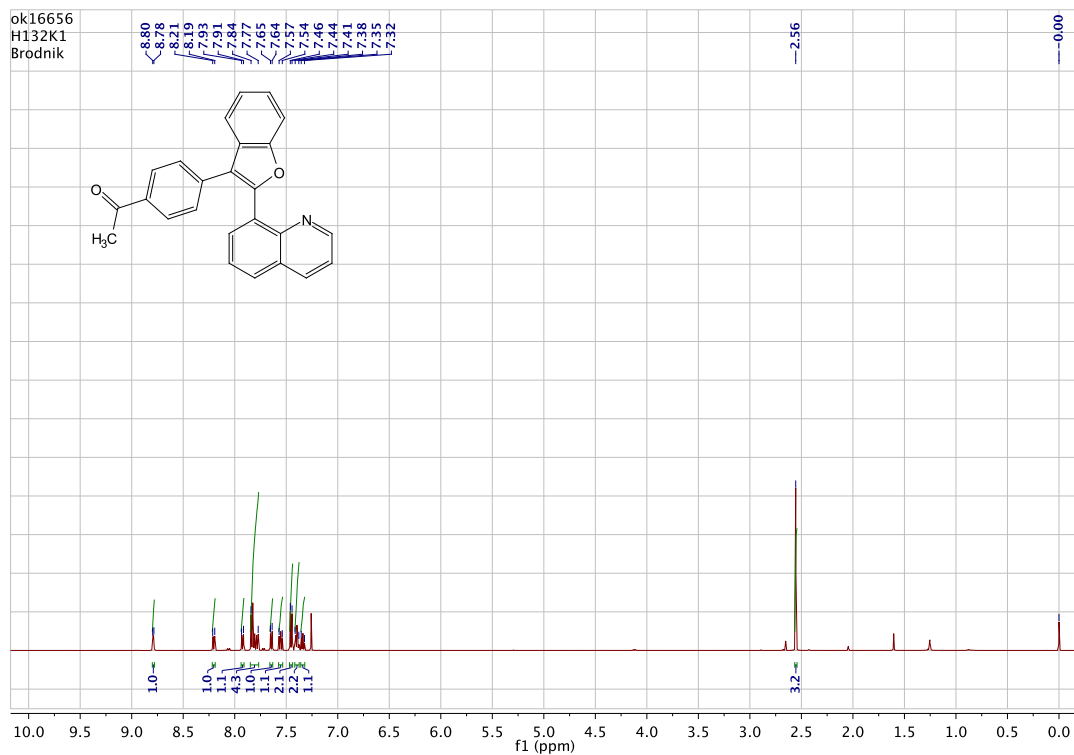

## <sup>13</sup>C NMR

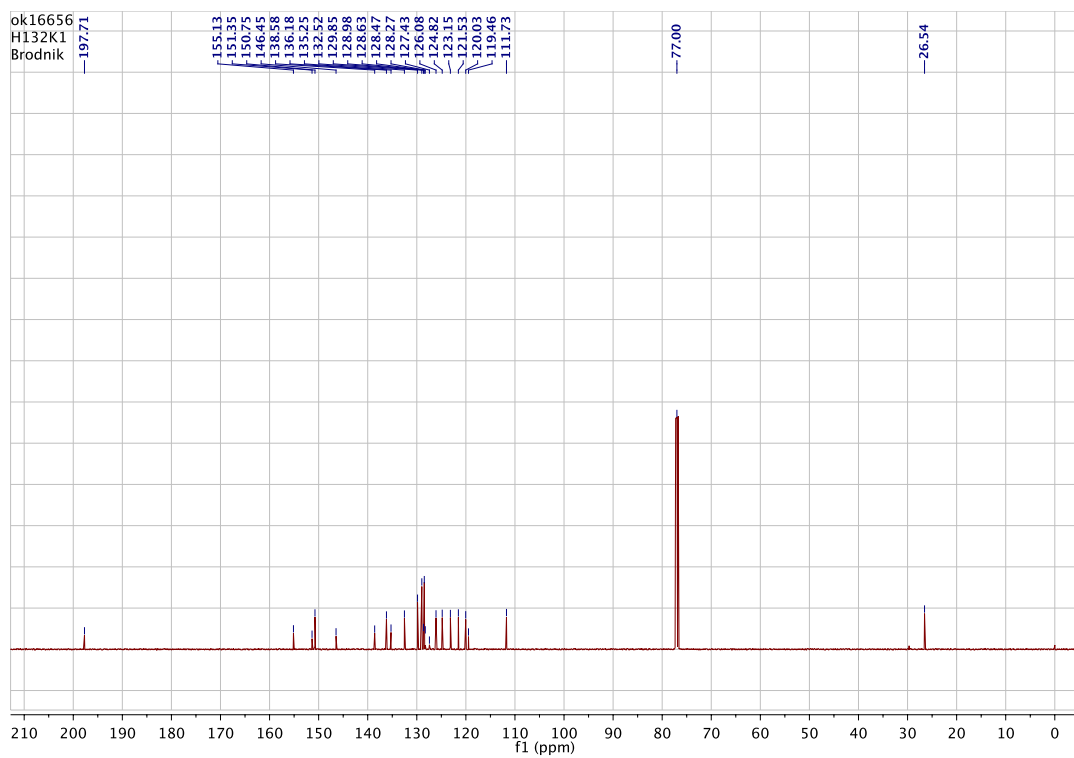

# Compound 7j

## <sup>1</sup>H NMR

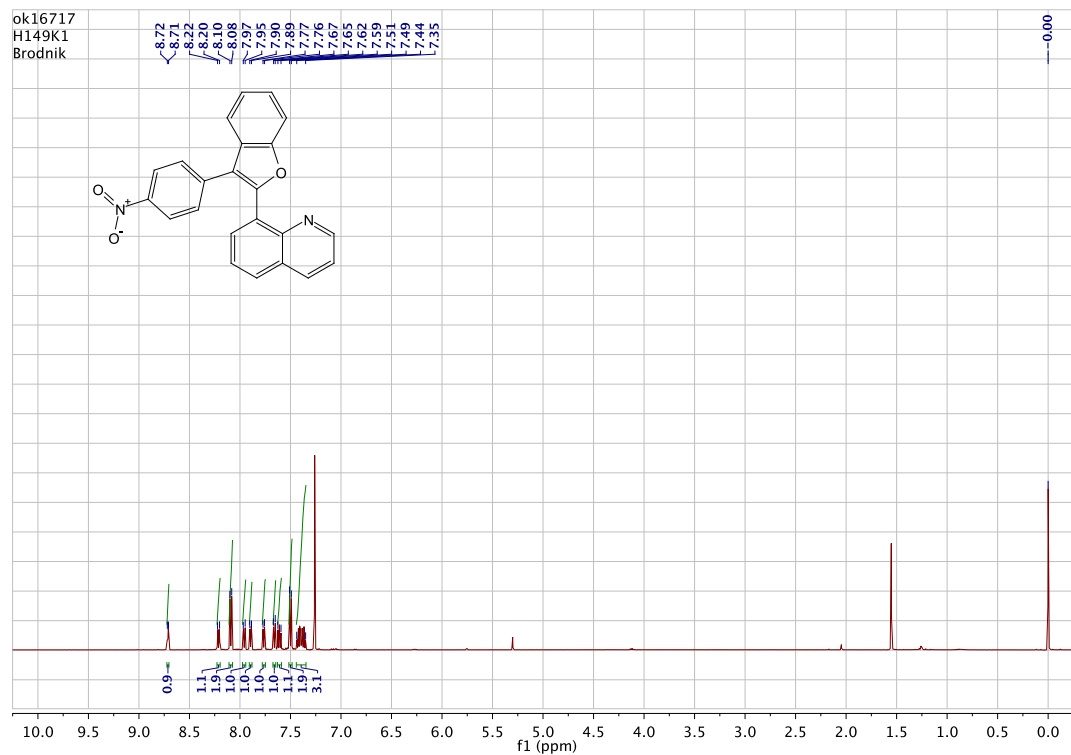

## <sup>13</sup>C NMR

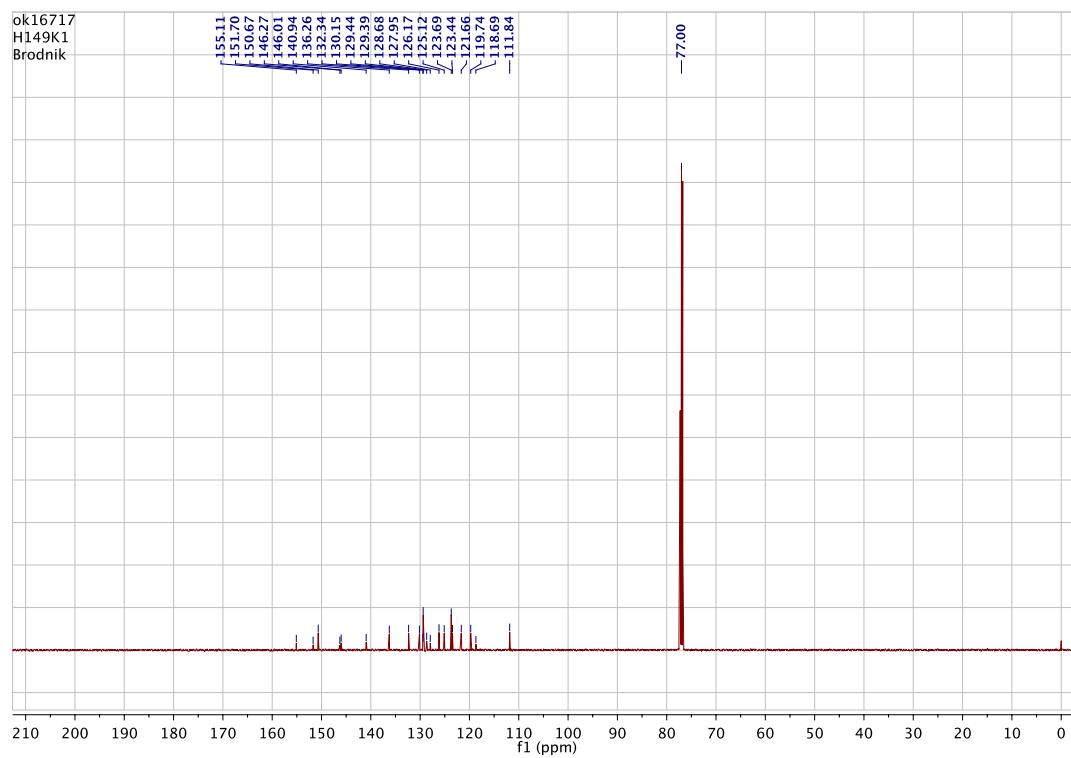



# Compound 71

## <sup>1</sup>H NMR

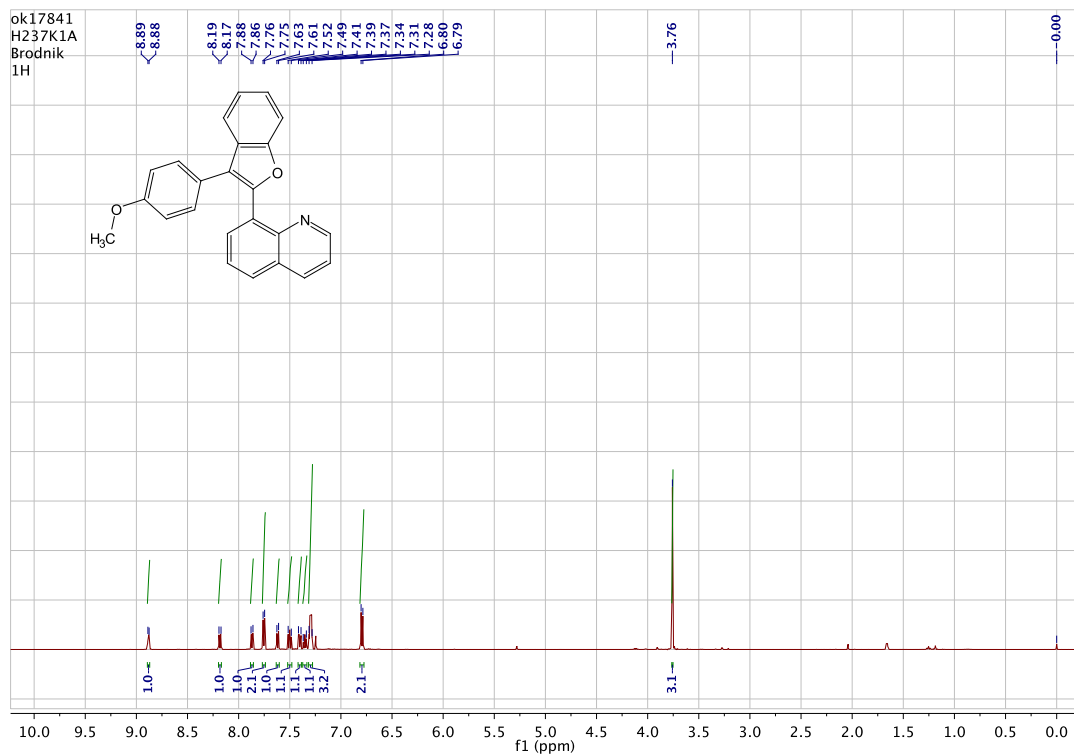

## <sup>13</sup>C NMR

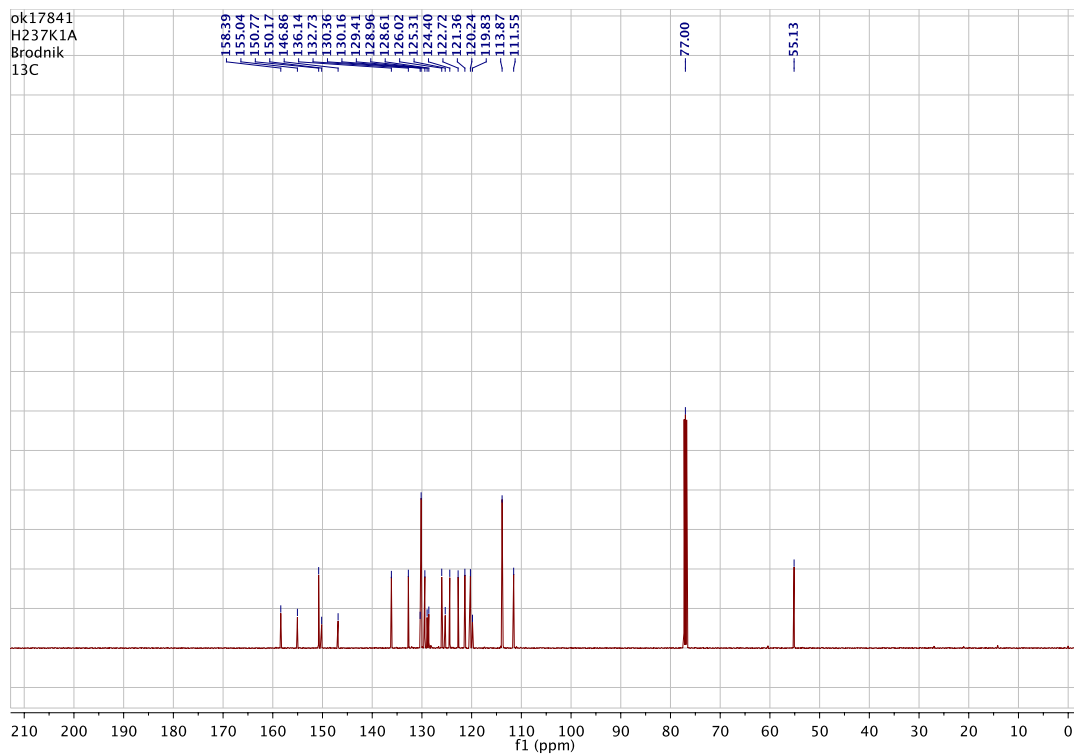

# Compound 7m

## <sup>1</sup>H NMR

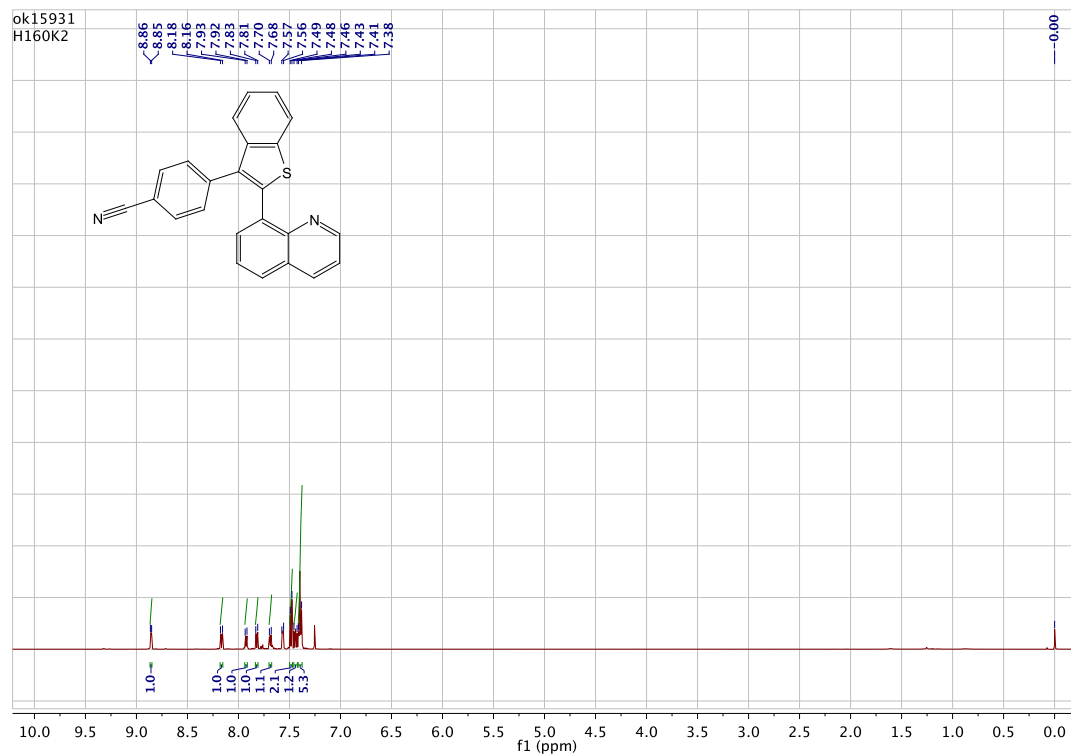

## <sup>13</sup>C NMR

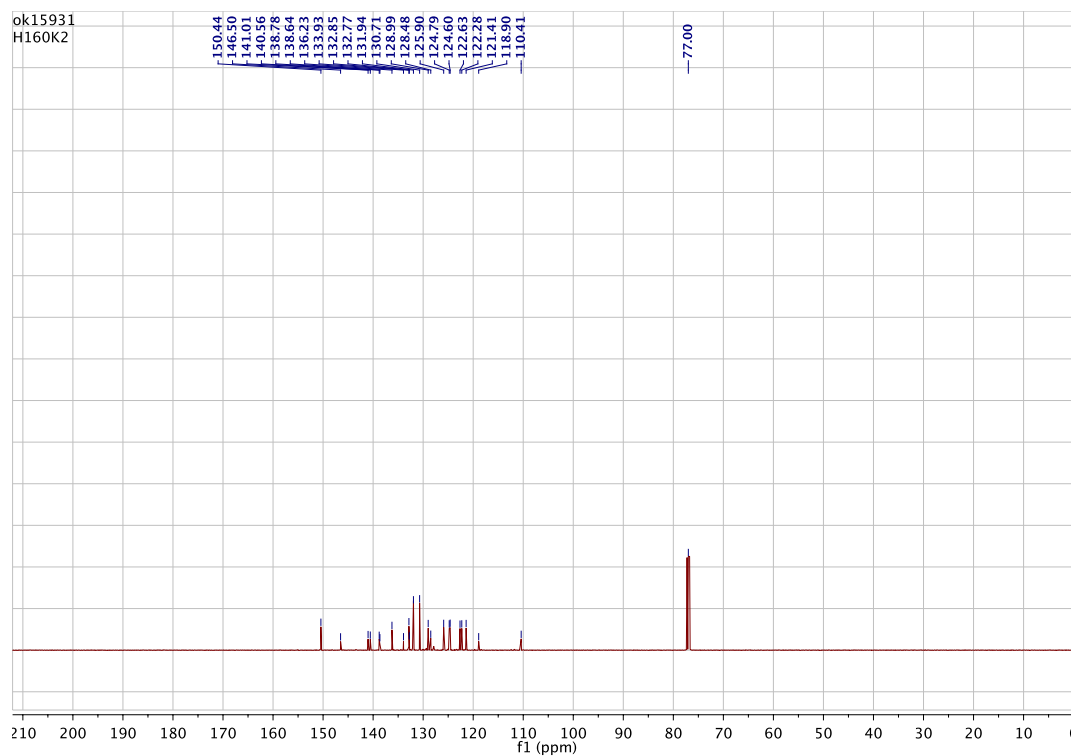

# Compound 7n

## <sup>1</sup>H NMR

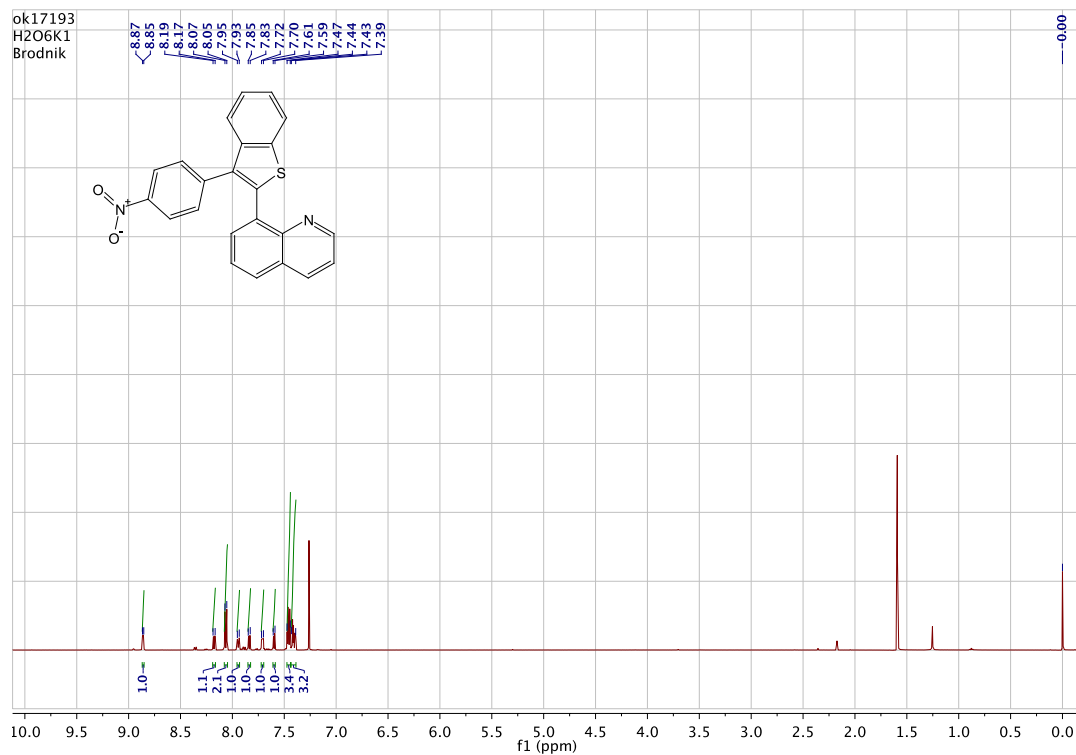

## <sup>13</sup>C NMR

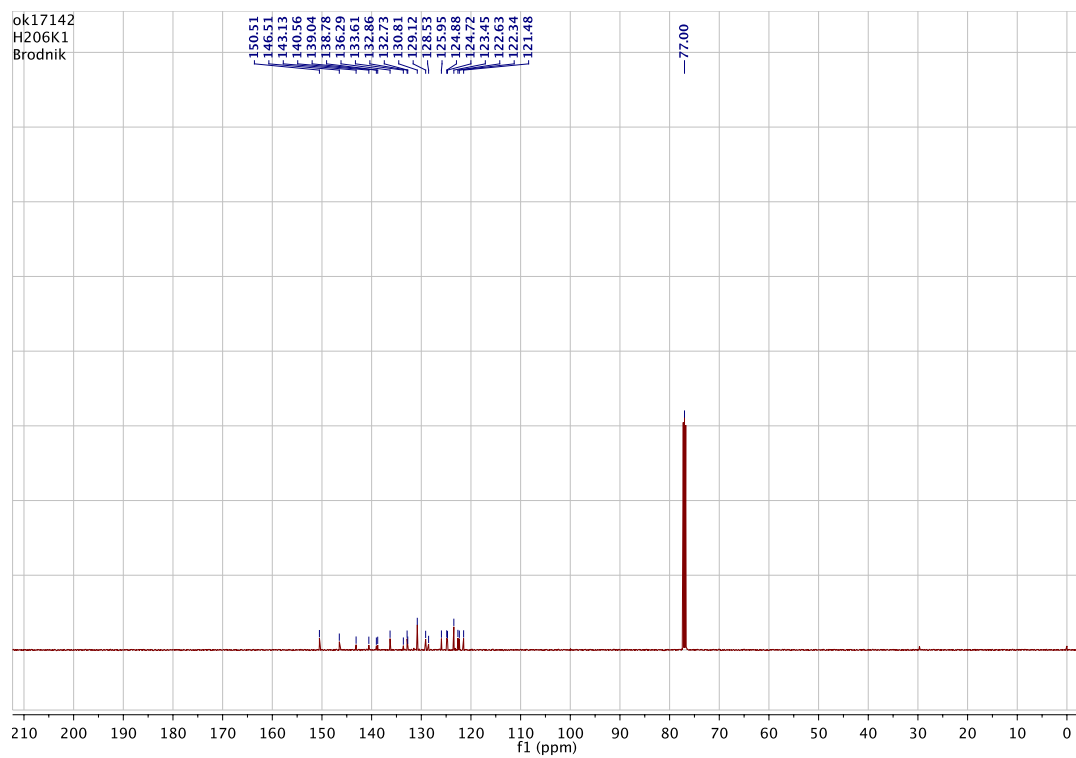

# Compound 7o

## <sup>1</sup>H NMR

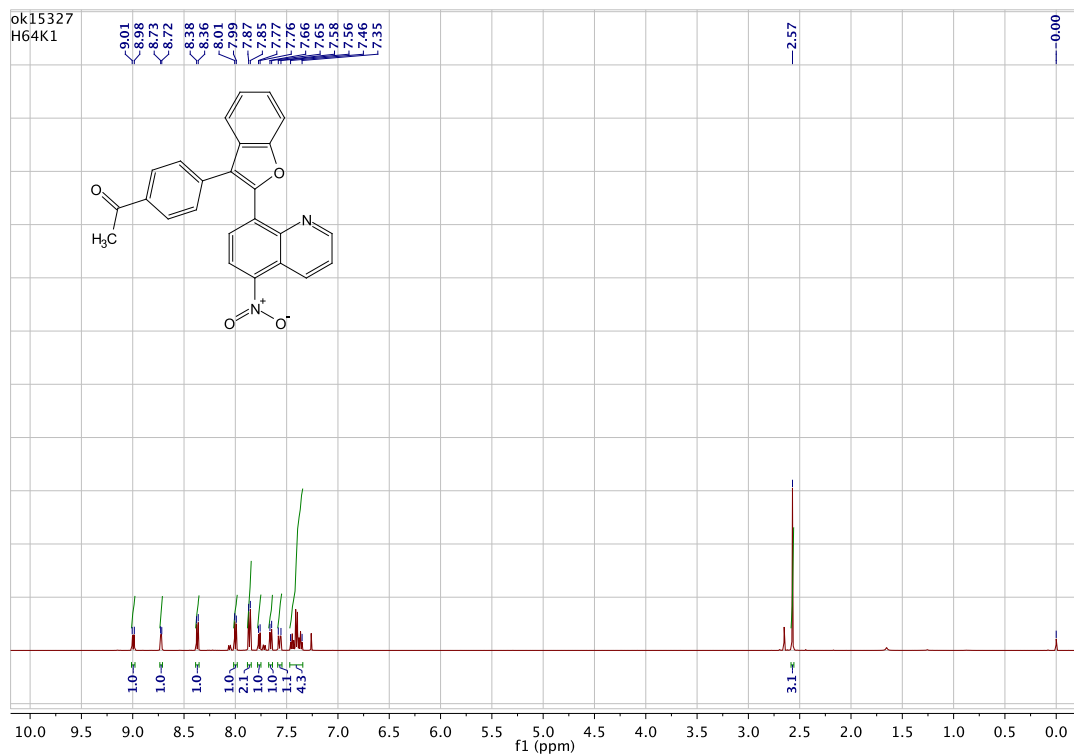

## <sup>13</sup>C NMR

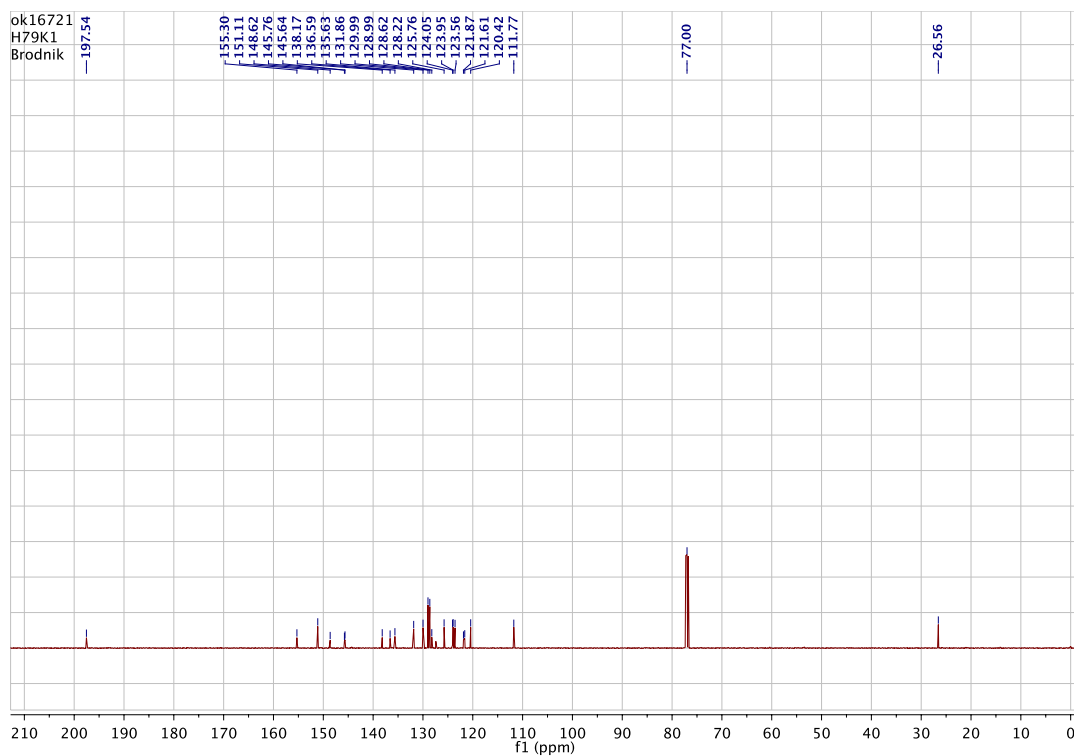



# Compound 7p

## <sup>1</sup>H NMR

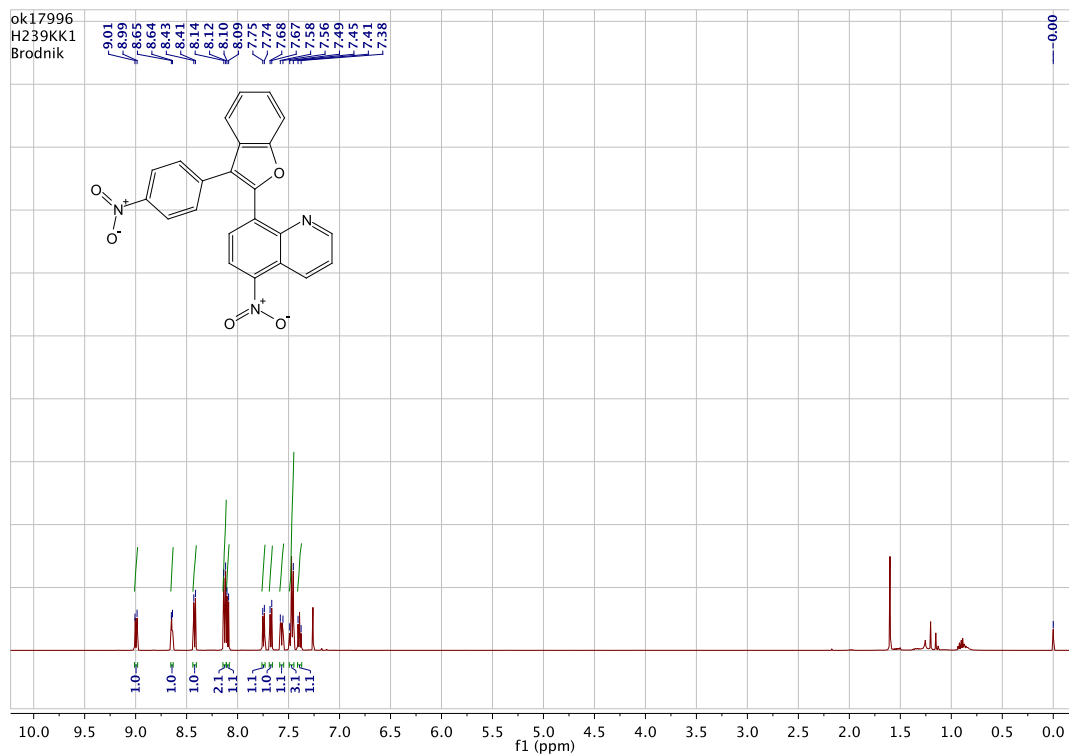

## <sup>13</sup>C NMR

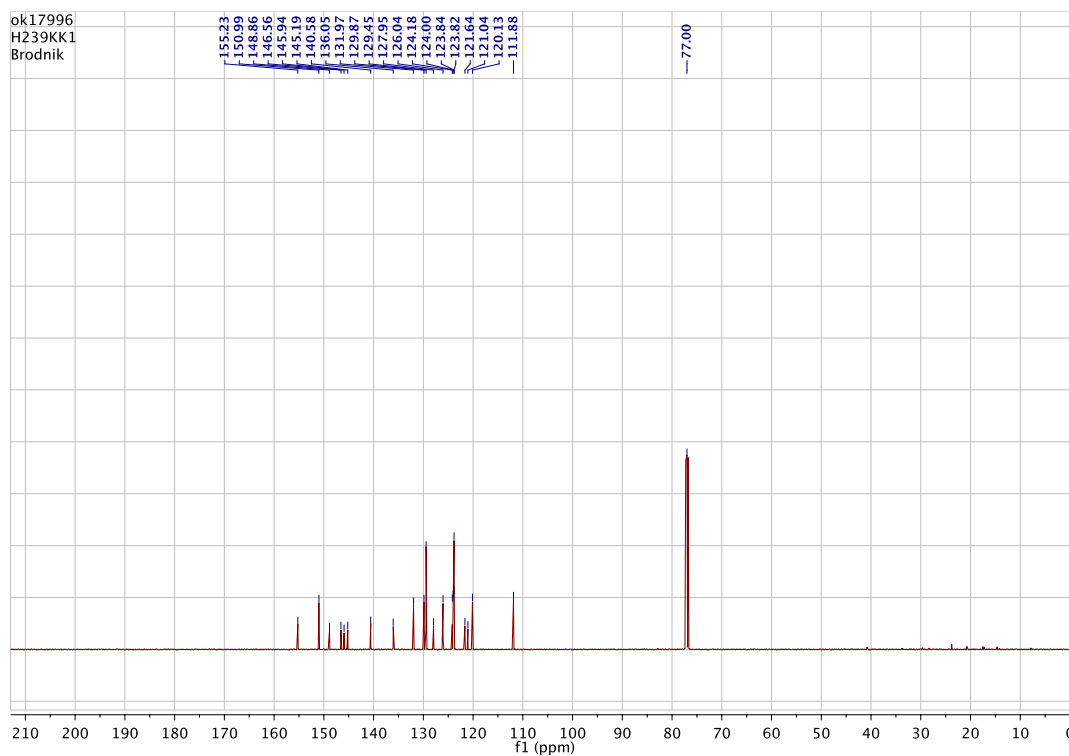

# Compound 7q

## <sup>1</sup>H NMR

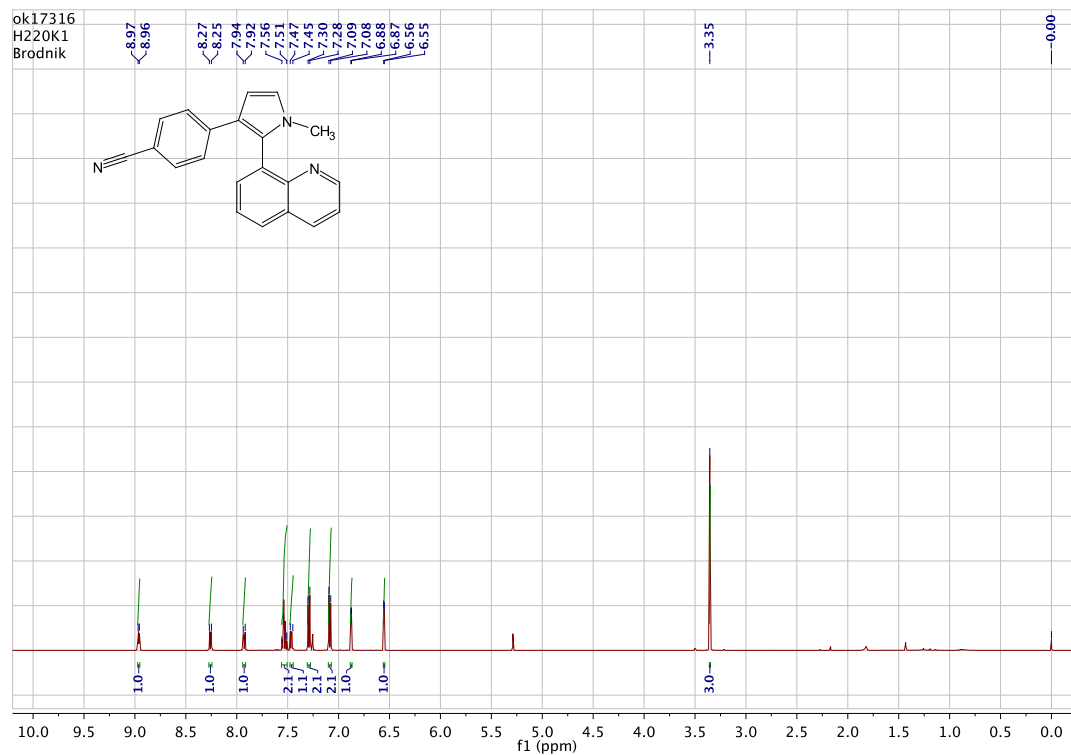

## <sup>13</sup>C NMR

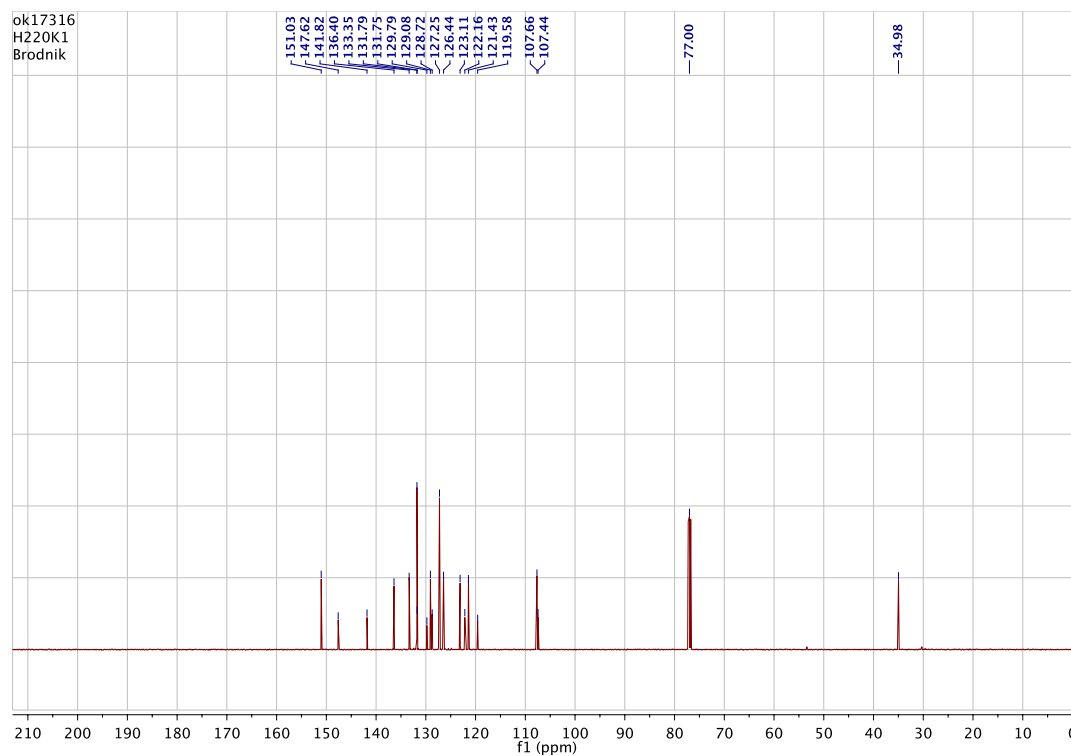

# Compound 7s

## <sup>1</sup>H NMR

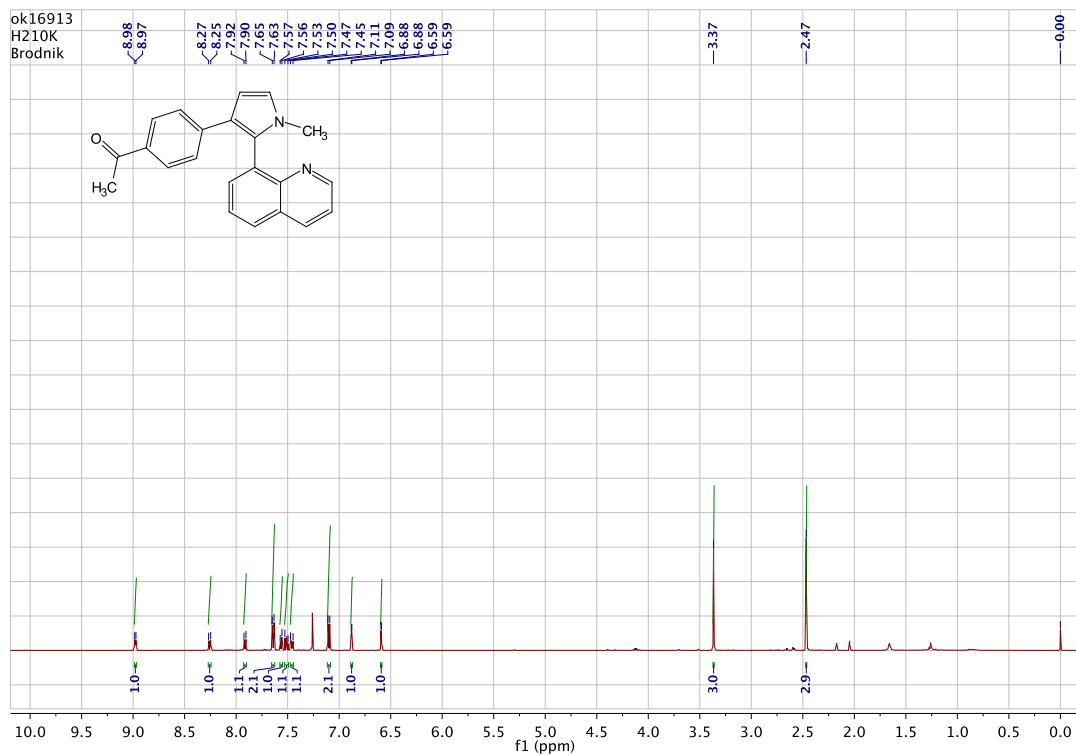

## <sup>13</sup>C NMR

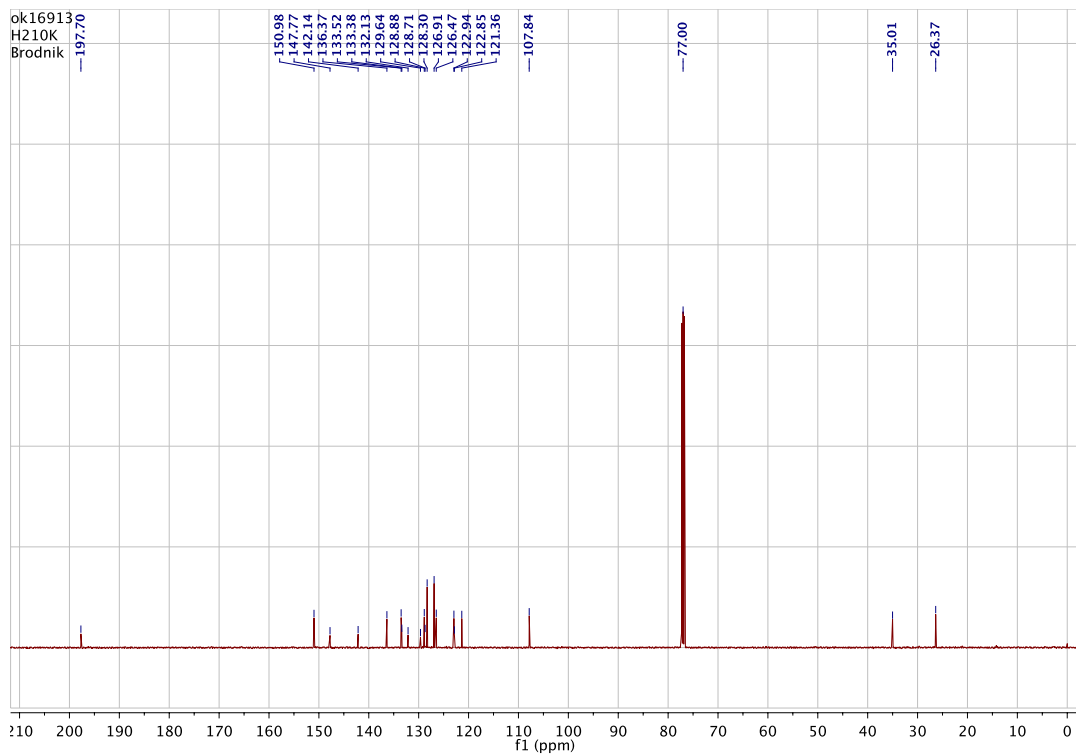

# Compound 7t

## <sup>1</sup>H NMR

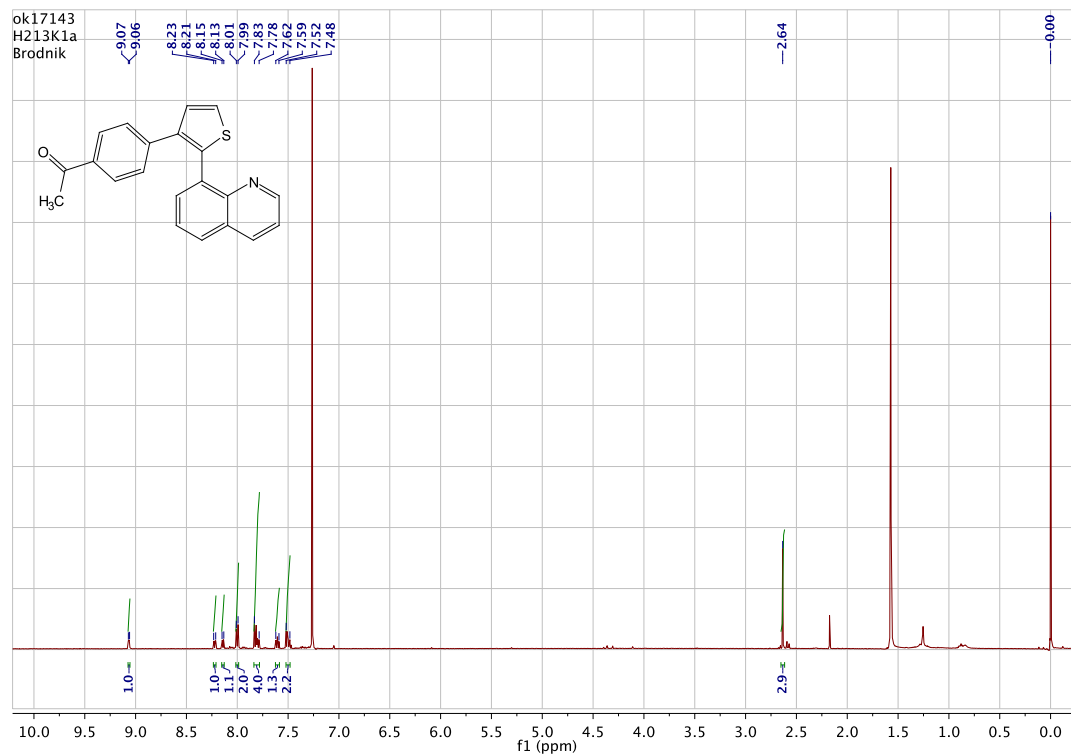

## <sup>13</sup>C NMR

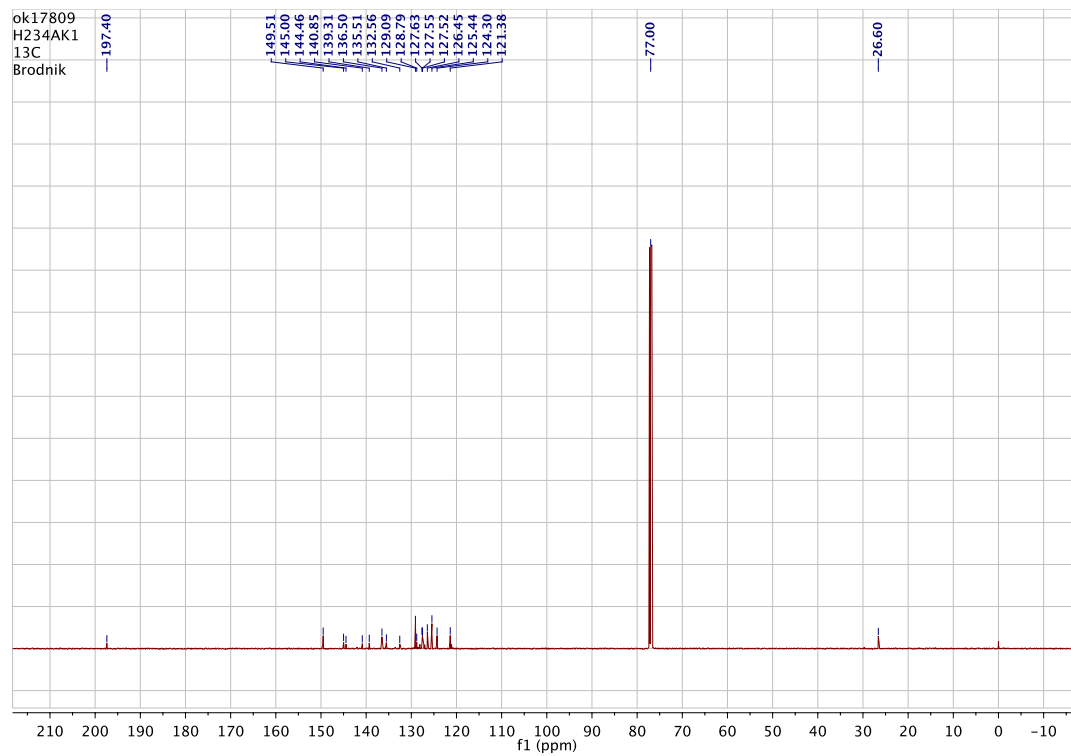

# Compound 7qa

## <sup>1</sup>H NMR

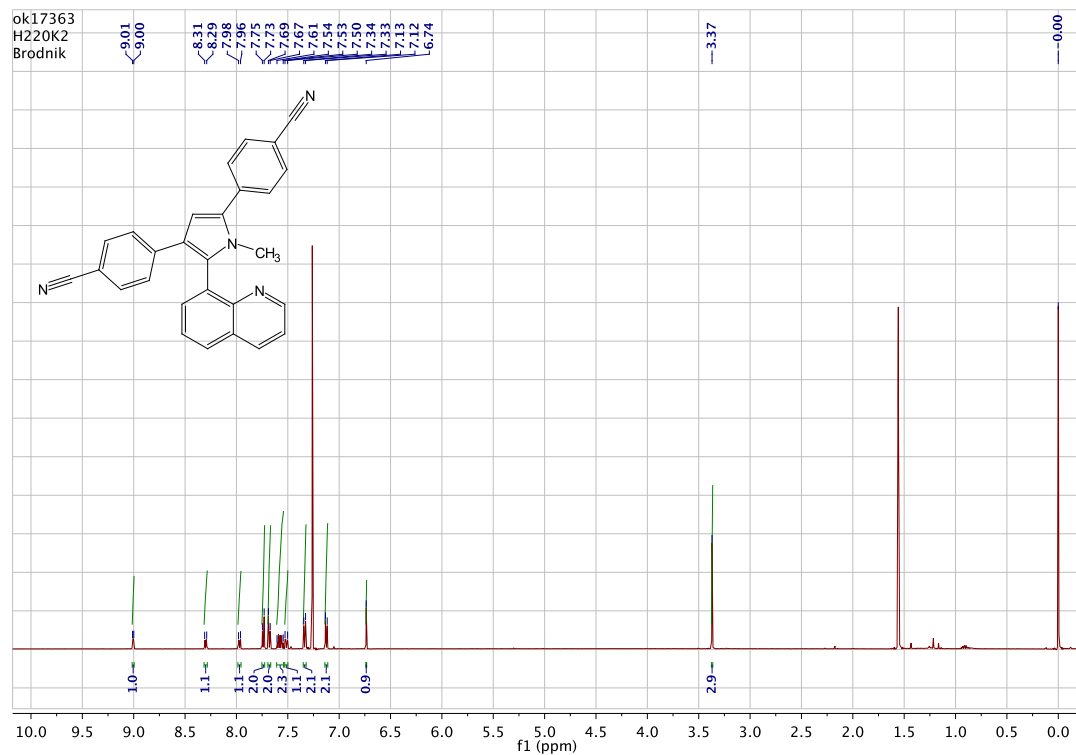

## <sup>13</sup>C NMR

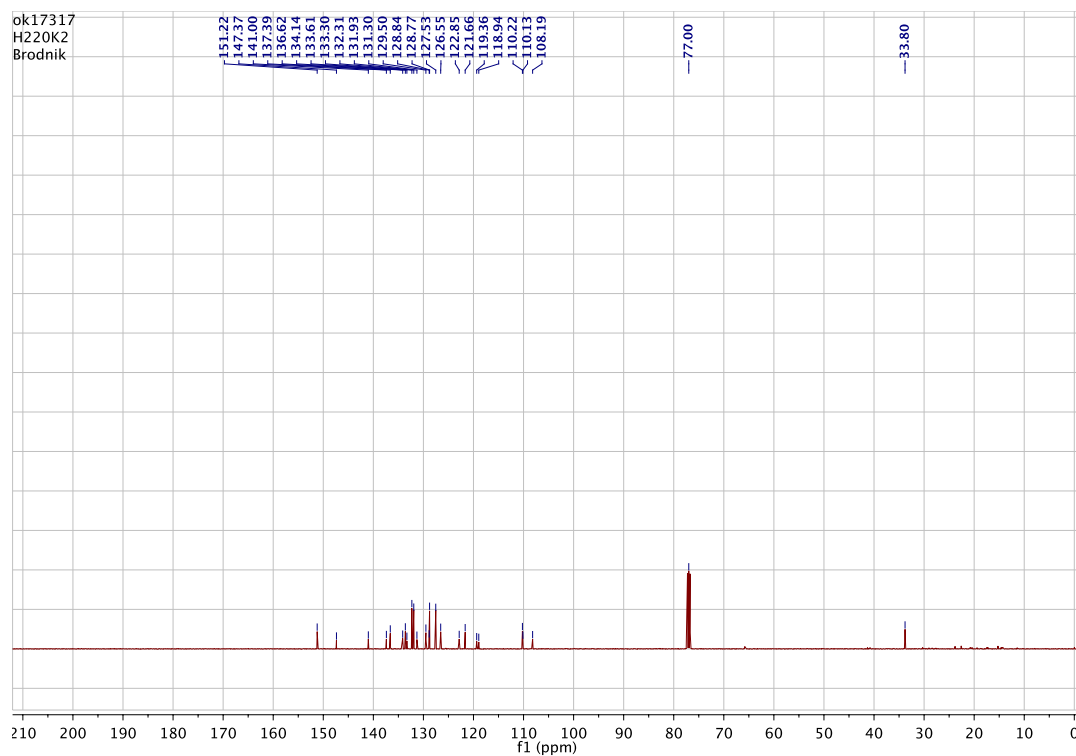

# Compound 7ra

## $^1\text{H}$ NMR

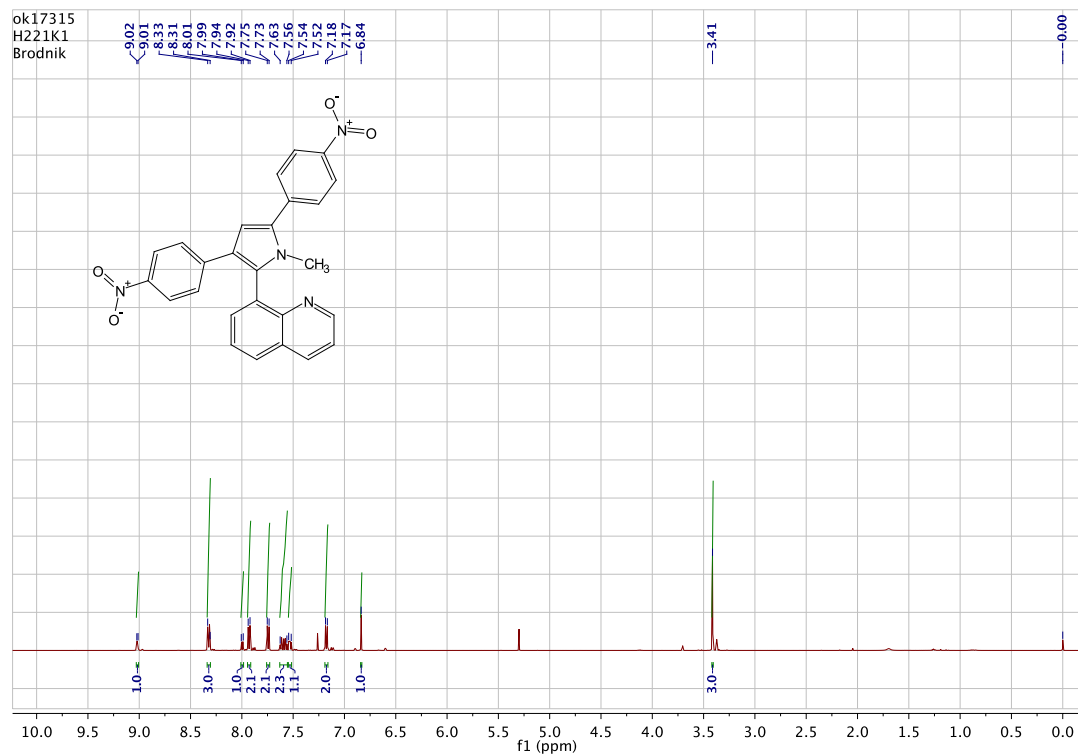

## $^{13}\text{C}$ NMR

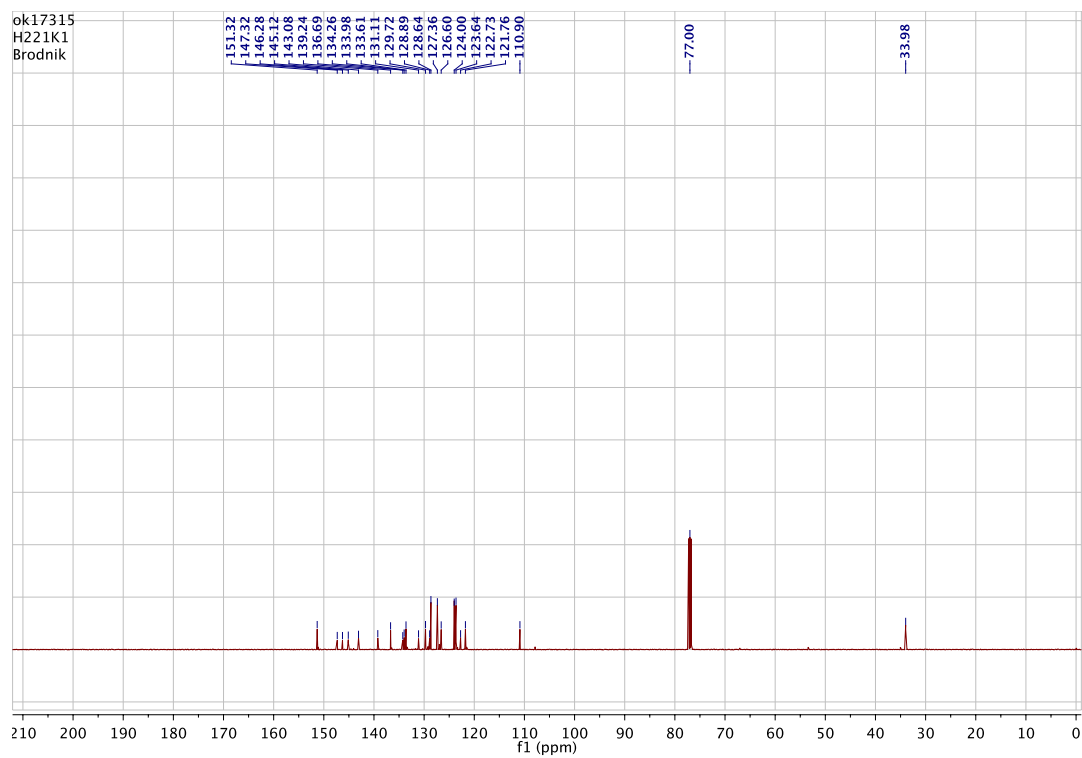

# Compound 7u

## <sup>1</sup>H NMR

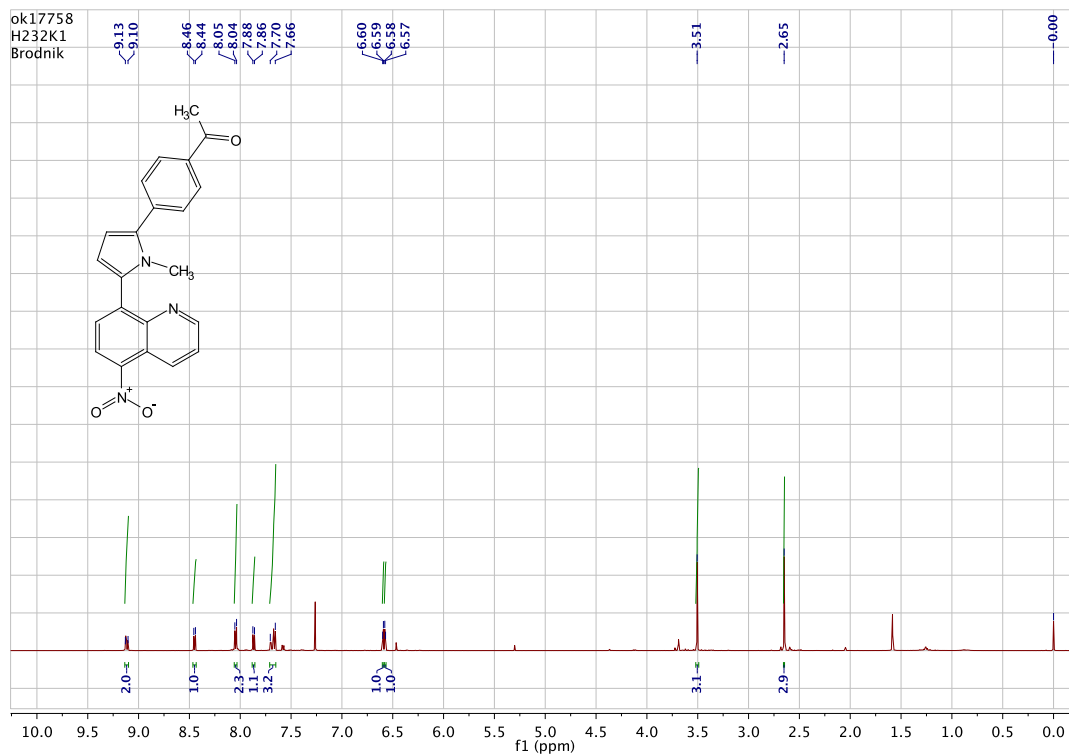

## <sup>13</sup>C NMR

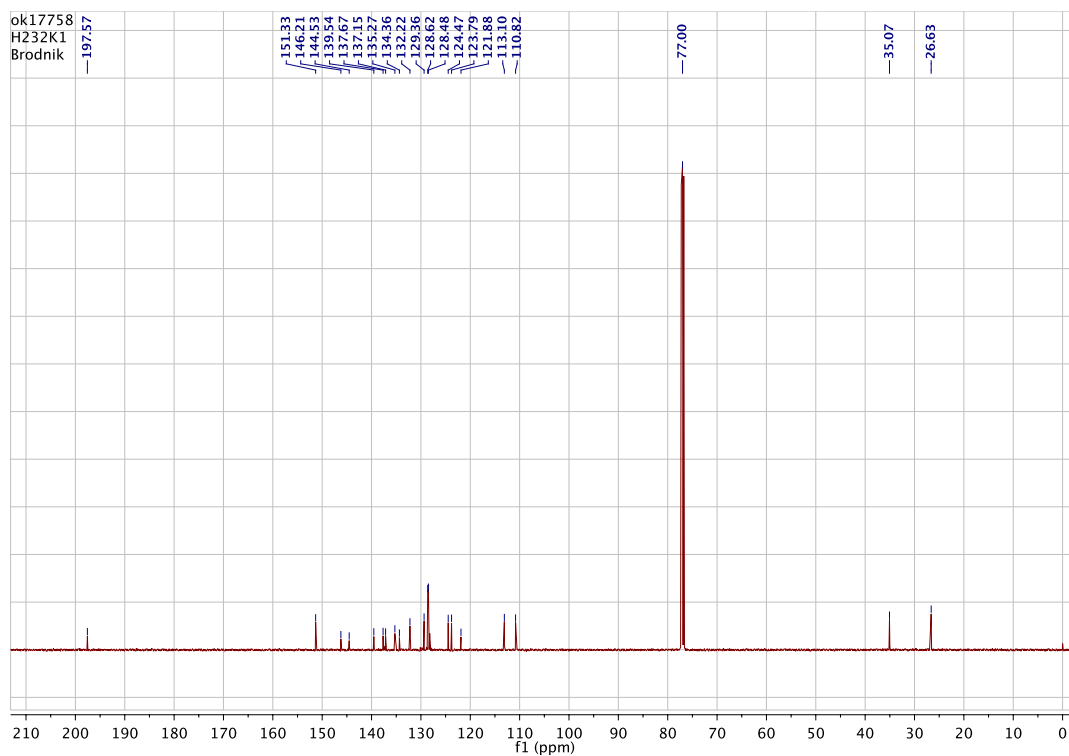

# Compound 8

## <sup>1</sup>H NMR

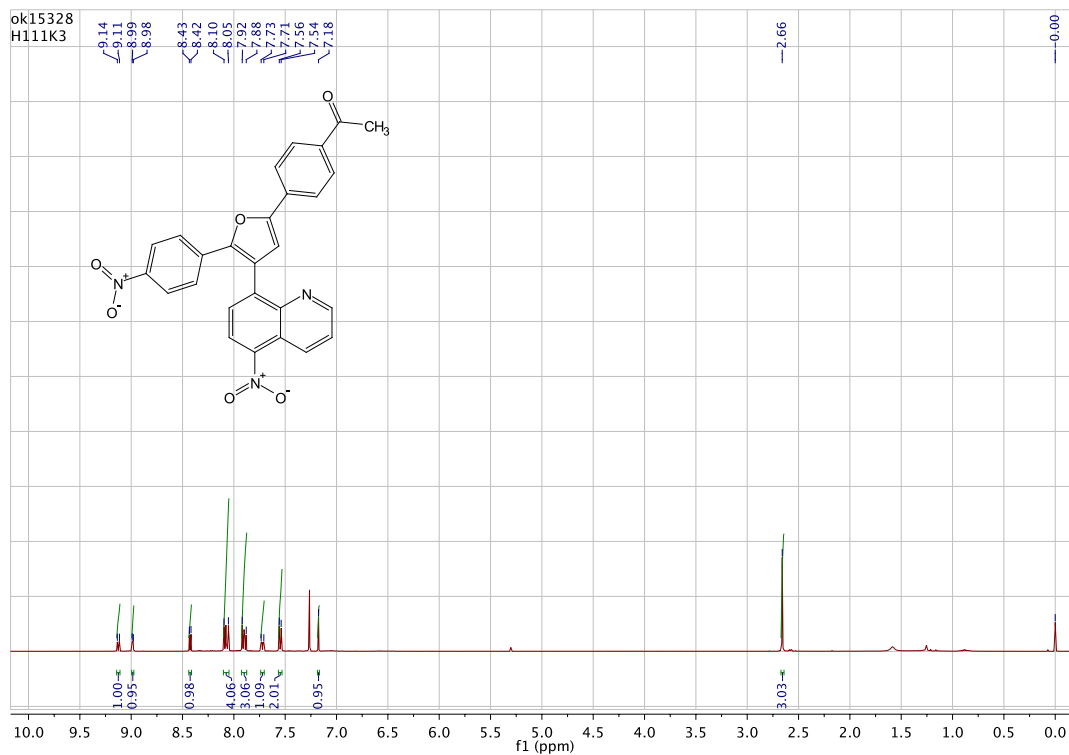

## <sup>13</sup>C NMR

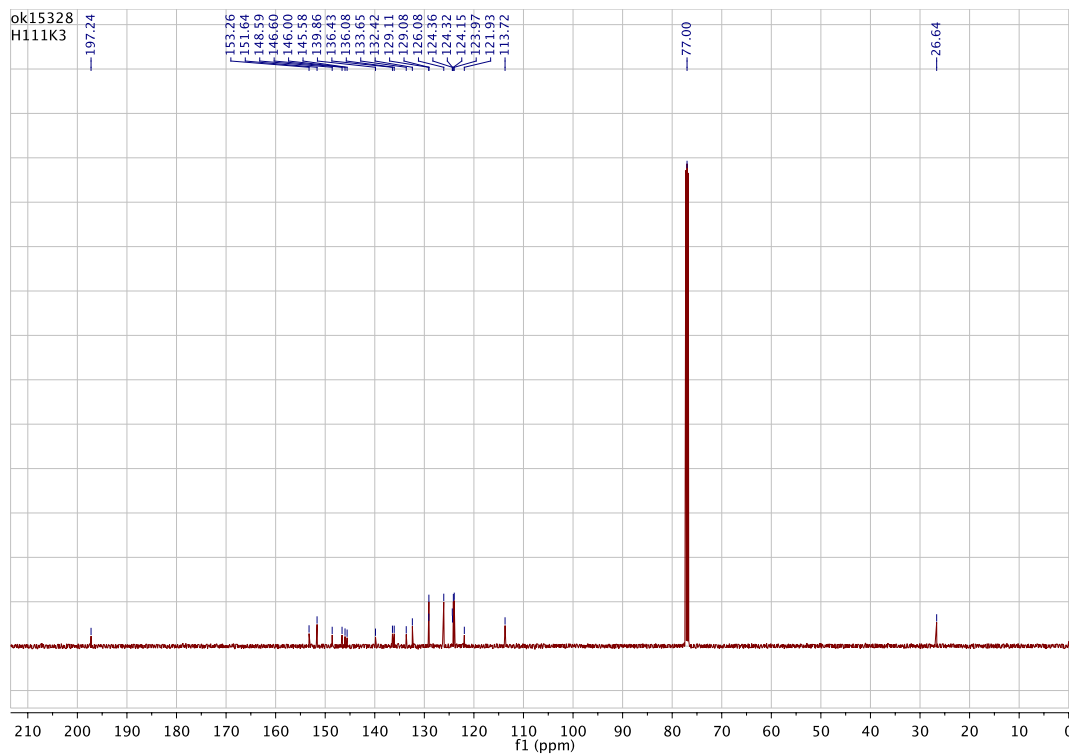



# Compound 9

## <sup>1</sup>H NMR

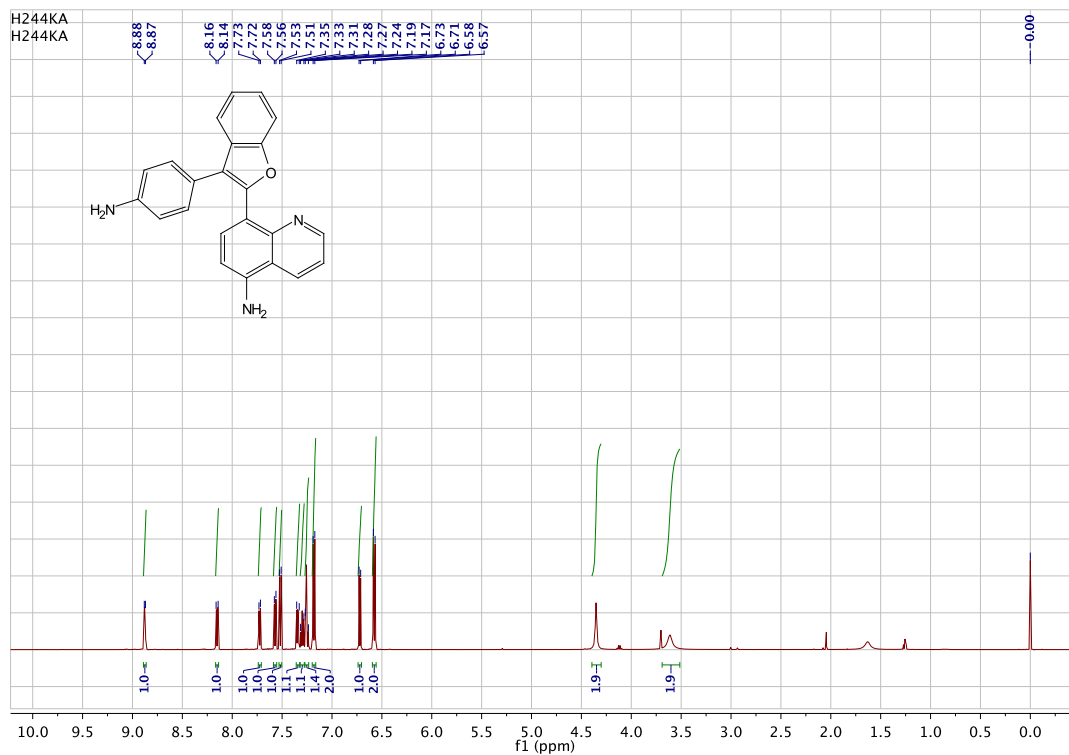

## <sup>13</sup>C NMR

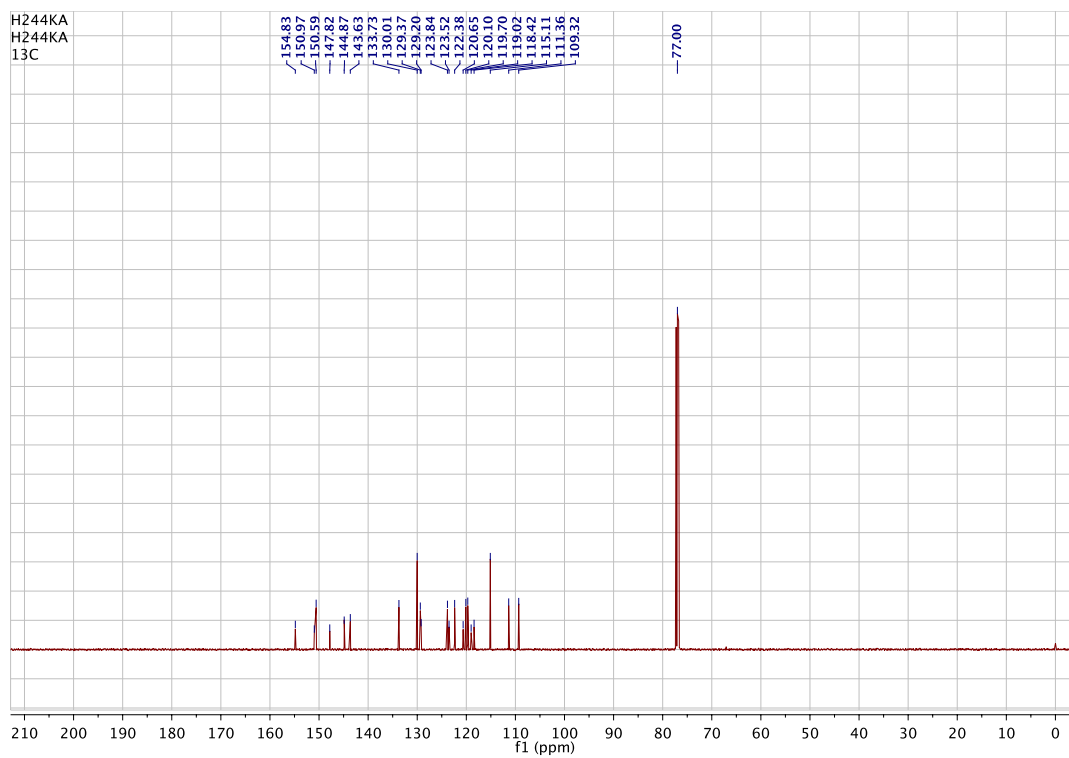

# Pd catalyst A

## <sup>1</sup>H NMR

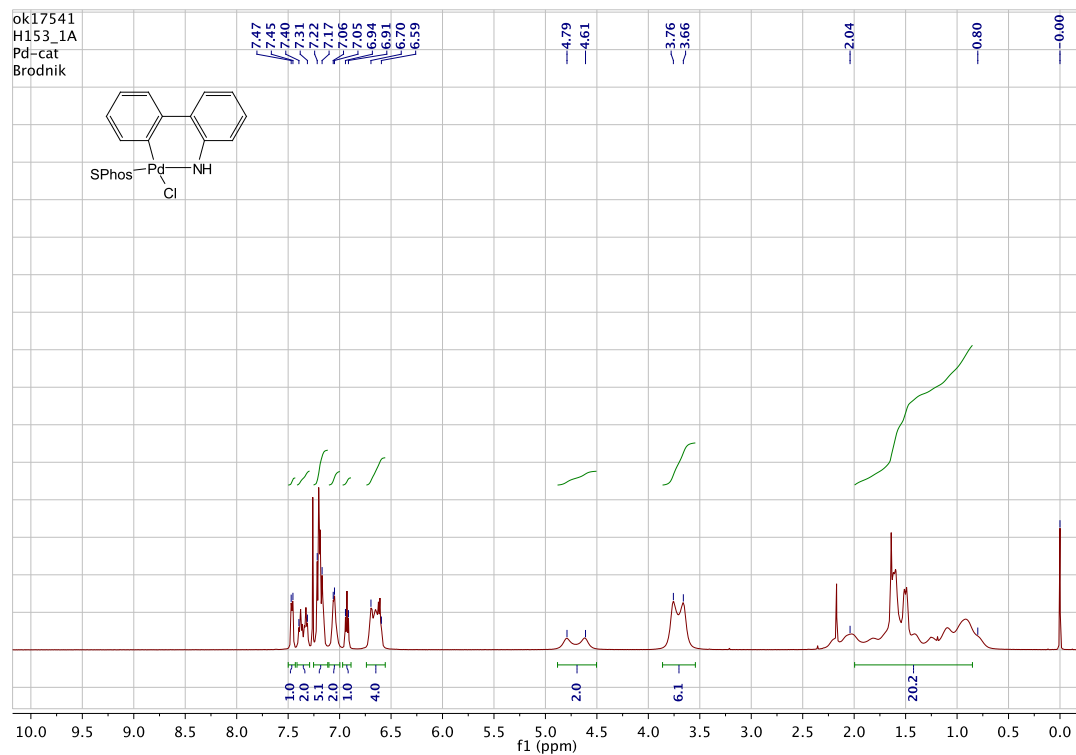

## <sup>13</sup>C NMR

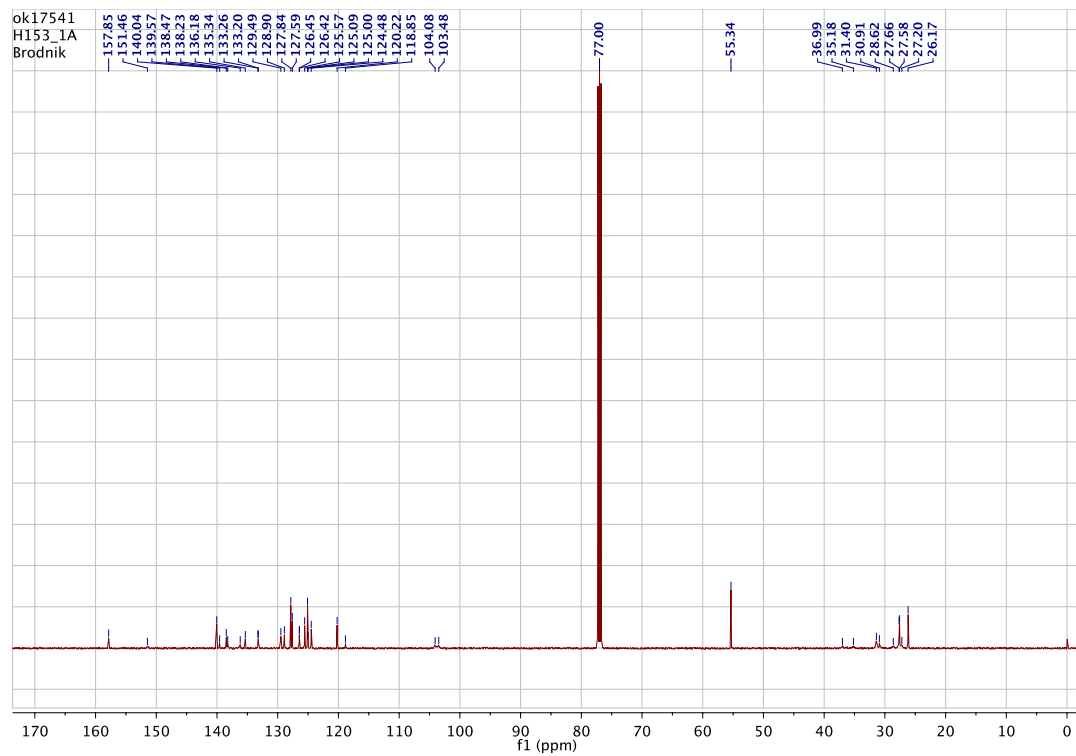

<sup>31</sup>P NMR

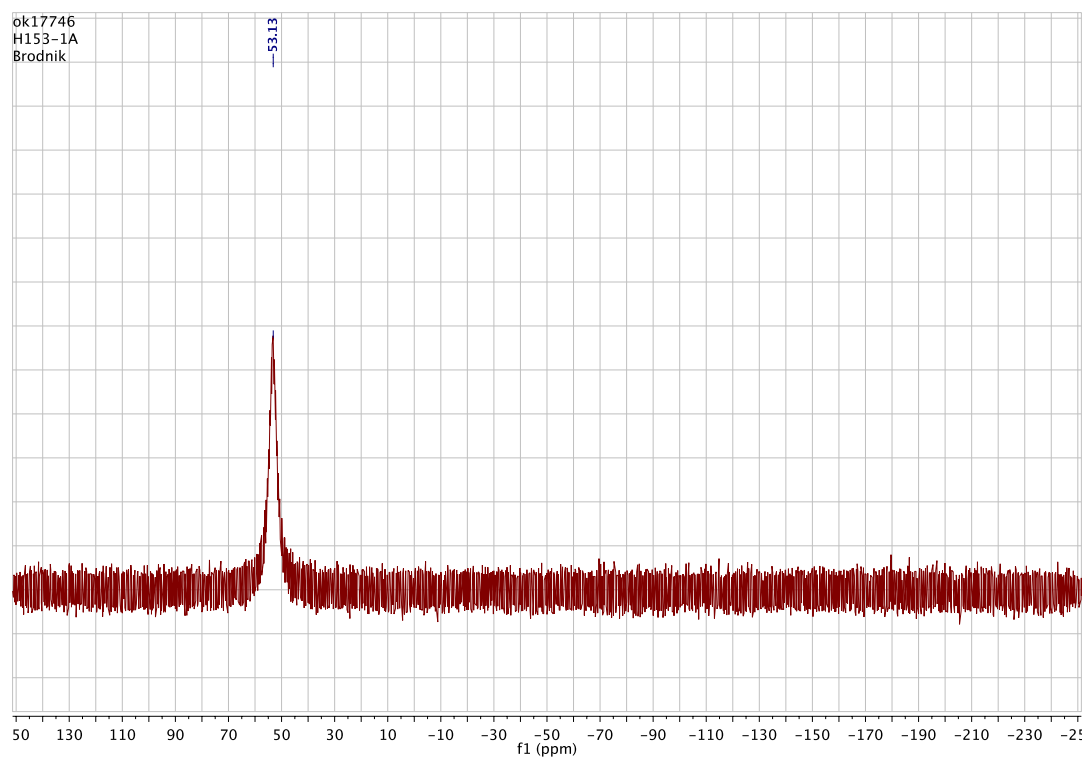

<sup>1</sup> T. Kinzel, Y. Zhang, S. L. Buchwald, *J. Am. Chem. Soc.* **2010**, *132*, 14073.

<sup>2</sup> J. Albert, J. Granell, J. Zafrilla, M. Font-Barida, X. Solans, *J. Organometallic Chem.* **2005**, *690*, 422.
